# Supplementary material for: Elucidating the mechanism and origins of selectivity on catalyst-dependent cyclization reactions to form polycyclic indolines from a theoretical study
Source: Royal Society of Chemistry journal article supplement (doi:10.1039/d1ra01632f), 2021-01-01
Supplement: d1ra01632f1.pdf [file d1ra01632f1.pdf]

## Supporting Information

# Elucidating the mechanism and origins of selectivity on catalyst-dependent cyclization reactions to form polycyclic indulines from a theoretical study

Yan Zhang, Yongsheng Yang, Ying Xue\*

College of Chemistry,  
Key Lab of Green Chemistry and Technology in Ministry of Education,  
Sichuan University, Chengdu 610064,  
People's Republic of China

### Constants

Figure S1. Geometric structures of transition states as well as the free energy barriers  $\Delta\Delta G^\ddagger$  and energy barriers  $\Delta\Delta E^\ddagger$  relative to the most favored path A from **1-Rh** to **int3** with real  $\text{Rh}_2(\text{esp})_2$  catalyst (energies are given in kcal/mol) .....s2

Figure S2. NCI plots for the transition states **A-TS3-R** and **C-TS3-R**..... s3

Cartesian coordinates (Å) for all ground state and transition state geometries.....s4

---

Corresponding author. Ying Xue, e-mail: [yxue@scu.edu.cn](mailto:yxue@scu.edu.cn)

Tel: +86 28 85418330.

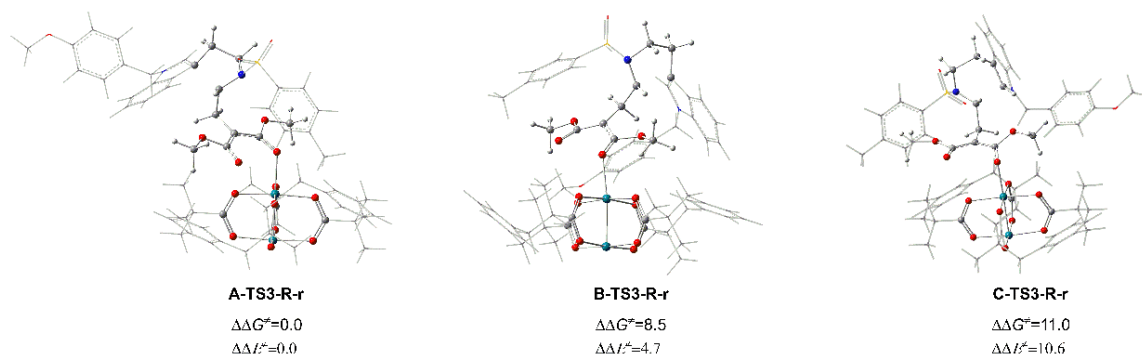

**Figure S1.** Geometric structures of transition states as well as the free energy barriers  $\Delta\Delta G^\ddagger$  and energy barriers  $\Delta\Delta E^\ddagger$  relative to the most favored path A from **1-Rh** to **int3** with real  $\text{Rh}_2(\text{esp})_2$  catalyst (energies are given in kcal/mol).

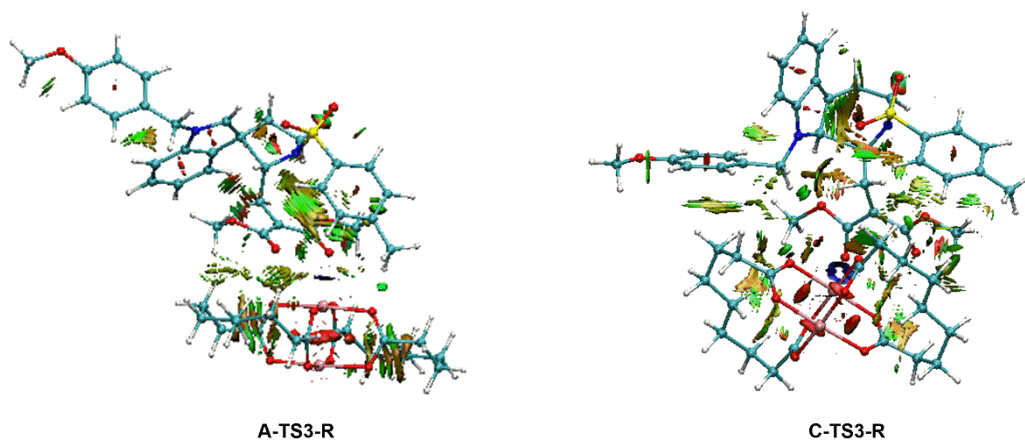

**Figure S2.** NCI plots for the transition states **A-TS3-R** and **C-TS3-R**.

## Cartesian coordinates (Å) for all ground state and transition state geometries

1

0 1

|   |             |             |             |
|---|-------------|-------------|-------------|
| C | 2.03078800  | -2.17501700 | -0.17795500 |
| C | 1.21593400  | -3.03157400 | -1.09666900 |
| O | 1.65331800  | -3.94021800 | -1.76643100 |
| C | 3.51081800  | -2.23513000 | -0.46039400 |
| O | 3.99196900  | -1.95468900 | -1.53766300 |
| O | -0.09571100 | -2.69129200 | -1.05875600 |
| O | 4.22689600  | -2.60053400 | 0.61360300  |
| C | -0.97074300 | -3.51337300 | -1.85211900 |
| H | -0.66127900 | -3.49740000 | -2.90014600 |
| H | -0.94733900 | -4.54650600 | -1.49556600 |
| H | -1.96238200 | -3.08264800 | -1.72787800 |
| C | 5.65509800  | -2.58296200 | 0.43106400  |
| H | 6.07558400  | -2.89871900 | 1.38492500  |
| H | 5.94509200  | -3.26734700 | -0.36977500 |
| H | 5.99188600  | -1.57462200 | 0.17737200  |
| C | -1.10664600 | 2.70850300  | -1.86931800 |
| C | 0.31782700  | 2.67114300  | -1.89519200 |
| C | 1.03581900  | 3.86399500  | -1.70302200 |
| C | 0.33889500  | 5.04354400  | -1.47050500 |
| C | -1.07102500 | 5.05897600  | -1.44423600 |
| C | -1.81037700 | 3.89898400  | -1.65296400 |
| C | -0.46293500 | 0.58687000  | -2.22199700 |
| C | 0.70352200  | 1.29945900  | -2.10866200 |
| H | 2.12088200  | 3.86295200  | -1.72516300 |
| H | 0.88424200  | 5.96860500  | -1.31152900 |
| H | -1.59082400 | 5.99593500  | -1.26796800 |
| H | -2.89554200 | 3.92599800  | -1.64458900 |
| H | -0.59930100 | -0.47699600 | -2.34971900 |
| N | -1.56252900 | 1.41746700  | -2.07311900 |
| C | -4.10123800 | -1.21720700 | -1.51817800 |
| C | -2.49231500 | -0.37179500 | 0.05298000  |
| C | -4.36061900 | -2.31183900 | -0.68522100 |
| H | -4.63782300 | -1.13777000 | -2.46066000 |
| C | -2.72701000 | -1.45664800 | 0.88410300  |
| H | -1.76252300 | 0.37361500  | 0.34703800  |
| C | -3.66412100 | -2.43668100 | 0.52294600  |
| H | -5.08675800 | -3.05410000 | -0.99327200 |
| H | -2.19280800 | -1.56403700 | 1.82110800  |
| O | -3.81290500 | -3.46353900 | 1.40752000  |

|   |             |             |             |
|---|-------------|-------------|-------------|
| C | 2.09062300  | 0.73273200  | -2.15105000 |
| H | 2.06132700  | -0.33354500 | -2.39236100 |
| H | 2.66966500  | 1.20204100  | -2.95810000 |
| C | 2.92563500  | 0.94068500  | -0.87594300 |
| H | 3.92400500  | 0.53243200  | -1.05514500 |
| H | 3.03762800  | 2.00273200  | -0.66209400 |
| N | 2.37831300  | 0.30145200  | 0.34972300  |
| C | 1.47294300  | -0.80990800 | 0.25580400  |
| C | 1.53794400  | -1.93766100 | 1.23560300  |
| H | 0.49249900  | -0.58371900 | -0.14712900 |
| H | 0.59290700  | -2.39449500 | 1.50744400  |
| H | 2.29939300  | -1.89860800 | 2.00299500  |
| S | 2.32501100  | 1.18521900  | 1.79621800  |
| O | 2.98747800  | 2.46525100  | 1.52544300  |
| O | 2.79583500  | 0.30971500  | 2.87553100  |
| C | 0.58494500  | 1.49831100  | 2.10989500  |
| C | -0.03802800 | 2.58587100  | 1.49863300  |
| C | -0.12120800 | 0.64684400  | 2.96309700  |
| C | -1.39557700 | 2.80326500  | 1.73035200  |
| H | 0.52520700  | 3.25183000  | 0.85678000  |
| C | -1.47443700 | 0.88381400  | 3.18703100  |
| H | 0.39634200  | -0.17239700 | 3.44872800  |
| C | -2.13500000 | 1.95267600  | 2.56245300  |
| H | -1.88175500 | 3.63975800  | 1.23886900  |
| H | -2.03060000 | 0.22588200  | 3.84934800  |
| C | -3.62113000 | 2.13647800  | 2.73667000  |
| H | -3.93404600 | 3.15554300  | 2.49374600  |
| H | -4.16189100 | 1.45154000  | 2.07143800  |
| H | -3.93813400 | 1.91412900  | 3.76014700  |
| C | -4.72983500 | -4.50022300 | 1.08808700  |
| H | -4.45236400 | -5.01332000 | 0.15775700  |
| H | -4.68359000 | -5.20910800 | 1.91576300  |
| H | -5.75579800 | -4.12051300 | 0.99509200  |
| C | -3.17497100 | -0.23607200 | -1.16592700 |
| C | -2.94593200 | 0.96746100  | -2.06239700 |
| H | -3.27879300 | 0.73978700  | -3.08349600 |
| H | -3.55467700 | 1.80845900  | -1.71545300 |

## R1

0 1

|   |             |            |             |
|---|-------------|------------|-------------|
| C | -1.49944600 | 2.52402600 | -0.19771700 |
| C | -2.60629000 | 1.62778500 | -0.18358900 |
| C | -3.25875900 | 1.33121300 | -1.39273200 |
| C | -2.78558600 | 1.89801600 | -2.57014000 |

|   |             |             |             |
|---|-------------|-------------|-------------|
| C | -1.67180500 | 2.76279200  | -2.56527100 |
| C | -1.01528900 | 3.08851500  | -1.38253300 |
| C | -1.80567800 | 1.82639000  | 1.90777500  |
| C | -2.76770100 | 1.17995500  | 1.17646400  |
| H | -4.10201000 | 0.64877100  | -1.41335100 |
| H | -3.27077900 | 1.66171300  | -3.51183700 |
| H | -1.31671000 | 3.17899700  | -3.50315800 |
| H | -0.14968700 | 3.74298200  | -1.38358000 |
| H | -1.59087900 | 1.75802100  | 2.96577800  |
| N | -1.04386400 | 2.65771000  | 1.10177700  |
| C | 2.57795000  | 2.71742500  | 0.59854500  |
| C | 1.35533400  | 0.93684100  | 1.64566000  |
| C | 3.65996400  | 1.86466000  | 0.40295300  |
| H | 2.64530900  | 3.74720000  | 0.25519700  |
| C | 2.42673000  | 0.06842000  | 1.45735200  |
| H | 0.45417100  | 0.54051500  | 2.09957400  |
| C | 3.59088000  | 0.53518900  | 0.83776000  |
| H | 4.56585800  | 2.20464000  | -0.08743100 |
| H | 2.32135600  | -0.96335400 | 1.76756900  |
| O | 4.69654900  | -0.23068800 | 0.59018100  |
| C | -3.68627100 | 0.11528900  | 1.68737700  |
| H | -3.58657000 | 0.04322200  | 2.77635800  |
| H | -4.73931600 | 0.36387300  | 1.50012600  |
| C | -3.45186000 | -1.26688700 | 1.03104800  |
| H | -4.01657200 | -2.03137600 | 1.57984000  |
| H | -3.82967100 | -1.24899500 | 0.01099100  |
| N | -2.02748300 | -1.65583000 | 0.94065300  |
| C | -1.26120500 | -1.69623900 | 2.11641800  |
| C | -0.16616600 | -2.41293100 | 2.40134300  |
| H | -1.63333500 | -0.98946300 | 2.85134200  |
| H | 0.32143900  | -2.25172900 | 3.35557200  |
| H | 0.24863800  | -3.16020700 | 1.74001800  |
| S | -1.55188800 | -2.56672900 | -0.43488200 |
| O | -2.58187300 | -2.30326800 | -1.44521600 |
| O | -1.24100700 | -3.94601400 | -0.03993100 |
| C | -0.02528400 | -1.79205400 | -0.95911200 |
| C | -0.04681900 | -0.47180400 | -1.40480700 |
| C | 1.13487600  | -2.56467100 | -1.04071800 |
| C | 1.12077600  | 0.08722900  | -1.91687400 |
| H | -0.95823700 | 0.10731000  | -1.36153200 |
| C | 2.28692300  | -1.99209700 | -1.57338400 |
| H | 1.11763900  | -3.59667300 | -0.70895400 |
| C | 2.30007500  | -0.66039300 | -2.01660700 |
| H | 1.10443300  | 1.12190300  | -2.24318000 |

|   |            |             |             |
|---|------------|-------------|-------------|
| H | 3.19076800 | -2.58987600 | -1.65708500 |
| C | 3.56177700 | -0.06389000 | -2.58827300 |
| H | 3.86202200 | -0.58793600 | -3.50298900 |
| H | 3.42846800 | 0.99297900  | -2.83114700 |
| H | 4.38382600 | -0.14665600 | -1.87075800 |
| C | 4.71980300 | -1.55516200 | 1.10944900  |
| H | 4.62119600 | -1.55789000 | 2.20255900  |
| H | 3.92542400 | -2.17256200 | 0.67487700  |
| H | 5.69108600 | -1.96836100 | 0.83351300  |
| C | 1.41209400 | 2.27041000  | 1.23147100  |
| C | 0.24709400 | 3.21267000  | 1.48548800  |
| H | 0.18089700 | 3.46790300  | 2.54944600  |
| H | 0.39481600 | 4.15514100  | 0.94898600  |

### 1-Rh

0 1

|   |             |             |             |
|---|-------------|-------------|-------------|
| C | -0.61309200 | 1.08612600  | -0.67213700 |
| C | -0.11683700 | 0.14322100  | -1.72427300 |
| O | 0.86834600  | -0.57831200 | -1.65774200 |
| C | -0.15313400 | 2.50043100  | -0.86329700 |
| O | -0.38022200 | 3.41927300  | -0.10757500 |
| O | -0.87390000 | 0.17696800  | -2.82828100 |
| O | 0.57762500  | 2.61106000  | -1.99135300 |
| C | -0.36259900 | -0.54142700 | -3.97115300 |
| H | -0.27237300 | -1.60647900 | -3.74862500 |
| H | -1.08790000 | -0.37081900 | -4.76581900 |
| H | 0.62009100  | -0.15013200 | -4.24345300 |
| C | 1.20833200  | 3.88582300  | -2.19823700 |
| H | 1.83017200  | 3.76369900  | -3.08416400 |
| H | 0.45663500  | 4.66431200  | -2.35317100 |
| H | 1.82172400  | 4.14572600  | -1.33405300 |
| C | -6.05942700 | -1.30108800 | -2.14112200 |
| C | -6.29986700 | 0.06155100  | -1.80572200 |
| C | -7.59076400 | 0.45700900  | -1.42541600 |
| C | -8.59891100 | -0.49858200 | -1.36505700 |
| C | -8.33651500 | -1.84989400 | -1.66925000 |
| C | -7.06708900 | -2.26927400 | -2.05870600 |
| C | -4.13936000 | -0.16038600 | -2.38537000 |
| C | -5.04855700 | 0.76601500  | -1.94514400 |
| H | -7.79430000 | 1.49187500  | -1.16809100 |
| H | -9.60311500 | -0.20413600 | -1.07480800 |
| H | -9.14066000 | -2.57747500 | -1.60747600 |
| H | -6.87749000 | -3.31047400 | -2.30145600 |
| H | -3.08960300 | -0.04279000 | -2.60529900 |

|   |             |             |             |
|---|-------------|-------------|-------------|
| N | -4.73053800 | -1.41231000 | -2.52651900 |
| C | -3.86284600 | -2.79072000 | 0.01232200  |
| C | -1.77404200 | -2.76550500 | -1.17210200 |
| C | -3.18406900 | -2.69814800 | 1.22757300  |
| H | -4.94915700 | -2.80809900 | 0.01068900  |
| C | -1.07570500 | -2.67715900 | 0.02964500  |
| H | -1.21262200 | -2.77655200 | -2.10191300 |
| C | -1.78623200 | -2.59665600 | 1.23626200  |
| H | -3.74676500 | -2.66559400 | 2.15301500  |
| H | 0.00506600  | -2.58595800 | 0.05269000  |
| O | -1.04456300 | -2.38098900 | 2.35996300  |
| C | -4.81929900 | 2.21963300  | -1.63790400 |
| H | -5.03240500 | 2.84703600  | -2.51587100 |
| H | -5.53609200 | 2.53384600  | -0.87179500 |
| C | -3.40076000 | 2.57743000  | -1.16072600 |
| H | -2.67275800 | 2.33296500  | -1.93906900 |
| H | -3.33541400 | 3.65285400  | -0.98007600 |
| N | -2.93555500 | 1.88083200  | 0.05518100  |
| C | -2.00235300 | 0.80071500  | -0.06118100 |
| C | -0.76933900 | 0.67271700  | 0.76904800  |
| H | -2.42797300 | -0.13843300 | -0.40645600 |
| H | -0.43417300 | -0.31555000 | 1.05529500  |
| H | -0.55813100 | 1.46332200  | 1.47351100  |
| S | -3.56165800 | 2.34950700  | 1.53946900  |
| O | -3.82765300 | 3.78883300  | 1.46608200  |
| O | -2.70270400 | 1.77545300  | 2.58182300  |
| C | -5.15137200 | 1.53009600  | 1.67316500  |
| C | -6.29297500 | 2.27220600  | 1.96571700  |
| C | -5.20953100 | 0.14226700  | 1.53718400  |
| C | -7.50861800 | 1.60403300  | 2.13070000  |
| H | -6.22227300 | 3.35029100  | 2.05958500  |
| C | -6.42646300 | -0.50535700 | 1.70178500  |
| H | -4.31815700 | -0.41910500 | 1.28964200  |
| C | -7.59395800 | 0.21255400  | 2.00700200  |
| H | -8.40407500 | 2.17631800  | 2.35787000  |
| H | -6.48204700 | -1.58318200 | 1.57442700  |
| C | -8.90230600 | -0.51565400 | 2.18572800  |
| H | -9.74063100 | 0.17872100  | 2.28875900  |
| H | -9.09895800 | -1.16412900 | 1.32623700  |
| H | -8.88033600 | -1.14940900 | 3.08014600  |
| C | -1.70619700 | -1.84228000 | 3.50513500  |
| H | -2.38691700 | -2.57113200 | 3.96244200  |
| H | -0.91558100 | -1.60334300 | 4.21792700  |
| H | -2.25368200 | -0.92600700 | 3.25171700  |



|    |            |             |             |
|----|------------|-------------|-------------|
| Rh | 4.77605300 | -0.12845800 | 0.89278300  |
| O  | 5.45590700 | 1.17823500  | -0.57593300 |
| O  | 3.91810600 | 1.45179700  | 1.93507000  |
| O  | 3.51702900 | 1.00482600  | -1.74269600 |
| O  | 2.03558300 | 1.31330500  | 0.68603100  |
| C  | 4.67912600 | 1.48685900  | -1.53268100 |
| C  | 5.16945800 | 2.52900100  | -2.52593400 |
| C  | 5.86032200 | 3.74851600  | -1.88780400 |
| H  | 6.66267900 | 3.38630400  | -1.23548500 |
| H  | 6.33778800 | 4.32127700  | -2.69189500 |
| C  | 3.17061200 | 4.24706200  | 2.42085000  |
| H  | 2.71182100 | 4.98668000  | 3.08719100  |
| H  | 4.07551400 | 3.88354000  | 2.92122000  |
| C  | 2.18395700 | 3.07402500  | 2.27346300  |
| C  | 2.76528600 | 1.85187300  | 1.58489800  |
| Rh | 2.73066300 | -0.32005400 | -0.36416200 |
| O  | 2.02469200 | -1.60200100 | 1.10776100  |
| O  | 3.58640600 | -1.91378200 | -1.38209400 |
| O  | 3.97407400 | -1.45906100 | 2.25663700  |
| O  | 5.50611900 | -1.72537800 | -0.18766600 |
| C  | 2.80226300 | -1.91839900 | 2.06848900  |
| C  | 2.28725800 | -2.93037300 | 3.07701800  |
| C  | 1.69104000 | -4.21530200 | 2.46979700  |
| H  | 0.86418800 | -3.93290500 | 1.81396000  |
| H  | 1.24842500 | -4.78780100 | 3.29399700  |
| C  | 4.34490500 | -4.69432800 | -1.85505700 |
| H  | 4.78991600 | -5.43915300 | -2.52587200 |
| H  | 3.42492900 | -4.34205800 | -2.33590500 |
| C  | 5.32418000 | -3.51006100 | -1.75329400 |
| C  | 4.75925900 | -2.28461700 | -1.05387000 |
| H  | 3.10589200 | -3.15889000 | 3.76504000  |
| H  | 1.49927700 | -2.42179800 | 3.64553900  |
| H  | 1.86437300 | 2.74504300  | 3.27052700  |
| H  | 1.28766900 | 3.37573900  | 1.72454700  |
| H  | 5.88175600 | 2.01733000  | -3.18561600 |
| H  | 4.31748200 | 2.83102900  | -3.14243400 |
| H  | 6.24145500 | -3.79728400 | -1.23151900 |
| H  | 5.60798300 | -3.18999700 | -2.76395000 |
| C  | 2.67349400 | -5.11589700 | 1.70043600  |
| H  | 3.48910700 | -5.43796500 | 2.36332100  |
| H  | 2.13686100 | -6.02913200 | 1.40814700  |
| C  | 3.25065400 | -4.44198900 | 0.45064100  |
| H  | 2.44303700 | -3.93746900 | -0.09118100 |
| H  | 3.93638100 | -3.65354700 | 0.77157000  |

|   |             |             |             |
|---|-------------|-------------|-------------|
| C | 3.99294900  | -5.37007100 | -0.51675500 |
| H | 3.36813800  | -6.24832800 | -0.73022800 |
| H | 4.90807900  | -5.75232000 | -0.04257400 |
| C | 3.55982400  | 4.93647200  | 1.09981600  |
| H | 2.65794800  | 5.34100900  | 0.61802600  |
| H | 4.19522400  | 5.80104300  | 1.33527400  |
| C | 4.30474700  | 4.00684200  | 0.13517300  |
| H | 5.08294800  | 3.46934800  | 0.68646300  |
| H | 3.60871800  | 3.23922900  | -0.21552200 |
| C | 4.93586900  | 4.68379800  | -1.08572300 |
| H | 5.52521300  | 5.55047100  | -0.75761200 |
| H | 4.15038700  | 5.08252200  | -1.74480000 |
| C | -3.17494100 | -2.78696900 | -1.20493900 |
| C | -3.94246200 | -2.64741800 | -2.50820300 |
| H | -3.24906500 | -2.63480700 | -3.35617400 |
| H | -4.62952400 | -3.48212600 | -2.67146300 |

2

0 1

|   |             |             |             |
|---|-------------|-------------|-------------|
| C | 0.39591600  | 1.58053000  | -0.28671400 |
| C | 0.61851100  | 2.77595500  | -1.22474200 |
| O | 1.68374100  | 3.32694400  | -1.39449300 |
| C | -0.13870200 | 2.17487800  | 1.02134000  |
| O | -0.78128400 | 3.20180300  | 1.09739800  |
| O | -0.52263000 | 3.16426500  | -1.82504400 |
| O | 0.14579100  | 1.39836200  | 2.07828500  |
| C | -0.42174500 | 4.36147300  | -2.61797000 |
| H | 0.31952400  | 4.23552700  | -3.41076000 |
| H | -1.41487900 | 4.51995400  | -3.03695400 |
| H | -0.13011900 | 5.20479300  | -1.98743500 |
| C | -0.43793500 | 1.80051700  | 3.32912100  |
| H | -0.05216900 | 1.09825700  | 4.06666800  |
| H | -0.15527400 | 2.82680600  | 3.57379400  |
| H | -1.52719600 | 1.72920100  | 3.27516700  |
| C | -1.47150900 | -0.79141600 | 0.79767700  |
| C | -0.26765200 | -1.38826600 | 0.37217700  |
| C | 0.30846700  | -2.40024100 | 1.12519500  |
| C | -0.32370300 | -2.82016600 | 2.30662300  |
| C | -1.52837800 | -2.23764800 | 2.70338400  |
| C | -2.12356600 | -1.21360500 | 1.95601100  |
| C | -0.69769900 | 0.53737200  | -0.91814200 |
| C | 0.10708100  | -0.77423500 | -0.97756400 |
| H | 1.24897900  | -2.84158000 | 0.81446800  |
| H | 0.12416300  | -3.60510500 | 2.90794100  |

|   |             |             |             |
|---|-------------|-------------|-------------|
| H | -2.01681100 | -2.57931000 | 3.61184300  |
| H | -3.06162100 | -0.76438600 | 2.26240900  |
| H | -1.02479500 | 0.91157000  | -1.88709000 |
| N | -1.83635100 | 0.22917700  | -0.07660200 |
| C | -5.38342900 | 0.85135700  | 0.78502500  |
| C | -4.50761400 | -0.58458300 | -0.92682800 |
| C | -6.64612300 | 0.26598900  | 0.65160600  |
| H | -5.24530300 | 1.64145000  | 1.51980600  |
| C | -5.75198700 | -1.18146900 | -1.07094400 |
| H | -3.66985500 | -0.92720000 | -1.52663800 |
| C | -6.83326300 | -0.75765000 | -0.28351100 |
| H | -7.45982500 | 0.60672200  | 1.28026300  |
| H | -5.91640900 | -1.98328800 | -1.78316100 |
| O | -8.01381700 | -1.40955300 | -0.50100600 |
| C | 0.01144800  | -1.81345000 | -2.10969700 |
| H | -0.80569400 | -2.52608400 | -1.98189900 |
| H | -0.11188800 | -1.31012600 | -3.07443800 |
| C | 1.40342600  | -2.50828900 | -2.03339100 |
| H | 1.36270000  | -3.46797400 | -1.51554800 |
| H | 1.82191600  | -2.67956200 | -3.02904500 |
| N | 2.26431400  | -1.57097100 | -1.21685300 |
| C | 1.53973000  | -0.29588400 | -1.17229300 |
| C | 1.72766100  | 0.77554500  | -0.11203500 |
| H | 1.60799400  | 0.19663900  | -2.15852900 |
| H | 2.58955700  | 1.42139000  | -0.27336600 |
| H | 1.78517400  | 0.33113800  | 0.87991100  |
| S | 3.88762200  | -1.51093000 | -1.69690000 |
| O | 4.07703200  | -0.56672900 | -2.81039500 |
| O | 4.30635100  | -2.90970700 | -1.83822500 |
| C | 4.62074700  | -0.79168500 | -0.23275100 |
| C | 5.26488700  | 0.43959900  | -0.32423900 |
| C | 4.52330700  | -1.47255000 | 0.98289000  |
| C | 5.81597300  | 0.99931600  | 0.82847500  |
| H | 5.31272500  | 0.94876800  | -1.28032700 |
| C | 5.07455700  | -0.89709000 | 2.12195000  |
| H | 4.01368100  | -2.42842900 | 1.02991900  |
| C | 5.72869600  | 0.34449900  | 2.06301300  |
| H | 6.31377400  | 1.96286500  | 0.76709000  |
| H | 4.99573200  | -1.41449900 | 3.07425800  |
| C | 6.34242800  | 0.94195100  | 3.30537200  |
| H | 5.69868400  | 0.79435500  | 4.17816200  |
| H | 7.30544300  | 0.46725900  | 3.52924400  |
| H | 6.52189100  | 2.01421700  | 3.19038000  |
| C | -9.14177900 | -1.02689900 | 0.27011300  |

|   |             |             |             |
|---|-------------|-------------|-------------|
| H | -9.40904600 | 0.02549900  | 0.10515300  |
| H | -9.96466100 | -1.66142500 | -0.06254600 |
| H | -8.97401200 | -1.18812900 | 1.34344900  |
| C | -4.30333200 | 0.44587400  | 0.00173400  |
| C | -2.95396700 | 1.12923000  | 0.13903300  |
| H | -2.85233200 | 1.93730200  | -0.59313100 |
| H | -2.89192500 | 1.61400600  | 1.12387400  |

## R2

0 1

|   |             |             |             |
|---|-------------|-------------|-------------|
| C | 0.00000400  | 0.19346700  | 0.00004700  |
| C | -1.30320500 | -0.49713300 | -0.00003000 |
| O | -1.45696200 | -1.69539600 | -0.00026600 |
| C | 1.30322000  | -0.49711200 | 0.00011500  |
| O | 1.45697700  | -1.69537600 | 0.00044600  |
| N | -0.00002000 | 1.51286700  | 0.00007200  |
| N | -0.00004200 | 2.64473700  | 0.00008600  |
| O | -2.31588300 | 0.40886700  | 0.00015400  |
| O | 2.31589600  | 0.40888300  | -0.00022700 |
| C | -3.63607400 | -0.16322200 | -0.00010100 |
| H | -3.78691400 | -0.78161800 | 0.88834400  |
| H | -4.32090300 | 0.68431000  | 0.00039500  |
| H | -3.78700500 | -0.78062100 | -0.88922700 |
| C | 3.63608600  | -0.16320700 | -0.00018700 |
| H | 4.32091500  | 0.68432600  | 0.00008200  |
| H | 3.78685600  | -0.78131400 | 0.88847200  |
| H | 3.78708700  | -0.78089300 | -0.88910000 |

## 3

0 1

|   |             |             |             |
|---|-------------|-------------|-------------|
| C | 1.42175100  | -1.91990400 | -0.54368500 |
| C | 0.80490100  | -2.16856100 | -1.92850400 |
| O | 0.84665100  | -1.37461600 | -2.84297000 |
| C | 2.89114100  | -2.35329500 | -0.66223400 |
| O | 3.48801200  | -2.50382300 | -1.70471900 |
| O | 0.24532900  | -3.38318700 | -2.01272900 |
| O | 3.46048200  | -2.49964100 | 0.55121600  |
| C | -0.44353200 | -3.65382900 | -3.24567800 |
| H | 0.25302200  | -3.62226900 | -4.08719100 |
| H | -0.87107400 | -4.64902300 | -3.12968900 |
| H | -1.23006200 | -2.91119700 | -3.39795200 |
| C | 4.88661300  | -2.66817400 | 0.53984700  |
| H | 5.18285400  | -2.72659900 | 1.58665100  |
| H | 5.16434200  | -3.57834600 | 0.00265700  |

|   |             |             |             |
|---|-------------|-------------|-------------|
| H | 5.35833800  | -1.80902900 | 0.05642600  |
| C | 3.11360400  | 0.51114200  | 1.03636300  |
| C | 2.07841100  | 0.19890800  | 1.93642100  |
| C | 2.26981800  | 0.32688700  | 3.30405300  |
| C | 3.50459000  | 0.78377700  | 3.78623000  |
| C | 4.52021600  | 1.11841400  | 2.88677800  |
| C | 4.34119700  | 0.98637700  | 1.50540100  |
| C | 1.40615300  | -0.37056800 | -0.26941500 |
| C | 0.83025200  | -0.14777000 | 1.15198400  |
| H | 1.46564600  | 0.08706000  | 3.99587600  |
| H | 3.66859900  | 0.88429800  | 4.85449700  |
| H | 5.47291100  | 1.48018600  | 3.26356700  |
| H | 5.14390500  | 1.23320900  | 0.81758200  |
| H | 0.77952700  | 0.08463100  | -1.02905400 |
| N | 2.74669300  | 0.22908500  | -0.28211000 |
| C | 2.19891500  | 3.36518900  | -0.56608300 |
| C | 0.99003900  | 2.26569300  | -2.33071600 |
| C | 1.23448400  | 4.37401200  | -0.51538200 |
| H | 3.03769400  | 3.40198400  | 0.12363600  |
| C | 0.01953900  | 3.26033900  | -2.29178900 |
| H | 0.87810400  | 1.43132600  | -3.01839100 |
| C | 0.13474000  | 4.31986000  | -1.38159200 |
| H | 1.34898300  | 5.18469000  | 0.19400600  |
| H | -0.84019000 | 3.23610700  | -2.95309000 |
| O | -0.87395100 | 5.24298500  | -1.41703300 |
| C | -0.25986600 | 0.96349800  | 1.24075900  |
| H | 0.08129200  | 1.82670500  | 1.81586200  |
| H | -0.53027200 | 1.30976000  | 0.24036900  |
| C | -1.44841900 | 0.25297300  | 1.89961700  |
| H | -1.33927700 | 0.23611300  | 2.99063000  |
| H | -2.42034000 | 0.69330900  | 1.67707100  |
| N | -1.37971600 | -1.16693500 | 1.46327200  |
| C | 0.09574200  | -1.46716300 | 1.53448500  |
| C | 0.68338200  | -2.58752200 | 0.65689200  |
| H | 0.25397200  | -1.69829700 | 2.59279400  |
| H | -0.06066900 | -3.30963200 | 0.33133400  |
| H | 1.41237500  | -3.12187200 | 1.26437600  |
| S | -2.18091800 | -1.49931800 | -0.01221000 |
| O | -2.27433900 | -2.95905500 | -0.13357700 |
| O | -1.61378900 | -0.72133000 | -1.13263700 |
| C | -3.82098300 | -0.86308000 | 0.32186300  |
| C | -4.26630600 | 0.26949100  | -0.35682000 |
| C | -4.64531800 | -1.54674900 | 1.21837100  |
| C | -5.56146300 | 0.72997200  | -0.12038700 |

|   |             |             |             |
|---|-------------|-------------|-------------|
| H | -3.60595900 | 0.76829600  | -1.05791300 |
| C | -5.93205400 | -1.06971100 | 1.44323200  |
| H | -4.28046400 | -2.43772500 | 1.71727400  |
| C | -6.40872200 | 0.07381800  | 0.78126900  |
| H | -5.91885200 | 1.60976600  | -0.64797700 |
| H | -6.58340900 | -1.59450800 | 2.13691000  |
| C | -7.80254900 | 0.58415900  | 1.05360800  |
| H | -8.11654900 | 1.31807500  | 0.30695100  |
| H | -8.53070400 | -0.23321500 | 1.05532600  |
| H | -7.85580900 | 1.06611100  | 2.03718000  |
| C | -0.80833500 | 6.34068400  | -0.52121700 |
| H | 0.08731000  | 6.95283800  | -0.69191100 |
| H | -1.69620300 | 6.94430600  | -0.71662600 |
| H | -0.81962400 | 6.01287000  | 0.52722900  |
| C | 2.09529800  | 2.30020500  | -1.46550100 |
| C | 3.06014500  | 1.13367500  | -1.39846600 |
| H | 3.01778400  | 0.54103700  | -2.31616200 |
| H | 4.09118400  | 1.47592700  | -1.27362900 |

4

0 1

|   |             |             |             |
|---|-------------|-------------|-------------|
| C | 0.15010400  | 1.77968900  | -0.48160900 |
| C | -0.16574400 | 1.11408100  | 0.95663100  |
| C | -0.54091400 | 3.13380700  | -0.69366900 |
| O | -0.97538700 | 3.87111800  | 0.16361600  |
| C | 1.65463600  | 2.11335600  | -0.64943500 |
| O | 2.44467600  | 1.50645600  | -1.33700900 |
| O | -0.55073400 | 3.44385900  | -2.00700100 |
| O | 1.98181900  | 3.20330600  | 0.06217900  |
| C | -1.11553100 | 4.72690100  | -2.33240300 |
| H | -0.55794000 | 5.52501600  | -1.83572600 |
| H | -1.03746700 | 4.81444500  | -3.41538500 |
| H | -2.16052000 | 4.77496000  | -2.01623400 |
| C | 3.38940600  | 3.49519500  | 0.13690700  |
| H | 3.46738700  | 4.39279600  | 0.74869800  |
| H | 3.91052200  | 2.66103600  | 0.61294300  |
| H | 3.80155700  | 3.66311800  | -0.86084700 |
| C | 1.85637800  | 0.20659700  | 1.73725000  |
| C | 0.95492200  | 1.27209900  | 1.95102800  |
| C | 1.22811000  | 2.26294000  | 2.87829800  |
| C | 2.41232000  | 2.18526900  | 3.62410700  |
| C | 3.30230900  | 1.12887500  | 3.41240200  |
| C | 3.04330000  | 0.12630800  | 2.46812400  |
| C | -0.05986100 | -0.39582900 | 0.65022500  |

|   |             |             |             |
|---|-------------|-------------|-------------|
| H | 0.53937800  | 3.09289400  | 3.00305500  |
| H | 2.64038800  | 2.94734600  | 4.36280800  |
| H | 4.21793100  | 1.07513800  | 3.99485400  |
| H | 3.74255500  | -0.68602400 | 2.31088800  |
| H | -0.59723200 | -0.98920600 | 1.40675100  |
| N | 1.37630700  | -0.66345800 | 0.73439600  |
| C | 3.77756700  | -1.44748200 | -0.73485800 |
| C | 3.99104200  | -3.31693300 | 0.76270100  |
| C | 5.07763800  | -1.66257700 | -1.19816600 |
| H | 3.20224500  | -0.61550000 | -1.12524800 |
| C | 5.28325200  | -3.54752600 | 0.30686000  |
| H | 3.57823500  | -3.96039000 | 1.53638100  |
| C | 5.83574600  | -2.71912000 | -0.67985900 |
| H | 5.48255900  | -0.99996600 | -1.95351800 |
| H | 5.88871300  | -4.35566200 | 0.70359300  |
| O | 7.11495300  | -3.02144800 | -1.05620500 |
| C | -1.61722100 | 1.34986700  | 1.40646200  |
| H | -1.78702000 | 0.73901800  | 2.29820500  |
| H | -1.80247100 | 2.39088500  | 1.66643700  |
| C | -2.59934700 | 0.93946700  | 0.29449300  |
| H | -3.60581500 | 0.83688700  | 0.70935900  |
| H | -2.65175700 | 1.71907900  | -0.47506200 |
| N | -2.22427600 | -0.36509900 | -0.31350200 |
| C | -0.78339900 | -0.49927500 | -0.68998600 |
| C | -0.26105500 | 0.68665100  | -1.51584800 |
| H | -0.66736200 | -1.45622900 | -1.19865300 |
| H | -1.00879700 | 1.04296100  | -2.22528200 |
| H | 0.62354800  | 0.38607800  | -2.07789900 |
| S | -3.31037500 | -0.86442000 | -1.52414400 |
| O | -2.73117600 | -2.07130500 | -2.12621600 |
| O | -3.71030900 | 0.26959800  | -2.37489100 |
| C | -4.72449800 | -1.32504900 | -0.52638000 |
| C | -4.62086300 | -2.42510100 | 0.32891400  |
| C | -5.90953800 | -0.60212600 | -0.63497100 |
| C | -5.72490500 | -2.79257200 | 1.08876300  |
| H | -3.68972800 | -2.97782400 | 0.38851400  |
| C | -7.00815300 | -0.98690000 | 0.13494900  |
| H | -5.96175100 | 0.24015200  | -1.31592500 |
| C | -6.93310100 | -2.07976300 | 1.00611300  |
| H | -5.65490300 | -3.64828400 | 1.75497500  |
| H | -7.93709600 | -0.42943500 | 0.05387800  |
| C | -8.11284500 | -2.48201400 | 1.85680900  |
| H | -8.26100900 | -3.56653800 | 1.84244100  |
| H | -7.95643800 | -2.19112900 | 2.90251000  |

|   |             |             |             |
|---|-------------|-------------|-------------|
| H | -9.03659800 | -2.00765000 | 1.51543800  |
| C | 7.72615600  | -2.21677000 | -2.05215300 |
| H | 7.81164500  | -1.16927800 | -1.73329400 |
| H | 8.72582500  | -2.62807900 | -2.20150600 |
| H | 7.17535800  | -2.25514200 | -3.00140700 |
| C | 3.21751700  | -2.26851400 | 0.24564500  |
| C | 1.79396700  | -2.06089000 | 0.72462900  |
| H | 1.10544500  | -2.58896800 | 0.05355300  |
| H | 1.66728400  | -2.51452100 | 1.72311100  |

### A-int3-I

0 1

|   |             |             |             |
|---|-------------|-------------|-------------|
| C | -0.33209000 | 0.44422600  | -0.25208900 |
| C | 0.42601700  | 0.77539200  | 0.91768500  |
| O | 1.61840200  | 1.14831500  | 0.96696400  |
| C | 0.33440300  | 0.56911700  | -1.49831700 |
| O | 1.58524800  | 0.73021000  | -1.65181900 |
| O | -0.25930000 | 0.64220600  | 2.07650300  |
| O | -0.42754600 | 0.47366000  | -2.59541800 |
| C | 0.43851500  | 1.07926800  | 3.26052200  |
| H | 0.73305800  | 2.12625200  | 3.16296400  |
| H | -0.27335600 | 0.94929900  | 4.07600000  |
| H | 1.33366400  | 0.47383400  | 3.42380700  |
| C | 0.23825000  | 0.69866100  | -3.85697600 |
| H | -0.56526400 | 0.76137400  | -4.59003900 |
| H | 0.83029200  | 1.61540400  | -3.82776600 |
| H | 0.89654000  | -0.14247100 | -4.08854700 |
| C | -0.10659400 | -2.64510400 | -2.17060500 |
| C | -1.41904700 | -2.41739600 | -1.73093700 |
| C | -2.44674600 | -2.36630400 | -2.66289000 |
| C | -2.12629600 | -2.55925800 | -4.01454900 |
| C | -0.81359600 | -2.80948400 | -4.42632200 |
| C | 0.23412500  | -2.85245600 | -3.49938800 |
| C | 0.08418300  | -2.25881800 | 0.03038000  |
| C | -1.38567500 | -2.28975400 | -0.21912500 |
| H | -3.46123900 | -2.12449400 | -2.37149300 |
| H | -2.91615400 | -2.50225600 | -4.75666500 |
| H | -0.59708000 | -2.95470400 | -5.47974500 |
| H | 1.25885400  | -3.01878800 | -3.81206700 |
| H | 0.57355500  | -2.15332100 | 0.98854800  |
| N | 0.76508400  | -2.56889700 | -1.04624900 |
| C | 2.99450300  | -3.82181700 | 0.96269400  |
| C | 3.38813200  | -1.45386200 | 0.72814300  |
| C | 3.53703000  | -3.79307300 | 2.24806000  |



|    |             |             |             |
|----|-------------|-------------|-------------|
| H  | 2.63511000  | -4.76700600 | 0.56109600  |
| C  | 3.92956900  | -1.40644800 | 2.00349000  |
| H  | 3.33531600  | -0.54014400 | 0.15316300  |
| C  | 4.00455000  | -2.57721200 | 2.77474600  |
| H  | 3.59801800  | -4.71064300 | 2.82035100  |
| H  | 4.30458400  | -0.46977300 | 2.40080600  |
| O  | 4.54336000  | -2.43374500 | 4.01360600  |
| C  | -2.09523100 | -3.48725300 | 0.49357200  |
| H  | -1.91966000 | -4.44004400 | -0.00978900 |
| H  | -1.72715100 | -3.56292800 | 1.52171300  |
| C  | -3.57578900 | -3.07492100 | 0.47646900  |
| H  | -4.06041000 | -3.40754800 | -0.44765100 |
| H  | -4.13511100 | -3.49788600 | 1.31391900  |
| N  | -3.53011500 | -1.59536400 | 0.56268200  |
| C  | -2.13116200 | -1.11074900 | 0.46201500  |
| C  | -1.82945600 | 0.24832400  | -0.17828500 |
| H  | -1.74684400 | -1.06483100 | 1.48716500  |
| H  | -2.27701200 | 1.03232400  | 0.43674400  |
| H  | -2.26844600 | 0.30730900  | -1.17318900 |
| S  | -4.87058900 | -0.77831100 | -0.04754900 |
| O  | -6.00002200 | -1.65075000 | 0.29357900  |
| O  | -4.68261600 | -0.36826900 | -1.45106700 |
| C  | -4.87226600 | 0.70008700  | 0.95080800  |
| C  | -4.83474300 | 0.59085500  | 2.34220800  |
| C  | -4.91711500 | 1.94483000  | 0.32140100  |
| C  | -4.82081800 | 1.75300800  | 3.10806400  |
| H  | -4.80231100 | -0.38706900 | 2.81036100  |
| C  | -4.90540100 | 3.09584200  | 1.10537800  |
| H  | -4.93748800 | 1.99917200  | -0.76112400 |
| C  | -4.84851000 | 3.01999200  | 2.50453200  |
| H  | -4.78430600 | 1.67811600  | 4.19138300  |
| H  | -4.92888300 | 4.06878600  | 0.62277400  |
| C  | -4.78283800 | 4.27624000  | 3.33707200  |
| H  | -5.39937000 | 5.07168300  | 2.90807200  |
| H  | -5.11682300 | 4.09841800  | 4.36302300  |
| H  | -3.75377000 | 4.65268900  | 3.38328400  |
| C  | 4.68554800  | -3.58551400 | 4.83334300  |
| H  | 5.33545800  | -4.33675800 | 4.36615100  |
| H  | 5.14570700  | -3.23938600 | 5.75968000  |
| H  | 3.71364500  | -4.04283100 | 5.06239000  |
| In | 2.63392800  | 2.33350900  | -0.67620700 |
| Cl | 4.60292500  | 1.93498600  | 0.57559200  |
| Cl | 1.04550600  | 4.02113500  | -0.16229600 |
| Cl | 3.46384800  | 2.90805400  | -2.84175600 |

|   |            |             |             |
|---|------------|-------------|-------------|
| C | 2.91081900 | -2.65798600 | 0.19125000  |
| C | 2.24799500 | -2.66644800 | -1.15507100 |
| H | 2.56230400 | -1.81612900 | -1.76706200 |
| H | 2.44619300 | -3.59065700 | -1.70696100 |

**A-int3-R**

0 1

|   |             |             |             |
|---|-------------|-------------|-------------|
| C | 0.62004800  | 0.13365200  | -0.06939900 |
| C | -0.39194500 | 1.11210500  | 0.06191400  |
| O | -1.48320400 | 1.17372400  | -0.55026800 |
| C | 0.55566000  | -0.83049300 | -1.13750600 |
| O | -0.28479900 | -0.97791400 | -2.01438600 |
| O | -0.09508900 | 2.10627300  | 0.96180600  |
| O | 1.69479700  | -1.64620900 | -1.13479000 |
| C | -1.11934200 | 3.09673800  | 1.13955800  |
| H | -2.04373100 | 2.63681500  | 1.49236600  |
| H | -0.72167300 | 3.78854800  | 1.88597200  |
| H | -1.30974300 | 3.62394300  | 0.20102500  |
| C | 1.76499600  | -2.55932700 | -2.22903700 |
| H | 2.68961000  | -3.12395900 | -2.08824800 |
| H | 0.90875700  | -3.23739000 | -2.23928200 |
| H | 1.78864300  | -2.02910600 | -3.18721600 |
| C | 5.84148100  | -0.86791800 | 0.98409400  |
| C | 4.74949300  | -0.30128800 | 1.65717400  |
| C | 4.22695600  | -0.95504400 | 2.76983500  |
| C | 4.79995100  | -2.16751700 | 3.16363400  |
| C | 5.88064800  | -2.72165000 | 2.46158700  |
| C | 6.42812100  | -2.07483000 | 1.35257600  |
| C | 5.41551200  | 1.07276100  | -0.07029500 |
| C | 4.35968000  | 0.96562100  | 0.95160000  |
| H | 3.38278800  | -0.54057300 | 3.31029300  |
| H | 4.39995200  | -2.69130100 | 4.02587600  |
| H | 6.30599200  | -3.66457700 | 2.78983500  |
| H | 7.28139200  | -2.47983900 | 0.82223000  |
| H | 5.49412000  | 1.82624100  | -0.84289900 |
| N | 6.19388100  | 0.00654300  | -0.07834300 |
| C | 9.50399500  | -1.33220500 | -0.59715800 |
| C | 9.05448200  | 0.83056000  | 0.35824500  |
| C | 10.77789700 | -1.33585100 | -0.02232600 |
| H | 9.19510100  | -2.18533300 | -1.19675400 |
| C | 10.31148200 | 0.84075000  | 0.94138000  |
| H | 8.38806100  | 1.67498700  | 0.51519000  |
| C | 11.18562500 | -0.24486200 | 0.75545200  |
| H | 11.43061200 | -2.18506400 | -0.18238900 |

|    |             |             |             |
|----|-------------|-------------|-------------|
| H  | 10.64824300 | 1.67508200  | 1.54712800  |
| O  | 12.39065900 | -0.13693500 | 1.37159500  |
| C  | 4.07172400  | 2.22988100  | 1.80464100  |
| H  | 3.69651800  | 1.91264100  | 2.78061200  |
| H  | 4.98643600  | 2.80197000  | 1.97935800  |
| C  | 2.99857700  | 3.05303300  | 1.03376700  |
| H  | 2.07113900  | 3.12042500  | 1.60814700  |
| H  | 3.33570800  | 4.05670600  | 0.77780300  |
| N  | 2.74214800  | 2.28653600  | -0.18744900 |
| C  | 2.98387700  | 0.88668000  | 0.04476000  |
| C  | 1.83063500  | 0.17105600  | 0.80355800  |
| H  | 3.15926200  | 0.34773900  | -0.88438200 |
| H  | 1.62417200  | 0.69170500  | 1.74106700  |
| H  | 2.17623300  | -0.83782000 | 1.03329700  |
| S  | 2.96287400  | 2.97600700  | -1.72520800 |
| O  | 3.80959100  | 2.03410800  | -2.48574800 |
| O  | 3.41780000  | 4.35471100  | -1.50029500 |
| C  | 1.33228600  | 2.98817700  | -2.41199700 |
| C  | 0.82800700  | 1.81717900  | -2.98255000 |
| C  | 0.52047200  | 4.10578000  | -2.20169000 |
| C  | -0.52071200 | 1.75507300  | -3.31080000 |
| H  | 1.46959500  | 0.95772600  | -3.13214900 |
| C  | -0.82303100 | 4.02837100  | -2.55925200 |
| H  | 0.93735100  | 5.00621200  | -1.76400800 |
| C  | -1.37058900 | 2.84525500  | -3.07914200 |
| H  | -0.92965400 | 0.81799900  | -3.66843200 |
| H  | -1.46728700 | 4.88866500  | -2.39747500 |
| C  | -2.85292900 | 2.70776100  | -3.29538600 |
| H  | -3.30487400 | 2.27259500  | -2.39592900 |
| H  | -3.32837700 | 3.67539700  | -3.48559600 |
| H  | -3.07663300 | 2.03705000  | -4.13006800 |
| C  | 13.32364200 | -1.20149200 | 1.22987600  |
| H  | 13.60609100 | -1.35255800 | 0.18010300  |
| H  | 14.20469600 | -0.90568000 | 1.80042200  |
| H  | 12.92748600 | -2.14084800 | 1.63673100  |
| Rh | -5.06378000 | -1.50020700 | 0.69009500  |
| O  | -4.84112900 | -0.64828800 | 2.58186000  |
| O  | -6.26557800 | 0.08907400  | 0.08009100  |
| O  | -3.06143200 | 0.58691800  | 1.90988200  |
| O  | -4.46916400 | 1.34097200  | -0.51743500 |
| C  | -3.93394700 | 0.21980100  | 2.76337900  |
| C  | -3.87467900 | 0.90035500  | 4.12373200  |
| C  | -5.24389400 | 1.33105700  | 4.68120600  |
| H  | -5.90504400 | 0.45711000  | 4.68064600  |

|    |             |             |             |
|----|-------------|-------------|-------------|
| H  | -5.10408200 | 1.62430800  | 5.72910100  |
| C  | -7.70877700 | 2.60231500  | 0.40002900  |
| H  | -8.41718400 | 3.32872400  | -0.01701000 |
| H  | -8.26588300 | 1.67370200  | 0.56763500  |
| C  | -6.62851700 | 2.33029900  | -0.66283900 |
| C  | -5.71774400 | 1.15388500  | -0.34219800 |
| Rh | -3.15433100 | -0.17885300 | -0.01532800 |
| O  | -3.41262100 | -0.99381000 | -1.90262300 |
| O  | -1.95713200 | -1.76618200 | 0.59416100  |
| O  | -5.14146300 | -2.29418500 | -1.20978800 |
| O  | -3.75439400 | -3.00260300 | 1.22357700  |
| C  | -4.29148600 | -1.89447000 | -2.07229200 |
| C  | -4.32547700 | -2.56551500 | -3.43698700 |
| C  | -2.93928700 | -2.98949700 | -3.96155000 |
| H  | -2.26745200 | -2.12659900 | -3.89682600 |
| H  | -3.04433200 | -3.24472900 | -5.02360700 |
| C  | -0.53592500 | -4.30786400 | 0.30382100  |
| H  | 0.16401900  | -5.03838700 | 0.72999000  |
| H  | 0.03941800  | -3.39815400 | 0.10054600  |
| C  | -1.59184000 | -3.98893100 | 1.37826200  |
| C  | -2.50785500 | -2.82260300 | 1.03696300  |
| H  | -5.00993500 | -3.41692000 | -3.37902700 |
| H  | -4.76370300 | -1.83726200 | -4.13139300 |
| H  | -7.11563000 | 2.09713700  | -1.61822700 |
| H  | -5.99865400 | 3.21020400  | -0.82356600 |
| H  | -3.41696900 | 0.17975200  | 4.81361900  |
| H  | -3.19259300 | 1.75219700  | 4.04390800  |
| H  | -2.22231900 | -4.85886300 | 1.58399400  |
| H  | -1.08276400 | -3.72219800 | 2.31342800  |
| C  | -2.29607500 | -4.17636400 | -3.21917200 |
| H  | -2.93546100 | -5.06684500 | -3.30928100 |
| H  | -1.35311000 | -4.42202300 | -3.72862900 |
| C  | -2.00818200 | -3.86328700 | -1.74639000 |
| H  | -1.55558100 | -2.87055300 | -1.69248300 |
| H  | -2.95869600 | -3.80373000 | -1.20798700 |
| C  | -1.10054200 | -4.86349000 | -1.01767700 |
| H  | -0.25210700 | -5.13065900 | -1.66434100 |
| H  | -1.63931400 | -5.80283900 | -0.82623500 |
| C  | -7.18491800 | 3.13097100  | 1.74881600  |
| H  | -6.65839700 | 4.08412800  | 1.59422200  |
| H  | -8.05064800 | 3.35896900  | 2.38616800  |
| C  | -6.26859900 | 2.13650500  | 2.47128300  |
| H  | -6.72896600 | 1.14388300  | 2.44341500  |
| H  | -5.33622200 | 2.04959800  | 1.90618900  |

|   |             |             |             |
|---|-------------|-------------|-------------|
| C | -5.92785900 | 2.48560300  | 3.92459300  |
| H | -6.84955800 | 2.74737000  | 4.46264700  |
| H | -5.28902400 | 3.38032000  | 3.95785000  |
| C | 8.63115200  | -0.25921000 | -0.41885500 |
| C | 7.26024600  | -0.26189700 | -1.05721400 |
| H | 7.16484000  | 0.50309500  | -1.83334200 |
| H | 7.04646500  | -1.23006100 | -1.51988500 |

A-int4-R

0 1

|   |             |             |             |
|---|-------------|-------------|-------------|
| C | 1.78248400  | -0.10120700 | -0.58482600 |
| C | 0.79608800  | -0.45076000 | -1.68830100 |
| O | -0.12963100 | -1.24030700 | -1.57317300 |
| C | 1.98089500  | -1.34079500 | 0.28486100  |
| O | 2.10814900  | -2.45754700 | -0.16962800 |
| O | 0.97183900  | 0.26821000  | -2.79864200 |
| O | 2.12710000  | -1.04736400 | 1.58578800  |
| C | -0.09254100 | 0.17112200  | -3.78097800 |
| H | -1.04021500 | 0.45012400  | -3.31605000 |
| H | 0.18697900  | 0.86835600  | -4.56932000 |
| H | -0.15690000 | -0.85034500 | -4.16115300 |
| C | 2.57484000  | -2.13154900 | 2.41865200  |
| H | 2.62295100  | -1.71953700 | 3.42493800  |
| H | 1.87633200  | -2.96877200 | 2.36988800  |
| H | 3.56589700  | -2.45979300 | 2.09718100  |
| C | 4.72371400  | 0.24858000  | 0.61048800  |
| C | 4.08338500  | 1.50033200  | 0.71225600  |
| C | 4.20871600  | 2.25371600  | 1.87008700  |
| C | 5.00062100  | 1.76471400  | 2.92226900  |
| C | 5.66615700  | 0.54470800  | 2.79063300  |
| C | 5.53917100  | -0.23534800 | 1.63381400  |
| C | 3.25492500  | 0.34236400  | -1.16459700 |
| C | 3.38928100  | 1.77903700  | -0.62252000 |
| H | 3.67537700  | 3.19318300  | 1.97032100  |
| H | 5.09830400  | 2.34125200  | 3.83684200  |
| H | 6.29024100  | 0.18314200  | 3.60344800  |
| H | 6.05631400  | -1.18323500 | 1.53481700  |
| H | 3.25237700  | 0.26587600  | -2.25160900 |
| N | 4.37905200  | -0.36622500 | -0.58983000 |
| C | 7.15049500  | -2.76602600 | -0.90850600 |
| C | 7.03967500  | -0.55012000 | -1.82473200 |
| C | 8.53218700  | -2.80248500 | -1.12390100 |
| H | 6.66563600  | -3.62842000 | -0.45619500 |
| C | 8.40985900  | -0.56496900 | -2.04258400 |

|    |             |             |             |
|----|-------------|-------------|-------------|
| H  | 6.46215100  | 0.33382400  | -2.07997800 |
| C  | 9.16783700  | -1.69444200 | -1.69452700 |
| H  | 9.09212100  | -3.68435100 | -0.83676400 |
| H  | 8.92421800  | 0.28632700  | -2.47646700 |
| O  | 10.50687000 | -1.60624300 | -1.94544600 |
| C  | 4.06696300  | 2.93633400  | -1.37279600 |
| H  | 5.15456300  | 2.95180900  | -1.27278600 |
| H  | 3.81028400  | 2.89790900  | -2.43698900 |
| C  | 3.40981500  | 4.16721900  | -0.69565900 |
| H  | 4.01569300  | 4.54419300  | 0.13045700  |
| H  | 3.25211000  | 4.99102000  | -1.39409800 |
| N  | 2.09680100  | 3.66465900  | -0.11246000 |
| C  | 1.95406200  | 2.27643700  | -0.59226100 |
| C  | 1.20062600  | 1.17945300  | 0.14122000  |
| H  | 1.59028800  | 2.29783500  | -1.62859400 |
| H  | 0.11653200  | 1.22632600  | 0.06107500  |
| H  | 1.46240600  | 1.15378700  | 1.19766300  |
| S  | 0.78523900  | 4.68856800  | -0.49352600 |
| O  | 0.22128100  | 4.32397300  | -1.80560000 |
| O  | 1.26292600  | 6.05376300  | -0.24595300 |
| C  | -0.43487000 | 4.27753400  | 0.74560800  |
| C  | -1.47749000 | 3.41236700  | 0.41306200  |
| C  | -0.37602200 | 4.89447000  | 1.99588200  |
| C  | -2.48000300 | 3.16980600  | 1.34838500  |
| H  | -1.49515000 | 2.93938800  | -0.56087100 |
| C  | -1.38423900 | 4.63502700  | 2.92303500  |
| H  | 0.43455300  | 5.57839300  | 2.22275700  |
| C  | -2.45165000 | 3.77910200  | 2.61148600  |
| H  | -3.28951900 | 2.48749100  | 1.11176800  |
| H  | -1.34671000 | 5.10983600  | 3.89977900  |
| C  | -3.55738300 | 3.50335100  | 3.60042500  |
| H  | -3.23291900 | 3.68297400  | 4.62938800  |
| H  | -4.41985800 | 4.15286300  | 3.40754900  |
| H  | -3.90134600 | 2.46794400  | 3.51738600  |
| C  | 11.32726600 | -2.71171500 | -1.60245800 |
| H  | 11.03904400 | -3.61831600 | -2.15158100 |
| H  | 12.34430600 | -2.43217800 | -1.88233600 |
| H  | 11.29540300 | -2.92249700 | -0.52490800 |
| Rh | -4.26541400 | -0.99118400 | 0.66064300  |
| O  | -4.51245400 | 0.83018800  | -0.33259700 |
| O  | -5.05714900 | -1.99935300 | -0.96743300 |
| O  | -2.48430200 | 0.66155600  | -1.32877000 |
| O  | -3.03966900 | -2.07837900 | -1.99995800 |
| C  | -3.62230800 | 1.21710200  | -1.15385200 |

|    |             |             |             |
|----|-------------|-------------|-------------|
| C  | -3.90717600 | 2.46507800  | -1.97396200 |
| C  | -5.33774800 | 2.56980100  | -2.53236400 |
| H  | -6.04201100 | 2.42898500  | -1.70469900 |
| H  | -5.47637900 | 3.59378700  | -2.89820600 |
| C  | -6.25123800 | -2.32517800 | -3.61288000 |
| H  | -6.70148100 | -2.99323500 | -4.35663100 |
| H  | -6.93450300 | -2.29524700 | -2.75671800 |
| C  | -4.92491300 | -2.95873800 | -3.15343700 |
| C  | -4.29430600 | -2.29335100 | -1.94245600 |
| Rh | -2.11502400 | -1.16595900 | -0.40212000 |
| O  | -1.90467900 | -3.00642100 | 0.50825200  |
| O  | -1.30651900 | -0.24491200 | 1.28537100  |
| O  | -3.89937600 | -2.79895900 | 1.56983400  |
| O  | -3.34089600 | -0.05030400 | 2.26028100  |
| C  | -2.80850600 | -3.40562800 | 1.31016200  |
| C  | -2.56582400 | -4.72318700 | 2.02552700  |
| C  | -1.13443300 | -4.89441100 | 2.56801800  |
| H  | -0.43097200 | -4.70751300 | 1.74862400  |
| H  | -1.00895500 | -5.94226100 | 2.86520300  |
| C  | -0.13133700 | -0.10738900 | 3.96598900  |
| H  | 0.32525600  | 0.50684700  | 4.75146000  |
| H  | 0.56354100  | -0.11298400 | 3.12192100  |
| C  | -1.42540900 | 0.59607100  | 3.52395400  |
| C  | -2.07004700 | 0.05317000  | 2.25971600  |
| H  | -3.31010600 | -4.81370900 | 2.82203700  |
| H  | -2.77192200 | -5.51427600 | 1.29346300  |
| H  | -5.10264500 | -4.00467000 | -2.87277500 |
| H  | -4.18398800 | -2.95914600 | -3.95804100 |
| H  | -3.72427300 | 3.31657200  | -1.30754300 |
| H  | -3.16010500 | 2.52189900  | -2.77123200 |
| H  | -2.18143700 | 0.57730900  | 4.31419700  |
| H  | -1.19742400 | 1.64657100  | 3.31583600  |
| C  | -0.78412700 | -3.98656200 | 3.76132100  |
| H  | -1.44143400 | -4.21788100 | 4.61138800  |
| H  | 0.23648500  | -4.22906900 | 4.08957700  |
| C  | -0.86869600 | -2.49440900 | 3.42490800  |
| H  | -0.35568100 | -2.31255100 | 2.47588700  |
| H  | -1.91724100 | -2.23434000 | 3.24943600  |
| C  | -0.30992500 | -1.54352100 | 4.48810000  |
| H  | 0.66672100  | -1.90976700 | 4.83279300  |
| H  | -0.96238500 | -1.54332400 | 5.37268400  |
| C  | -6.12426800 | -0.91346500 | -4.21454800 |
| H  | -5.48024000 | -0.94580800 | -5.10507500 |
| H  | -7.11663500 | -0.59883500 | -4.56485400 |

|   |             |             |             |
|---|-------------|-------------|-------------|
| C | -5.58695700 | 0.11775700  | -3.21628500 |
| H | -6.11966600 | 0.00444300  | -2.26648400 |
| H | -4.53954500 | -0.11805000 | -3.00252900 |
| C | -5.67182400 | 1.58013600  | -3.66279200 |
| H | -6.68767300 | 1.79589600  | -4.02034300 |
| H | -5.00166500 | 1.75340900  | -4.51701800 |
| C | 6.38550500  | -1.65326400 | -1.25634000 |
| C | 4.88274800  | -1.65099500 | -1.03749500 |
| H | 4.35749500  | -1.88731000 | -1.96940400 |
| H | 4.60991500  | -2.45167600 | -0.33703400 |

A-TS3-I

0 1

|   |             |             |             |
|---|-------------|-------------|-------------|
| C | -0.11398500 | 0.29453400  | -0.32221700 |
| C | 0.63245700  | 0.64481000  | 0.83558100  |
| O | 1.87737400  | 0.75114300  | 0.92965500  |
| C | 0.57741800  | 0.20485000  | -1.54310900 |
| O | 1.82744600  | 0.34692900  | -1.71952200 |
| O | -0.12250500 | 0.87320500  | 1.93968000  |
| O | -0.17334100 | -0.06840300 | -2.63174900 |
| C | 0.59163400  | 1.40700200  | 3.07222000  |
| H | 1.10683400  | 2.32787100  | 2.79003300  |
| H | -0.17360500 | 1.60176500  | 3.82456200  |
| H | 1.32442200  | 0.68629500  | 3.44247700  |
| C | 0.50425500  | 0.00688500  | -3.90165100 |
| H | -0.28165300 | -0.11606300 | -4.64651600 |
| H | 1.01525800  | 0.96529800  | -4.01401400 |
| H | 1.24677600  | -0.79098700 | -3.99288800 |
| C | -1.67183200 | -2.77692900 | -2.13285900 |
| C | -2.87499700 | -2.40777900 | -1.49861500 |
| C | -3.95634500 | -1.98749300 | -2.27874000 |
| C | -3.80153200 | -1.96146500 | -3.66438900 |
| C | -2.59471200 | -2.34592800 | -4.27461400 |
| C | -1.50265100 | -2.75922600 | -3.51420800 |
| C | -1.33616600 | -3.04755400 | 0.06148100  |
| C | -2.66417600 | -2.53106500 | -0.05233600 |
| H | -4.87964000 | -1.65827600 | -1.81713300 |
| H | -4.62917400 | -1.63430500 | -4.28573200 |
| H | -2.50927800 | -2.31612400 | -5.35630500 |
| H | -0.56389900 | -3.03959600 | -3.97841900 |
| H | -0.78057600 | -3.29056700 | 0.95651300  |
| N | -0.74935500 | -3.13650800 | -1.13129500 |
| C | 1.55203300  | -4.66299400 | 0.62935000  |
| C | 2.24600700  | -2.38143800 | 0.26796100  |



|    |             |             |             |
|----|-------------|-------------|-------------|
| C  | 2.28076100  | -4.70375600 | 1.82021800  |
| H  | 1.00647100  | -5.54963600 | 0.31260300  |
| C  | 2.97869300  | -2.40516000 | 1.44484000  |
| H  | 2.25796700  | -1.47981800 | -0.33087100 |
| C  | 2.99576800  | -3.56774500 | 2.23260500  |
| H  | 2.29506000  | -5.61626400 | 2.40372000  |
| H  | 3.55195900  | -1.53536600 | 1.74870000  |
| O  | 3.73303100  | -3.49648500 | 3.37202400  |
| C  | -3.78948400 | -2.77937200 | 0.93442300  |
| H  | -4.73825800 | -2.70687500 | 0.39559500  |
| H  | -3.73895600 | -3.78524300 | 1.36214000  |
| C  | -3.77587500 | -1.71682100 | 2.06830300  |
| H  | -4.74277200 | -1.59520900 | 2.55433700  |
| H  | -3.03154100 | -1.96936600 | 2.83184500  |
| N  | -3.35540900 | -0.45992100 | 1.44287800  |
| C  | -2.16608800 | -0.64253800 | 0.76450800  |
| C  | -1.61808300 | 0.30930400  | -0.26316100 |
| H  | -1.42038800 | -1.04443300 | 1.44026100  |
| H  | -1.94491000 | 1.31251400  | 0.01994700  |
| H  | -2.06380400 | 0.11035100  | -1.23934600 |
| S  | -4.61979300 | 0.63187100  | 0.89773000  |
| O  | -5.69564600 | 0.40885800  | 1.86405300  |
| O  | -4.85156700 | 0.44621500  | -0.53859700 |
| C  | -3.79830900 | 2.18897500  | 1.15443900  |
| C  | -3.15816600 | 2.43566400  | 2.37168200  |
| C  | -3.68730100 | 3.07388200  | 0.07836000  |
| C  | -2.35112100 | 3.56206700  | 2.48514100  |
| H  | -3.25105400 | 1.73514100  | 3.19407600  |
| C  | -2.87895700 | 4.19831600  | 0.21838300  |
| H  | -4.18042500 | 2.84928800  | -0.86071000 |
| C  | -2.16964500 | 4.44154000  | 1.40510700  |
| H  | -1.82301300 | 3.74724800  | 3.41575400  |
| H  | -2.76195900 | 4.87707300  | -0.62103800 |
| C  | -1.18331700 | 5.57502500  | 1.49215600  |
| H  | -1.48500300 | 6.42094100  | 0.86831100  |
| H  | -1.06021500 | 5.92617100  | 2.52049000  |
| H  | -0.20396500 | 5.23162000  | 1.13466500  |
| C  | 3.84489600  | -4.65541500 | 4.18481500  |
| H  | 4.30015400  | -5.49119800 | 3.63752900  |
| H  | 4.49214500  | -4.37688100 | 5.01744700  |
| H  | 2.86913800  | -4.97256700 | 4.57740000  |
| In | 3.10810800  | 1.69488200  | -0.65931700 |
| Cl | 4.95314300  | 0.74616400  | 0.47591900  |
| Cl | 1.94508300  | 3.69314600  | 0.04638800  |

|    |            |             |             |
|----|------------|-------------|-------------|
| Cl | 3.97207900 | 2.36775900  | -2.77830100 |
| C  | 1.51689000 | -3.50546400 | -0.15439400 |
| C  | 0.68144400 | -3.43778100 | -1.40299400 |
| H  | 1.03702100 | -2.64143500 | -2.06279800 |
| H  | 0.70299200 | -4.37895800 | -1.96305800 |

A-TS3-n

0 1

|   |             |             |             |
|---|-------------|-------------|-------------|
| C | 0.05403200  | -0.31606500 | 1.57606400  |
| C | 0.46518400  | -1.68346700 | 1.62114300  |
| O | 1.32714800  | -2.24209100 | 2.29278900  |
| C | 0.61989600  | 0.63519700  | 2.47722400  |
| O | 1.65535800  | 0.55255800  | 3.14322800  |
| O | -0.30296800 | -2.45919000 | 0.71901300  |
| O | -0.14778600 | 1.79914800  | 2.55902900  |
| C | 0.03890600  | -3.84046800 | 0.69839300  |
| H | -0.08222500 | -4.29860100 | 1.68504200  |
| H | -0.64117500 | -4.30821200 | -0.01863300 |
| H | 1.07770100  | -3.99312800 | 0.38528100  |
| C | 0.26644300  | 2.71658000  | 3.56376700  |
| H | -0.38683000 | 3.58551700  | 3.46317600  |
| H | 0.16684800  | 2.27948300  | 4.56346100  |
| H | 1.30948700  | 3.02040800  | 3.43462000  |
| C | 1.31601800  | 2.94808300  | -0.05571600 |
| C | 0.19772500  | 2.77784500  | -0.89986800 |
| C | -0.81042800 | 3.74649300  | -0.89343000 |
| C | -0.67010500 | 4.84648600  | -0.04910900 |
| C | 0.45779100  | 4.99781600  | 0.77550300  |
| C | 1.47456400  | 4.04608700  | 0.78460300  |
| C | 1.66671600  | 1.06244800  | -1.19844100 |
| C | 0.39861100  | 1.53238100  | -1.64258000 |
| H | -1.69368800 | 3.63164300  | -1.50977600 |
| H | -1.44807300 | 5.60332100  | -0.02816600 |
| H | 0.53736000  | 5.86802300  | 1.41949000  |
| H | 2.34288400  | 4.15007100  | 1.42491200  |
| H | 2.20157000  | 0.17407300  | -1.50166600 |
| N | 2.18283200  | 1.86613500  | -0.26237100 |
| C | 4.94619100  | 0.17946100  | -0.84628200 |
| C | 3.67575800  | -0.83063100 | 0.94207500  |
| C | 5.46272100  | -1.06931600 | -1.20231900 |
| H | 5.24764900  | 1.05756600  | -1.41369600 |
| C | 4.16912600  | -2.07821200 | 0.58832100  |
| H | 2.99074500  | -0.74849700 | 1.78095300  |
| C | 5.06518200  | -2.20616700 | -0.48348500 |

|   |             |             |             |
|---|-------------|-------------|-------------|
| H | 6.16274200  | -1.14151200 | -2.02583600 |
| H | 3.85776800  | -2.96052700 | 1.13603200  |
| O | 5.49244100  | -3.47537500 | -0.75019100 |
| C | -0.18971100 | 1.28392600  | -3.01745600 |
| H | -0.89938100 | 2.08746900  | -3.23546100 |
| H | 0.57835300  | 1.31902700  | -3.79686300 |
| C | -0.94308800 | -0.06864600 | -3.09274900 |
| H | -1.65047900 | -0.11488400 | -3.91901300 |
| H | -0.24472400 | -0.90729900 | -3.18034000 |
| N | -1.64080000 | -0.22608500 | -1.80900900 |
| C | -0.74714700 | -0.14843900 | -0.76559000 |
| C | -1.09145600 | 0.06880000  | 0.67683000  |
| H | 0.08121400  | -0.82626300 | -0.92874900 |
| H | -1.97119000 | -0.56585500 | 0.86166200  |
| H | -1.41204500 | 1.09954200  | 0.83636100  |
| S | -3.24496000 | 0.47128700  | -1.70763800 |
| O | -3.75650500 | 0.36739200  | -3.07613800 |
| O | -3.19585700 | 1.76657900  | -1.02452500 |
| C | -4.05357400 | -0.71171600 | -0.65046100 |
| C | -4.06169800 | -2.06058200 | -1.01092000 |
| C | -4.68173400 | -0.25892500 | 0.50923600  |
| C | -4.70035600 | -2.97004700 | -0.17601600 |
| H | -3.56536900 | -2.39005400 | -1.91683300 |
| C | -5.32299300 | -1.18676600 | 1.32620300  |
| H | -4.64675500 | 0.79310400  | 0.76800600  |
| C | -5.33503800 | -2.55058200 | 1.00396500  |
| H | -4.70408000 | -4.02377200 | -0.43928400 |
| H | -5.81109300 | -0.84665000 | 2.23473800  |
| C | -5.98275000 | -3.55494400 | 1.92352800  |
| H | -6.40093600 | -4.39773200 | 1.36571200  |
| H | -5.24498800 | -3.96073400 | 2.62617600  |
| H | -6.78347900 | -3.10127100 | 2.51374600  |
| C | 6.42142900  | -3.66674600 | -1.80450000 |
| H | 7.35737800  | -3.12045200 | -1.62677400 |
| H | 6.63188400  | -4.73705400 | -1.83136600 |
| H | 6.00801500  | -3.35764700 | -2.77435500 |
| C | 4.05126300  | 0.31206600  | 0.21796300  |
| C | 3.40987000  | 1.63209600  | 0.54279100  |
| H | 3.10002300  | 1.65956200  | 1.59108000  |
| H | 4.08130700  | 2.47397000  | 0.34046000  |

A-TS3-R

O 1

|   |            |            |            |
|---|------------|------------|------------|
| C | 0.73133000 | 0.50415200 | 0.18053500 |
|---|------------|------------|------------|

|   |             |             |             |
|---|-------------|-------------|-------------|
| C | -0.41820500 | 1.31995900  | 0.32154000  |
| O | -1.48546200 | 1.26523600  | -0.32905400 |
| C | 0.85466900  | -0.39204700 | -0.93901400 |
| O | 0.08510300  | -0.60179200 | -1.86636800 |
| O | -0.29067700 | 2.28844900  | 1.28394700  |
| O | 2.10110800  | -1.03635300 | -0.92313600 |
| C | -1.44529800 | 3.12337200  | 1.46407000  |
| H | -2.31593300 | 2.52478800  | 1.73928300  |
| H | -1.17764200 | 3.81258300  | 2.26809700  |
| H | -1.66201500 | 3.67866600  | 0.54699700  |
| C | 2.34543900  | -1.86625900 | -2.05718200 |
| H | 3.33808200  | -2.29787400 | -1.90344000 |
| H | 1.60194800  | -2.66202800 | -2.13892400 |
| H | 2.32558100  | -1.28762800 | -2.98706400 |
| C | 5.51029700  | -0.17604500 | 1.41217100  |
| C | 4.68931500  | 0.71686200  | 2.12371500  |
| C | 4.23795000  | 0.36675700  | 3.39548900  |
| C | 4.60489900  | -0.87588900 | 3.91365300  |
| C | 5.40410000  | -1.76272200 | 3.17367400  |
| C | 5.87571400  | -1.42654800 | 1.90447900  |
| C | 5.30947800  | 1.65819300  | 0.13055100  |
| C | 4.43062200  | 1.88685300  | 1.25232800  |
| H | 3.60179000  | 1.03937500  | 3.96218400  |
| H | 4.26145500  | -1.16655900 | 4.90135900  |
| H | 5.66815800  | -2.72567600 | 3.59897900  |
| H | 6.51275400  | -2.09696000 | 1.34054400  |
| H | 5.41215600  | 2.28606400  | -0.74575200 |
| N | 5.85140200  | 0.44169400  | 0.18583500  |
| C | 8.45276500  | -1.90422700 | -0.77330000 |
| C | 8.85689500  | 0.30935600  | 0.07928600  |
| C | 9.75744900  | -2.28346300 | -0.44499000 |
| H | 7.79322400  | -2.63477200 | -1.23577700 |
| C | 10.15178000 | -0.05157100 | 0.41763600  |
| H | 8.51059500  | 1.31734700  | 0.29228100  |
| C | 10.61416300 | -1.35316600 | 0.15599900  |
| H | 10.08584300 | -3.29373800 | -0.65546800 |
| H | 10.83177800 | 0.65194200  | 0.88586900  |
| O | 11.89738600 | -1.60389400 | 0.52596700  |
| C | 4.19054200  | 3.29770400  | 1.80598600  |
| H | 4.37074700  | 3.32110900  | 2.88424700  |
| H | 4.88562700  | 4.00147300  | 1.33996000  |
| C | 2.73858600  | 3.70662100  | 1.44439300  |
| H | 2.01763300  | 3.36604600  | 2.19254200  |
| H | 2.61946300  | 4.77981300  | 1.30589700  |

|    |             |             |             |
|----|-------------|-------------|-------------|
| N  | 2.45426900  | 2.99394200  | 0.20310700  |
| C  | 2.85399300  | 1.64704700  | 0.31121500  |
| C  | 1.90879600  | 0.70350400  | 1.08040500  |
| H  | 3.09667400  | 1.19834500  | -0.64756500 |
| H  | 1.62283400  | 1.13341900  | 2.04047000  |
| H  | 2.43886100  | -0.23030900 | 1.26145000  |
| S  | 2.65443300  | 3.80551900  | -1.30770800 |
| O  | 3.65052800  | 3.03735000  | -2.07977900 |
| O  | 2.89357200  | 5.21543500  | -0.97932800 |
| C  | 1.05722100  | 3.60319300  | -2.03898200 |
| C  | 0.74145000  | 2.38564100  | -2.64818400 |
| C  | 0.09173800  | 4.59197000  | -1.83559400 |
| C  | -0.57159200 | 2.14819400  | -3.03396300 |
| H  | 1.49915100  | 1.62533400  | -2.79007300 |
| C  | -1.21218900 | 4.34234000  | -2.25608600 |
| H  | 0.36377300  | 5.52735700  | -1.35911600 |
| C  | -1.56918300 | 3.11213500  | -2.82996000 |
| H  | -0.83401700 | 1.17231900  | -3.42458500 |
| H  | -1.97351100 | 5.10376700  | -2.10889900 |
| C  | -3.00367100 | 2.79119600  | -3.14842600 |
| H  | -3.43827800 | 2.22384900  | -2.31712400 |
| H  | -3.59987200 | 3.69713000  | -3.29669500 |
| H  | -3.08476500 | 2.16956800  | -4.04523700 |
| C  | 12.43160200 | -2.89975500 | 0.28502200  |
| H  | 12.43396400 | -3.14242000 | -0.78546000 |
| H  | 13.45907100 | -2.87319300 | 0.64983300  |
| H  | 11.87470600 | -3.67346700 | 0.82933200  |
| Rh | -4.72680800 | -1.97936300 | 0.35454300  |
| O  | -4.91452700 | -1.17764500 | 2.27039200  |
| O  | -6.08953600 | -0.58404400 | -0.37930800 |
| O  | -3.27932200 | 0.34673600  | 1.88645100  |
| O  | -4.46205300 | 0.96721700  | -0.68731700 |
| C  | -4.19468000 | -0.18449200 | 2.59622600  |
| C  | -4.43850700 | 0.44264900  | 3.96189300  |
| C  | -5.92286100 | 0.61189300  | 4.33427400  |
| H  | -6.41754500 | -0.35975100 | 4.22452000  |
| H  | -5.97511700 | 0.87809100  | 5.39725400  |
| C  | -7.96459000 | 1.64670100  | -0.22379300 |
| H  | -8.71703300 | 2.26704500  | -0.72605000 |
| H  | -8.37768700 | 0.63376700  | -0.15894000 |
| C  | -6.71370900 | 1.60050500  | -1.12036200 |
| C  | -5.67435600 | 0.57320400  | -0.69603500 |
| Rh | -2.98613200 | -0.34027000 | -0.05233800 |
| O  | -2.86014100 | -1.09764200 | -1.97737300 |

|   |             |             |             |
|---|-------------|-------------|-------------|
| O | -1.62811300 | -1.73652300 | 0.66776300  |
| O | -4.41396500 | -2.69784000 | -1.55317100 |
| O | -3.26330100 | -3.26816300 | 1.03570400  |
| C | -3.54145600 | -2.12401100 | -2.28413000 |
| C | -3.28280600 | -2.73038700 | -3.65482500 |
| C | -1.78847100 | -2.91922800 | -3.98413600 |
| H | -1.27008500 | -1.97306500 | -3.79446300 |
| H | -1.70406100 | -3.13354500 | -5.05701900 |
| C | 0.21193300  | -4.01039100 | 0.52719100  |
| H | 0.96528100  | -4.62835900 | 1.03272000  |
| H | 0.65109500  | -3.01447300 | 0.39928200  |
| C | -1.00541300 | -3.89572400 | 1.46361600  |
| C | -2.05023200 | -2.88311800 | 1.01936500  |
| H | -3.82939400 | -3.67599500 | -3.71574000 |
| H | -3.72657900 | -2.04446000 | -4.38760500 |
| H | -7.01382400 | 1.33622300  | -2.14243600 |
| H | -6.22241600 | 2.57690700  | -1.16695400 |
| H | -3.95689800 | -0.21548800 | 4.69653700  |
| H | -3.91037400 | 1.40053900  | 3.99000400  |
| H | -1.50526800 | -4.86154300 | 1.58158100  |
| H | -0.66498100 | -3.57651900 | 2.45700900  |
| C | -1.08299500 | -4.03516600 | -3.19012900 |
| H | -1.55560300 | -5.00591200 | -3.39936600 |
| H | -0.05060300 | -4.11112300 | -3.56169200 |
| C | -1.05978300 | -3.75635800 | -1.68238800 |
| H | -0.80826600 | -2.70322700 | -1.54061000 |
| H | -2.06988500 | -3.89054700 | -1.28391500 |
| C | -0.08942500 | -4.61402600 | -0.85780300 |
| H | 0.86337600  | -4.71513600 | -1.39735100 |
| H | -0.47967700 | -5.63549100 | -0.74338800 |
| C | -7.73143400 | 2.19254100  | 1.19780700  |
| H | -7.35815600 | 3.22559400  | 1.14163700  |
| H | -8.70301200 | 2.24489500  | 1.70846200  |
| C | -6.76830800 | 1.33061100  | 2.02208900  |
| H | -7.04744800 | 0.27831300  | 1.90934300  |
| H | -5.76654400 | 1.42149800  | 1.59263700  |
| C | -6.68990600 | 1.66730900  | 3.51520600  |
| H | -7.70623500 | 1.74606600  | 3.92559100  |
| H | -6.22570700 | 2.65459900  | 3.65505000  |
| C | 7.98717500  | -0.61399200 | -0.52159400 |
| C | 6.58130300  | -0.21395200 | -0.90804000 |
| H | 6.57734300  | 0.49065800  | -1.74552100 |
| H | 5.99950400  | -1.08928600 | -1.21570600 |

## A-TS4-I

0 1

|   |             |             |             |
|---|-------------|-------------|-------------|
| C | 0.21727800  | -0.14914300 | -0.14377000 |
| C | -0.57655400 | -0.39959700 | 1.08107100  |
| O | -1.70497900 | -0.89503400 | 1.15159800  |
| C | -0.42137000 | -0.69614500 | -1.35282000 |
| O | -1.66479000 | -0.73566400 | -1.50316200 |
| O | 0.03034300  | 0.04457200  | 2.18492000  |
| O | 0.38393800  | -1.08388600 | -2.31489100 |
| C | -0.71659400 | -0.10748900 | 3.41798000  |
| H | -0.94433100 | -1.16054600 | 3.59188400  |
| H | -0.06228000 | 0.28613600  | 4.19456800  |
| H | -1.64830300 | 0.45981600  | 3.35943400  |
| C | -0.23804400 | -1.56216700 | -3.53806700 |
| H | 0.58591800  | -1.95401500 | -4.13071700 |
| H | -0.97917400 | -2.33005800 | -3.31214100 |
| H | -0.71473600 | -0.71934100 | -4.04254700 |
| C | 0.12028500  | 2.11350100  | -2.53676000 |
| C | 1.45348100  | 1.91459700  | -2.12017500 |
| C | 2.44242600  | 1.70317100  | -3.06932500 |
| C | 2.08576600  | 1.69736500  | -4.42783600 |
| C | 0.76579100  | 1.91744800  | -4.82403700 |
| C | -0.24757500 | 2.12515700  | -3.87784800 |
| C | 0.00801400  | 1.83954700  | -0.30362700 |
| C | 1.47738400  | 2.06673400  | -0.59866800 |
| H | 3.46255800  | 1.48835700  | -2.77753500 |
| H | 2.84945200  | 1.51174000  | -5.17628000 |
| H | 0.51111300  | 1.91147600  | -5.87964500 |
| H | -1.27894600 | 2.26970500  | -4.18116700 |
| H | -0.40338900 | 2.10319600  | 0.66342900  |
| N | -0.71096500 | 2.23416900  | -1.40746100 |
| C | -2.53890600 | 3.82965200  | 0.58709000  |
| C | -3.47277000 | 1.61501200  | 0.52626000  |
| C | -2.98842900 | 3.99457500  | 1.89838100  |
| H | -1.99161300 | 4.63897200  | 0.10913400  |
| C | -3.92741200 | 1.75718700  | 1.83037900  |
| H | -3.67226400 | 0.68669900  | 0.00700600  |
| C | -3.67970900 | 2.94774800  | 2.52937000  |
| H | -2.79912700 | 4.92919200  | 2.41230600  |
| H | -4.46737800 | 0.95074400  | 2.31428800  |
| O | -4.14321100 | 2.98964700  | 3.80946500  |
| C | 2.17572700  | 3.38675000  | -0.18503200 |
| H | 1.98414600  | 4.21486500  | -0.86992800 |
| H | 1.85370100  | 3.68123500  | 0.81962300  |

|    |             |             |             |
|----|-------------|-------------|-------------|
| C  | 3.66955000  | 2.97345300  | -0.18133300 |
| H  | 4.10871900  | 3.10334100  | -1.17541700 |
| H  | 4.26724200  | 3.55241700  | 0.52587800  |
| N  | 3.64735000  | 1.53384100  | 0.21246100  |
| C  | 2.24473100  | 1.09043000  | 0.29011300  |
| C  | 1.74741800  | -0.31265900 | -0.03025300 |
| H  | 1.92323700  | 1.30150700  | 1.31850700  |
| H  | 2.01050300  | -1.02909200 | 0.74976700  |
| H  | 2.15556500  | -0.66525600 | -0.97575400 |
| S  | 4.89936400  | 0.54502900  | -0.29463900 |
| O  | 6.09699500  | 1.38697300  | -0.20257000 |
| O  | 4.59827000  | -0.14194700 | -1.56428200 |
| C  | 4.87239200  | -0.69764300 | 0.99041900  |
| C  | 4.98208800  | -0.30700900 | 2.32724100  |
| C  | 4.74226800  | -2.04061200 | 0.63764300  |
| C  | 4.94524600  | -1.28176800 | 3.31926900  |
| H  | 5.07800900  | 0.74379000  | 2.57905000  |
| C  | 4.70757900  | -3.00317500 | 1.64563000  |
| H  | 4.64945600  | -2.31391800 | -0.40732700 |
| C  | 4.80715600  | -2.64168300 | 2.99591400  |
| H  | 5.02064400  | -0.98617500 | 4.36232100  |
| H  | 4.59221600  | -4.04978000 | 1.37842200  |
| C  | 4.79138900  | -3.69162600 | 4.07945200  |
| H  | 5.81337500  | -3.99558900 | 4.33712700  |
| H  | 4.32286700  | -3.31693500 | 4.99435100  |
| H  | 4.25269800  | -4.58838700 | 3.76116100  |
| C  | -3.96127500 | 4.18271700  | 4.55785800  |
| H  | -4.45655300 | 5.03928600  | 4.08211000  |
| H  | -4.41825400 | 3.99981100  | 5.53141400  |
| H  | -2.89714500 | 4.41687200  | 4.69771100  |
| In | -2.81039800 | -2.23008400 | -0.37393700 |
| Cl | -4.65194000 | -1.81952200 | 1.02598000  |
| Cl | -1.05382400 | -3.76036300 | 0.04795800  |
| Cl | -3.76880900 | -2.85075600 | -2.45252800 |
| C  | -2.76400000 | 2.63958300  | -0.11290400 |
| C  | -2.17099500 | 2.42204000  | -1.48148600 |
| H  | -2.62381200 | 1.55188700  | -1.96643100 |
| H  | -2.33790800 | 3.29350700  | -2.12580800 |

B-int3-I

0 1

|   |             |             |             |
|---|-------------|-------------|-------------|
| C | -0.11177100 | -1.12166600 | 0.44322800  |
| C | 0.15255300  | -1.85084000 | -0.85557000 |
| O | 1.25157300  | -1.84834400 | -1.40962300 |



|   |             |             |             |
|---|-------------|-------------|-------------|
| C | 0.97342600  | -1.51843900 | 1.43940200  |
| O | 2.14559000  | -1.74294800 | 1.14601800  |
| O | -0.89185400 | -2.44171600 | -1.39946600 |
| O | 0.55772400  | -1.56654600 | 2.69129500  |
| C | -0.66609900 | -3.07061400 | -2.69017000 |
| H | 0.11585400  | -3.82682300 | -2.60226900 |
| H | -1.62355700 | -3.51516000 | -2.95548600 |
| H | -0.36404600 | -2.31557300 | -3.41787700 |
| C | 1.59756800  | -1.70927300 | 3.69799500  |
| H | 1.07091800  | -1.68291000 | 4.64970700  |
| H | 2.12473000  | -2.65399100 | 3.55737200  |
| H | 2.29506800  | -0.87458800 | 3.60722000  |
| C | 1.52159600  | 1.38136400  | 1.59212800  |
| C | 0.27000200  | 1.43372900  | 2.22601000  |
| C | 0.17080700  | 1.79907700  | 3.56382800  |
| C | 1.33701400  | 2.12588400  | 4.26544500  |
| C | 2.57969300  | 2.08770800  | 3.62184600  |
| C | 2.69077900  | 1.70920500  | 2.27951300  |
| C | 0.04265600  | 0.46297800  | 0.10742000  |
| C | -0.81510900 | 1.13466800  | 1.21152800  |
| H | -0.79784200 | 1.83945600  | 4.05573700  |
| H | 1.27775200  | 2.41167000  | 5.31126200  |
| H | 3.47956100  | 2.34019500  | 4.17478900  |
| H | 3.65595100  | 1.63707700  | 1.79311300  |
| H | -0.34899800 | 0.62808900  | -0.89453600 |
| N | 1.41544800  | 0.92678700  | 0.24473100  |
| C | 0.22966500  | 3.16936000  | -2.07489800 |
| C | 1.28256400  | 4.16399600  | -0.15659500 |
| C | -0.58780700 | 4.29312000  | -2.22942800 |
| H | 0.12918500  | 2.34702000  | -2.77908700 |
| C | 0.48062900  | 5.28865200  | -0.29403500 |
| H | 2.00714000  | 4.11916600  | 0.65117000  |
| C | -0.46913700 | 5.35690100  | -1.32711200 |
| H | -1.30193800 | 4.32388100  | -3.04313800 |
| H | 0.56744700  | 6.13296800  | 0.38200400  |
| O | -1.21565600 | 6.49665600  | -1.36586100 |
| C | -1.60450400 | 2.42024500  | 0.82506400  |
| H | -1.13293700 | 3.32213000  | 1.21542300  |
| H | -1.66679700 | 2.52516600  | -0.25979500 |
| C | -3.00089100 | 2.16017500  | 1.40437300  |
| H | -3.02319100 | 2.31873300  | 2.48876800  |
| H | -3.79988800 | 2.74846300  | 0.95560200  |
| N | -3.22664400 | 0.70498200  | 1.18487900  |
| C | -1.91923300 | 0.10397800  | 1.60536500  |

|    |             |             |             |
|----|-------------|-------------|-------------|
| C  | -1.53330400 | -1.27127700 | 1.01970000  |
| H  | -1.98946000 | 0.03632100  | 2.69481100  |
| H  | -2.19590900 | -1.58005900 | 0.22265900  |
| H  | -1.57190000 | -2.04882000 | 1.78154800  |
| S  | -3.79932700 | 0.40235500  | -0.40736300 |
| O  | -2.69580100 | 0.21402800  | -1.37218400 |
| O  | -4.80816100 | 1.43358700  | -0.67250700 |
| C  | -4.60864400 | -1.17939100 | -0.20094900 |
| C  | -4.41445300 | -2.15792100 | -1.17640600 |
| C  | -5.47554700 | -1.38916200 | 0.87355500  |
| C  | -5.09285300 | -3.36996600 | -1.06160300 |
| H  | -3.73099800 | -1.96757900 | -1.99627600 |
| C  | -6.14040300 | -2.60774000 | 0.97252300  |
| H  | -5.60820700 | -0.61476600 | 1.62059400  |
| C  | -5.96079400 | -3.61531300 | 0.01102600  |
| H  | -4.94630700 | -4.13707100 | -1.81714000 |
| H  | -6.81228600 | -2.78169100 | 1.80866200  |
| C  | -6.66511900 | -4.94249000 | 0.15042500  |
| H  | -6.76390500 | -5.44848100 | -0.81381300 |
| H  | -6.10554600 | -5.61017200 | 0.81700100  |
| H  | -7.66518200 | -4.82104300 | 0.57710200  |
| C  | -2.20505700 | 6.61663100  | -2.37824700 |
| H  | -2.95937300 | 5.82222100  | -2.30260900 |
| H  | -2.68398600 | 7.58387200  | -2.21863400 |
| H  | -1.76192500 | 6.59527800  | -3.38257700 |
| In | 3.38716100  | -1.60810000 | -0.72237700 |
| Cl | 3.66655300  | -0.59105200 | -2.84613700 |
| Cl | 3.67926900  | -3.93752900 | -0.74805500 |
| Cl | 4.94034900  | -0.42573600 | 0.61931200  |
| C  | 1.16133800  | 3.07582100  | -1.03825200 |
| C  | 1.95355500  | 1.80736700  | -0.83157800 |
| H  | 1.98254700  | 1.21705000  | -1.74883600 |
| H  | 2.99381000  | 2.01189200  | -0.56705700 |

B-int3-R

0 1

|   |             |             |             |
|---|-------------|-------------|-------------|
| C | -1.84270600 | 0.47280500  | -0.74508000 |
| C | -0.71359700 | -0.07458300 | -1.38266900 |
| O | 0.31095100  | 0.52091300  | -1.79760900 |
| C | -1.78961100 | 1.84823000  | -0.28695000 |
| O | -1.06316500 | 2.75973800  | -0.65793100 |
| O | -0.80743500 | -1.45279600 | -1.54174400 |
| O | -2.72254500 | 2.06821900  | 0.72366900  |
| C | 0.22950200  | -2.10959800 | -2.27513300 |

|   |             |             |             |
|---|-------------|-------------|-------------|
| H | 0.97568300  | -2.50839200 | -1.58549900 |
| H | -0.24564600 | -2.92587500 | -2.82552500 |
| H | 0.72660900  | -1.41924300 | -2.95593200 |
| C | -2.66890900 | 3.35155400  | 1.33551900  |
| H | -3.58257800 | 3.43948300  | 1.92901100  |
| H | -1.79116800 | 3.43053000  | 1.97985100  |
| H | -2.62783500 | 4.15175300  | 0.59497000  |
| C | -2.46429800 | -4.01376900 | 0.71628100  |
| C | -2.92203500 | -3.80500900 | -0.58941400 |
| C | -2.28679800 | -4.44563600 | -1.64512800 |
| C | -1.19255400 | -5.27069400 | -1.36530700 |
| C | -0.73516800 | -5.44559900 | -0.05296000 |
| C | -1.36982100 | -4.81548300 | 1.02068300  |
| C | -4.22795600 | -2.63216900 | 0.90673600  |
| C | -4.06511900 | -2.82831500 | -0.54938500 |
| H | -2.61853000 | -4.29483800 | -2.66760100 |
| H | -0.67842400 | -5.77188300 | -2.17902200 |
| H | 0.12658100  | -6.07647100 | 0.13705000  |
| H | -1.00905000 | -4.94852300 | 2.03406900  |
| H | -4.94180900 | -1.96355700 | 1.37260400  |
| N | -3.31235100 | -3.27641100 | 1.59430500  |
| C | -3.09073200 | -0.79778600 | 4.12783800  |
| C | -1.26730400 | -1.26959500 | 2.61960100  |
| C | -2.58696300 | 0.48648100  | 4.34711900  |
| H | -4.00639700 | -1.09758000 | 4.63225300  |
| C | -0.77396900 | 0.01297200  | 2.79661200  |
| H | -0.75378600 | -1.91988100 | 1.91844300  |
| C | -1.42628100 | 0.89095800  | 3.68059400  |
| H | -3.11144700 | 1.15542400  | 5.01774500  |
| H | 0.08771600  | 0.36119000  | 2.23640200  |
| O | -0.85185700 | 2.11471700  | 3.82726500  |
| C | -5.34454100 | -3.18136400 | -1.35620000 |
| H | -5.33838700 | -4.22523500 | -1.67876500 |
| H | -6.23440500 | -3.01919000 | -0.74235900 |
| C | -5.35244000 | -2.17697100 | -2.53206000 |
| H | -4.68009500 | -2.50398300 | -3.33291100 |
| H | -6.34099000 | -2.00255000 | -2.95358500 |
| N | -4.79025600 | -0.94175300 | -1.96477400 |
| C | -3.61059500 | -1.37708800 | -1.21839200 |
| C | -2.90408000 | -0.45497000 | -0.20867100 |
| H | -2.88681000 | -1.68107600 | -1.97379200 |
| H | -2.42412000 | -1.13776900 | 0.49835100  |
| H | -3.63084200 | 0.10598800  | 0.37334600  |
| S | -5.96800500 | 0.04483400  | -1.19243800 |

|    |             |             |             |
|----|-------------|-------------|-------------|
| O  | -6.05495300 | -0.27388600 | 0.25013400  |
| O  | -7.18931900 | -0.09038000 | -1.99711800 |
| C  | -5.25706800 | 1.66190300  | -1.39098900 |
| C  | -4.33724700 | 1.92457700  | -2.40913900 |
| C  | -5.68749800 | 2.66447800  | -0.52117100 |
| C  | -3.81499800 | 3.20767600  | -2.52319900 |
| H  | -4.00419700 | 1.13041800  | -3.06373500 |
| C  | -5.17651800 | 3.94992700  | -0.67691100 |
| H  | -6.38848600 | 2.43604400  | 0.27441200  |
| C  | -4.21646500 | 4.23349400  | -1.65814000 |
| H  | -3.05144900 | 3.40465100  | -3.26902200 |
| H  | -5.49532800 | 4.73568900  | 0.00199700  |
| C  | -3.55591100 | 5.58516300  | -1.74683100 |
| H  | -3.57894300 | 5.97583100  | -2.76962400 |
| H  | -4.03165300 | 6.31757800  | -1.08892200 |
| H  | -2.50216500 | 5.49282600  | -1.45757500 |
| C  | -1.43719300 | 3.04674600  | 4.72575400  |
| H  | -1.45670400 | 2.65767100  | 5.75177300  |
| H  | -0.80386500 | 3.93362600  | 4.68482800  |
| H  | -2.45493500 | 3.31569300  | 4.41712600  |
| Rh | 4.33170800  | 0.24941200  | 0.53681200  |
| O  | 3.52495900  | -1.33619500 | 1.65020500  |
| O  | 4.99702100  | -1.09225100 | -0.90940900 |
| O  | 1.54471900  | -1.25346100 | 0.54201500  |
| O  | 3.01186400  | -1.01209400 | -2.00536900 |
| C  | 2.36315700  | -1.76085600 | 1.37889900  |
| C  | 1.87780600  | -3.00626900 | 2.11291000  |
| C  | 2.93312800  | -4.11427600 | 2.26702700  |
| H  | 3.83496200  | -3.67384400 | 2.70589800  |
| H  | 2.55383700  | -4.84968100 | 2.98819100  |
| C  | 5.42458200  | -3.68155500 | -2.16482800 |
| H  | 5.88882100  | -4.26994200 | -2.96569900 |
| H  | 6.23866500  | -3.28017200 | -1.55105300 |
| C  | 4.68147600  | -2.49976000 | -2.81361900 |
| C  | 4.19543500  | -1.44526200 | -1.82862100 |
| Rh | 2.20545500  | 0.33543100  | -0.64080800 |
| O  | 2.99623300  | 1.87008700  | -1.76243300 |
| O  | 1.56128500  | 1.63833700  | 0.84325000  |
| O  | 4.96059000  | 1.83302900  | -0.62638800 |
| O  | 3.58706400  | 1.64020600  | 1.86589600  |
| C  | 4.15288700  | 2.31642700  | -1.48525000 |
| C  | 4.61649500  | 3.54469200  | -2.25429500 |
| C  | 3.51016100  | 4.58143000  | -2.52535700 |
| H  | 2.65997300  | 4.06441200  | -2.98310500 |

|   |             |             |             |
|---|-------------|-------------|-------------|
| H | 3.89132800  | 5.29523500  | -3.26630800 |
| C | 1.03497500  | 4.23271800  | 1.92742700  |
| H | 0.53684800  | 4.81981500  | 2.71099900  |
| H | 0.25914200  | 3.70127300  | 1.36929800  |
| C | 1.94200000  | 3.19387400  | 2.61196900  |
| C | 2.40067300  | 2.07021700  | 1.69850400  |
| H | 5.45562400  | 3.98374100  | -1.70589900 |
| H | 5.01344900  | 3.17895000  | -3.21032200 |
| H | 5.35794700  | -1.98937400 | -3.51066400 |
| H | 3.81784400  | -2.84196300 | -3.39169200 |
| H | 1.54059800  | -2.67552700 | 3.10355900  |
| H | 1.00013500  | -3.38064100 | 1.57726800  |
| H | 2.83512200  | 3.65441600  | 3.04551500  |
| H | 1.38659900  | 2.71483400  | 3.42547600  |
| C | 3.02537300  | 5.35616500  | -1.28538200 |
| H | 3.86276000  | 5.92663000  | -0.85649100 |
| H | 2.28387500  | 6.09824200  | -1.61278300 |
| C | 2.40528300  | 4.45585400  | -0.21270800 |
| H | 1.66166900  | 3.79578100  | -0.66999500 |
| H | 3.19309200  | 3.80617800  | 0.18205900  |
| C | 1.76069400  | 5.19038400  | 0.96591100  |
| H | 1.02996100  | 5.91826200  | 0.58630600  |
| H | 2.52054500  | 5.76917300  | 1.51254000  |
| C | 4.55261300  | -4.61357700 | -1.30184900 |
| H | 3.75499600  | -5.05238500 | -1.91968800 |
| H | 5.17742700  | -5.45314400 | -0.96685700 |
| C | 3.94494800  | -3.91349200 | -0.08119000 |
| H | 4.71659500  | -3.31169400 | 0.40811200  |
| H | 3.19038500  | -3.20146200 | -0.42804700 |
| C | 3.30375200  | -4.83822400 | 0.95867500  |
| H | 3.99800500  | -5.65470700 | 1.20013400  |
| H | 2.40721000  | -5.31404800 | 0.53260000  |
| C | -2.43701300 | -1.69083900 | 3.28120400  |
| C | -3.02968500 | -3.05897200 | 3.03675900  |
| H | -2.36946700 | -3.87159900 | 3.34688400  |
| H | -3.97298700 | -3.17881300 | 3.57486900  |

B-int4-R

0 1

|   |             |             |             |
|---|-------------|-------------|-------------|
| C | -1.54964100 | -0.11606800 | -2.28400100 |
| C | -0.49290200 | 0.73633300  | -1.57494500 |
| O | 0.06993000  | 0.32943700  | -0.56409400 |
| C | -0.77310900 | -1.11493200 | -3.15794900 |
| O | 0.40944100  | -1.35090600 | -3.06560100 |

|   |             |             |             |
|---|-------------|-------------|-------------|
| O | -0.28753500 | 1.90028600  | -2.15669400 |
| O | -1.59646700 | -1.73587200 | -4.02708400 |
| C | 0.50306000  | 2.89042800  | -1.45532300 |
| H | 1.55735500  | 2.71974500  | -1.66566200 |
| H | 0.15596600  | 3.84777300  | -1.84203700 |
| H | 0.32776500  | 2.81007500  | -0.38284900 |
| C | -1.02323000 | -2.86027300 | -4.71178900 |
| H | -1.82058300 | -3.25956600 | -5.33797100 |
| H | -0.16700000 | -2.55053800 | -5.31621200 |
| H | -0.69766800 | -3.60932600 | -3.98520700 |
| C | -3.11021600 | -3.04192200 | -1.75875800 |
| C | -4.16446900 | -2.15358800 | -2.04473100 |
| C | -5.31471300 | -2.60315700 | -2.67569000 |
| C | -5.42656200 | -3.95912300 | -3.01736200 |
| C | -4.38897200 | -4.84203400 | -2.70534800 |
| C | -3.22009300 | -4.39841100 | -2.07589100 |
| C | -2.31789400 | -0.94068800 | -1.18012500 |
| C | -3.83463600 | -0.79653200 | -1.45819400 |
| H | -6.12767800 | -1.91392700 | -2.89304800 |
| H | -6.31971900 | -4.32324500 | -3.51555000 |
| H | -4.48331800 | -5.89332000 | -2.96365400 |
| H | -2.41226500 | -5.08978700 | -1.85606300 |
| H | -2.05240600 | -0.52102800 | -0.21660200 |
| N | -2.01278200 | -2.37275000 | -1.21233100 |
| C | -3.02183500 | -3.36571500 | 1.64125200  |
| C | -1.52354300 | -1.51930800 | 2.01458400  |
| C | -3.75781300 | -3.01717500 | 2.77628800  |
| H | -3.34177600 | -4.21699100 | 1.04598800  |
| C | -2.24904000 | -1.15699300 | 3.14532400  |
| H | -0.65216600 | -0.93721400 | 1.72996200  |
| C | -3.37361500 | -1.89993900 | 3.53038200  |
| H | -4.61747600 | -3.61404400 | 3.05665800  |
| H | -1.95951900 | -0.30158900 | 3.74710300  |
| O | -4.02336900 | -1.45731600 | 4.64949200  |
| C | -4.68744800 | -0.46987500 | -0.19366800 |
| H | -5.35728900 | -1.29030500 | 0.07118300  |
| H | -4.03629400 | -0.27666500 | 0.66205500  |
| C | -5.44553600 | 0.80429800  | -0.58534800 |
| H | -6.34936200 | 0.56330200  | -1.15789700 |
| H | -5.75094000 | 1.42662400  | 0.25572400  |
| N | -4.55923900 | 1.54530500  | -1.52106200 |
| C | -3.98895000 | 0.44752000  | -2.38180700 |
| C | -2.63458000 | 0.66923300  | -3.08136000 |
| H | -4.77227500 | 0.27657300  | -3.12715200 |

|    |             |             |             |
|----|-------------|-------------|-------------|
| H  | -2.37889900 | 1.71984200  | -3.19398700 |
| H  | -2.71351700 | 0.24349200  | -4.08055800 |
| S  | -3.44672800 | 2.60962700  | -0.77433600 |
| O  | -2.92529800 | 3.49046600  | -1.82672300 |
| O  | -2.49051600 | 1.88564900  | 0.09014500  |
| C  | -4.51524700 | 3.57702700  | 0.28403600  |
| C  | -4.43439600 | 3.42047500  | 1.66695600  |
| C  | -5.37288300 | 4.51469700  | -0.29618000 |
| C  | -5.24117800 | 4.21585000  | 2.48083000  |
| H  | -3.74594300 | 2.69466200  | 2.08660900  |
| C  | -6.17151500 | 5.29559300  | 0.53282600  |
| H  | -5.39833500 | 4.63066100  | -1.37423500 |
| C  | -6.12007800 | 5.15785100  | 1.93001500  |
| H  | -5.18234800 | 4.10522300  | 3.56004500  |
| H  | -6.84021700 | 6.03087400  | 0.09312400  |
| C  | -7.00796200 | 6.00295100  | 2.81053600  |
| H  | -6.67971800 | 5.98196100  | 3.85306600  |
| H  | -7.02011100 | 7.04566900  | 2.47739900  |
| H  | -8.04314000 | 5.64188500  | 2.78027400  |
| C  | -5.17280100 | -2.16707000 | 5.07988300  |
| H  | -4.93691300 | -3.20823100 | 5.33848000  |
| H  | -5.53191500 | -1.65063400 | 5.97192700  |
| H  | -5.96413500 | -2.16164000 | 4.31759800  |
| Rh | 4.57120600  | -0.16916600 | 0.75759100  |
| O  | 5.06418700  | 0.54558100  | -1.13130200 |
| O  | 4.52333800  | 1.76720900  | 1.52474400  |
| O  | 2.88098300  | 0.82427700  | -1.67019900 |
| O  | 2.36045600  | 2.03877000  | 0.90068500  |
| C  | 4.13040300  | 0.91304300  | -1.90888700 |
| C  | 4.52002000  | 1.52541700  | -3.24366000 |
| C  | 5.64945900  | 2.56919400  | -3.15846000 |
| H  | 6.50773900  | 2.10800700  | -2.65672800 |
| H  | 5.96642500  | 2.80301900  | -4.18190300 |
| C  | 4.74171200  | 4.68260300  | 1.39466200  |
| H  | 4.75159100  | 5.63928800  | 1.93064400  |
| H  | 5.63230100  | 4.12943600  | 1.71350000  |
| C  | 3.49643800  | 3.89997800  | 1.85309200  |
| C  | 3.46166700  | 2.45134100  | 1.39353400  |
| Rh | 2.25022600  | 0.11148000  | 0.15854500  |
| O  | 1.76888700  | -0.59731200 | 2.06719700  |
| O  | 2.28783700  | -1.84198200 | -0.54551500 |
| O  | 3.95813100  | -0.90902000 | 2.57317900  |
| O  | 4.47773600  | -2.07662000 | -0.00406400 |
| C  | 2.71283000  | -0.99027300 | 2.82724300  |

|   |             |             |             |
|---|-------------|-------------|-------------|
| C | 2.34328100  | -1.60936200 | 4.16614100  |
| C | 1.22405900  | -2.66624300 | 4.11896200  |
| H | 0.33719800  | -2.21688300 | 3.66546000  |
| H | 0.95596800  | -2.90830400 | 5.15474200  |
| C | 2.07576300  | -4.73636600 | -0.47659200 |
| H | 2.07352000  | -5.69254800 | -1.01423200 |
| H | 1.20183800  | -4.17691300 | -0.82293200 |
| C | 3.33449000  | -3.95996000 | -0.90180500 |
| C | 3.36487200  | -2.50959300 | -0.44874200 |
| H | 3.25978800  | -2.02004200 | 4.59918800  |
| H | 2.02008000  | -0.78104300 | 4.80987300  |
| H | 3.46893100  | 3.88009100  | 2.94987500  |
| H | 2.57607300  | 4.38316500  | 1.51222900  |
| H | 4.84363300  | 0.69520300  | -3.88388400 |
| H | 3.61793100  | 1.94952400  | -3.69419900 |
| H | 4.24579900  | -4.44168300 | -0.53580200 |
| H | 3.39065500  | -3.94084900 | -1.99754500 |
| C | 1.56368500  | -3.97004800 | 3.37379800  |
| H | 2.39452700  | -4.48563100 | 3.87630200  |
| H | 0.69337400  | -4.63615300 | 3.45180900  |
| C | 1.90220000  | -3.74864300 | 1.89507500  |
| H | 1.17460000  | -3.05405700 | 1.46926700  |
| H | 2.87198100  | -3.24627700 | 1.83207500  |
| C | 1.95055400  | -5.01601400 | 1.03414700  |
| H | 1.03399900  | -5.59986600 | 1.19899700  |
| H | 2.78320900  | -5.65614600 | 1.35938400  |
| C | 4.82642800  | 4.95429800  | -0.11920500 |
| H | 3.95332200  | 5.54076900  | -0.44042100 |
| H | 5.70520300  | 5.58688100  | -0.30461600 |
| C | 4.93691000  | 3.67444700  | -0.95550200 |
| H | 5.68666100  | 3.01747900  | -0.50279100 |
| H | 3.98830900  | 3.13439100  | -0.88905100 |
| C | 5.28118500  | 3.87822000  | -2.43546700 |
| H | 6.13390300  | 4.56588200  | -2.51887200 |
| H | 4.44257700  | 4.36571000  | -2.95354300 |
| C | -1.90386100 | -2.62798900 | 1.24044000  |
| C | -1.22916800 | -2.90747500 | -0.08697500 |
| H | -0.24029700 | -2.44516000 | -0.13040300 |
| H | -1.10039700 | -3.98100400 | -0.24874600 |

B-TS3-I

0 1

|   |            |            |            |
|---|------------|------------|------------|
| C | 1.61630000 | 0.14648200 | 0.56799200 |
| C | 1.24190300 | 0.85917800 | 1.73998500 |



|   |             |             |             |
|---|-------------|-------------|-------------|
| O | 1.43804700  | 2.07775500  | 1.98184400  |
| C | 2.26085900  | 0.89044300  | -0.44588300 |
| O | 2.59979600  | 2.11376000  | -0.37560300 |
| O | 0.56251500  | 0.12965500  | 2.65915500  |
| O | 2.48294200  | 0.24885300  | -1.61011000 |
| C | -0.03970800 | 0.88809800  | 3.72697000  |
| H | -0.73814200 | 1.62047000  | 3.31609500  |
| H | -0.56870100 | 0.15303700  | 4.33215400  |
| H | 0.72313300  | 1.40540100  | 4.31186400  |
| C | 2.92840600  | 1.07368100  | -2.70659400 |
| H | 2.90015500  | 0.42099200  | -3.57928400 |
| H | 2.27438600  | 1.93938700  | -2.83219800 |
| H | 3.94825600  | 1.42438300  | -2.53121700 |
| C | -2.55022000 | -1.42072300 | 1.06000000  |
| C | -1.88987900 | -2.37780900 | 1.85428600  |
| C | -2.03522700 | -2.34805400 | 3.24138800  |
| C | -2.83569400 | -1.35135300 | 3.80003700  |
| C | -3.45043900 | -0.37942100 | 2.99362800  |
| C | -3.31628500 | -0.39232400 | 1.60605800  |
| C | -1.45197300 | -2.77691200 | -0.35383400 |
| C | -1.05863800 | -3.19626800 | 0.95727900  |
| H | -1.54076300 | -3.08314400 | 3.86971800  |
| H | -2.97571400 | -1.31641600 | 4.87614500  |
| H | -4.04286400 | 0.40267200  | 3.45690300  |
| H | -3.78253000 | 0.36298300  | 0.98915900  |
| H | -1.06432000 | -3.14789500 | -1.29277500 |
| N | -2.25486900 | -1.71714600 | -0.29715300 |
| C | -5.01333400 | -1.41613200 | -1.64520600 |
| C | -4.37304900 | 0.90742300  | -1.55139700 |
| C | -6.35869500 | -1.05603400 | -1.73290600 |
| H | -4.74796700 | -2.47088300 | -1.64101100 |
| C | -5.70738400 | 1.28048600  | -1.64376100 |
| H | -3.60298200 | 1.66981000  | -1.46085600 |
| C | -6.70988600 | 0.30204500  | -1.73358700 |
| H | -7.11420000 | -1.82920500 | -1.80100900 |
| H | -6.00145300 | 2.32450000  | -1.64278900 |
| O | -7.98418000 | 0.77112100  | -1.81306200 |
| C | -0.52658500 | -4.57950400 | 1.27228800  |
| H | -1.15150700 | -5.07835700 | 2.01830300  |
| H | -0.52904200 | -5.19639100 | 0.36980100  |
| C | 0.93808400  | -4.44365900 | 1.78126000  |
| H | 0.96195400  | -4.11638300 | 2.82509400  |
| H | 1.51330800  | -5.36270000 | 1.68724700  |
| N | 1.54332600  | -3.36757400 | 0.97656400  |

|    |             |             |             |
|----|-------------|-------------|-------------|
| C  | 0.71882600  | -2.24544200 | 1.05123200  |
| C  | 0.78149500  | -1.04884400 | 0.13769300  |
| H  | 0.56451700  | -1.96342000 | 2.08795500  |
| H  | -0.23952900 | -0.66067600 | 0.10669000  |
| H  | 1.04460900  | -1.34231300 | -0.87567900 |
| S  | 2.18078200  | -3.91279600 | -0.56020700 |
| O  | 1.14912400  | -3.76865800 | -1.60216200 |
| O  | 2.71989700  | -5.24440200 | -0.27559500 |
| C  | 3.47773200  | -2.73916800 | -0.86881600 |
| C  | 3.81865700  | -2.51586900 | -2.20422900 |
| C  | 4.16782100  | -2.12205500 | 0.17650600  |
| C  | 4.87459300  | -1.65602300 | -2.48943000 |
| H  | 3.25621100  | -2.99135100 | -3.00017600 |
| C  | 5.19957400  | -1.24340400 | -0.13543300 |
| H  | 3.88416800  | -2.30087400 | 1.20623300  |
| C  | 5.56648100  | -0.99408200 | -1.46611200 |
| H  | 5.14776000  | -1.47458600 | -3.52473000 |
| H  | 5.72108100  | -0.73180800 | 0.66824200  |
| C  | 6.65801100  | -0.00151500 | -1.77701000 |
| H  | 7.54309000  | -0.17637100 | -1.15692700 |
| H  | 6.96012300  | -0.04640900 | -2.82640500 |
| H  | 6.31533600  | 1.01906300  | -1.56910000 |
| C  | -9.04779600 | -0.16614900 | -1.90556300 |
| H  | -9.08842700 | -0.82060200 | -1.02479700 |
| H  | -9.96410800 | 0.42346400  | -1.95676600 |
| H  | -8.96547300 | -0.78406300 | -2.80935900 |
| In | 1.08288600  | 3.46006700  | 0.29387500  |
| Cl | 1.25078400  | 5.25203600  | 1.80008500  |
| Cl | -1.06723300 | 2.25531900  | 0.04136400  |
| Cl | 1.16339400  | 4.46435000  | -1.88018600 |
| C  | -4.01106000 | -0.44899000 | -1.55106900 |
| C  | -2.55707700 | -0.83476500 | -1.45053800 |
| H  | -2.21808300 | -1.38031500 | -2.33674900 |
| H  | -1.93344800 | 0.05883900  | -1.34082500 |

B-TS3-n

O 1

|   |             |             |            |
|---|-------------|-------------|------------|
| C | -2.24671200 | 0.34572300  | 1.39884800 |
| C | -2.85648800 | 1.60219700  | 1.69573900 |
| O | -3.98314400 | 1.85790500  | 2.10247000 |
| C | -2.83857700 | -0.84533900 | 1.92740600 |
| O | -3.86653000 | -0.97540600 | 2.58605200 |
| O | -1.96891100 | 2.68304000  | 1.43998400 |
| O | -2.06179700 | -1.98376900 | 1.64297500 |

|   |             |             |             |
|---|-------------|-------------|-------------|
| C | -2.53468800 | 3.96816300  | 1.67069600  |
| H | -2.83559600 | 4.09097400  | 2.71584200  |
| H | -1.75365300 | 4.69170600  | 1.41983900  |
| H | -3.42055400 | 4.13939300  | 1.04878100  |
| C | -2.55940000 | -3.18513500 | 2.21447300  |
| H | -1.84073100 | -3.96573100 | 1.94994600  |
| H | -2.64662800 | -3.10623300 | 3.30331200  |
| H | -3.54657000 | -3.44121000 | 1.81696300  |
| C | 2.42957700  | 1.27615200  | 0.29185300  |
| C | 1.63057900  | 2.11720800  | -0.50328900 |
| C | 1.63591200  | 3.49099000  | -0.26620100 |
| C | 2.44675100  | 3.98495100  | 0.75626500  |
| C | 3.23383600  | 3.12583200  | 1.53956400  |
| C | 3.23845300  | 1.74809800  | 1.32141500  |
| C | 1.35824100  | -0.05393200 | -1.16390400 |
| C | 0.84134900  | 1.25972600  | -1.41013000 |
| H | 1.01825400  | 4.15942400  | -0.85810500 |
| H | 2.46686300  | 5.05179400  | 0.95464000  |
| H | 3.85108900  | 3.53934900  | 2.33033500  |
| H | 3.85127300  | 1.08094000  | 1.91516100  |
| H | 1.02554900  | -0.97098700 | -1.63182200 |
| N | 2.21964700  | -0.05197000 | -0.15101300 |
| C | 4.96653400  | -1.13225200 | -0.70372600 |
| C | 4.98389300  | -1.57229500 | 1.66072300  |
| C | 6.35872100  | -1.20610500 | -0.74052400 |
| H | 4.42588900  | -0.92061500 | -1.62256700 |
| C | 6.36983400  | -1.65528700 | 1.64162100  |
| H | 4.45486600  | -1.71344400 | 2.59991500  |
| C | 7.06870700  | -1.47147500 | 0.43917700  |
| H | 6.87399900  | -1.05730900 | -1.68119200 |
| H | 6.93683100  | -1.85624200 | 2.54396100  |
| O | 8.42241000  | -1.56568100 | 0.52537000  |
| C | 0.36792700  | 1.68144500  | -2.79969000 |
| H | 0.91857400  | 2.55996800  | -3.14711400 |
| H | 0.55133600  | 0.87338900  | -3.51296700 |
| C | -1.16100200 | 1.94932200  | -2.73484100 |
| H | -1.36988300 | 2.95720000  | -2.36274600 |
| H | -1.65852200 | 1.81738000  | -3.69314100 |
| N | -1.68246700 | 1.00251100  | -1.73977800 |
| C | -0.89045000 | 1.13524900  | -0.58699000 |
| C | -0.94045600 | 0.24307200  | 0.63652900  |
| H | -0.90748500 | 2.17936900  | -0.28546300 |
| H | -0.07448300 | 0.55621500  | 1.24163000  |
| H | -0.78941500 | -0.79692600 | 0.35362400  |

|   |             |             |             |
|---|-------------|-------------|-------------|
| S | -2.12595100 | -0.55958300 | -2.38021000 |
| O | -1.04287700 | -1.52868600 | -2.11974200 |
| O | -2.49006000 | -0.28983200 | -3.77700800 |
| C | -3.53592800 | -0.97973300 | -1.39862100 |
| C | -3.79311200 | -2.33439700 | -1.18981800 |
| C | -4.33945900 | 0.01649800  | -0.83591100 |
| C | -4.88162200 | -2.68847800 | -0.39766700 |
| H | -3.13749500 | -3.08935100 | -1.60864800 |
| C | -5.39478300 | -0.36038900 | -0.01727900 |
| H | -4.10487600 | 1.06285500  | -0.97834400 |
| C | -5.66600900 | -1.71238500 | 0.23146800  |
| H | -5.08786200 | -3.73948700 | -0.21715700 |
| H | -5.94685700 | 0.40863400  | 0.51072600  |
| C | -6.69102900 | -2.09220100 | 1.26303400  |
| H | -7.56701500 | -1.43777400 | 1.22745800  |
| H | -7.02255700 | -3.12903600 | 1.15423400  |
| H | -6.22125800 | -1.97211800 | 2.24631000  |
| C | 9.19134600  | -1.39779700 | -0.65938100 |
| H | 9.05331500  | -0.39869900 | -1.09238000 |
| H | 10.23286300 | -1.51853300 | -0.35974600 |
| H | 8.94171600  | -2.15550700 | -1.41305200 |
| C | 4.26198200  | -1.31202300 | 0.48808300  |
| C | 2.75155500  | -1.24943100 | 0.51423700  |
| H | 2.30039900  | -2.10792700 | 0.00785400  |
| H | 2.37795100  | -1.24831800 | 1.54303800  |

B-TS3-R

|     |             |             |             |
|-----|-------------|-------------|-------------|
| O 1 |             |             |             |
| C   | -1.85658200 | 0.48911300  | -0.67113500 |
| C   | -0.75360700 | -0.08049100 | -1.33131100 |
| O   | 0.27900200  | 0.49055000  | -1.75959100 |
| C   | -1.77403700 | 1.85510100  | -0.19724600 |
| O   | -1.03545600 | 2.75839500  | -0.56707800 |
| O   | -0.88933000 | -1.45548500 | -1.49841300 |
| O   | -2.68611200 | 2.07730200  | 0.83185900  |
| C   | 0.13581200  | -2.14408600 | -2.22028900 |
| H   | 0.88247000  | -2.53110700 | -1.52475400 |
| H   | -0.35520900 | -2.97067200 | -2.73985500 |
| H   | 0.63505500  | -1.47851400 | -2.92418200 |
| C   | -2.57546600 | 3.33492400  | 1.48752500  |
| H   | -3.46535100 | 3.42400700  | 2.11615200  |
| H   | -1.67458600 | 3.36602100  | 2.10337500  |
| H   | -2.53690300 | 4.16282200  | 0.77775200  |
| C   | -2.63646100 | -3.93802900 | 0.70215800  |

|   |             |             |             |
|---|-------------|-------------|-------------|
| C | -3.17934500 | -3.84780100 | -0.59078000 |
| C | -2.56231900 | -4.52255800 | -1.64268600 |
| C | -1.40853200 | -5.26045300 | -1.37474500 |
| C | -0.86627200 | -5.31530400 | -0.08111000 |
| C | -1.47487600 | -4.65269800 | 0.98491800  |
| C | -4.47557700 | -2.66234400 | 0.87690100  |
| C | -4.33525100 | -2.93034300 | -0.52747100 |
| H | -2.96413500 | -4.46895100 | -2.65002900 |
| H | -0.91209200 | -5.79079200 | -2.18108600 |
| H | 0.04290600  | -5.88018500 | 0.09586200  |
| H | -1.04801700 | -4.69213700 | 1.98052600  |
| H | -5.21264800 | -2.01796300 | 1.33911800  |
| N | -3.47657800 | -3.20144900 | 1.57105800  |
| C | -3.10490000 | -0.70174500 | 4.11190900  |
| C | -1.30643400 | -1.26047100 | 2.60688300  |
| C | -2.51705800 | 0.53940900  | 4.36835300  |
| H | -4.04240100 | -0.95107300 | 4.60365500  |
| C | -0.72969900 | -0.01818200 | 2.81810600  |
| H | -0.82871500 | -1.92722300 | 1.89612000  |
| C | -1.32572200 | 0.87899400  | 3.72143800  |
| H | -3.00050900 | 1.22546700  | 5.05259600  |
| H | 0.15747900  | 0.28415300  | 2.27157200  |
| O | -0.66881900 | 2.05750900  | 3.90425600  |
| C | -5.53901300 | -3.04224400 | -1.45486500 |
| H | -5.63210500 | -4.05625100 | -1.85378600 |
| H | -6.45600100 | -2.81429600 | -0.90473500 |
| C | -5.36488100 | -1.99354200 | -2.58440800 |
| H | -4.64413400 | -2.33538400 | -3.33415600 |
| H | -6.29750400 | -1.73544400 | -3.08241500 |
| N | -4.78377600 | -0.81835400 | -1.92107800 |
| C | -3.65869300 | -1.23966500 | -1.19370900 |
| C | -2.93869600 | -0.42745800 | -0.13365000 |
| H | -2.94934700 | -1.70828000 | -1.87003400 |
| H | -2.46736700 | -1.17033000 | 0.50962000  |
| H | -3.63814400 | 0.12591900  | 0.48687500  |
| S | -5.95606100 | 0.25127200  | -1.20457300 |
| O | -6.10434200 | -0.05809000 | 0.22944900  |
| O | -7.13661100 | 0.14480500  | -2.06879100 |
| C | -5.14739800 | 1.81816500  | -1.40309900 |
| C | -4.22116100 | 2.02038300  | -2.43038500 |
| C | -5.49598700 | 2.84171900  | -0.52180500 |
| C | -3.60265100 | 3.25949100  | -2.53597700 |
| H | -3.95121500 | 1.21181400  | -3.09667000 |
| C | -4.88850500 | 4.08531200  | -0.67057700 |

|    |             |             |             |
|----|-------------|-------------|-------------|
| H  | -6.20240300 | 2.65831500  | 0.28038200  |
| C  | -3.91032300 | 4.30113600  | -1.65098700 |
| H  | -2.83010800 | 3.40394400  | -3.28430600 |
| H  | -5.13875900 | 4.88493300  | 0.02044900  |
| C  | -3.11961000 | 5.58120100  | -1.70586700 |
| H  | -3.03680300 | 5.96046900  | -2.72948000 |
| H  | -3.55919300 | 6.36368500  | -1.08126400 |
| H  | -2.10277400 | 5.37833500  | -1.34784800 |
| C  | -1.18616900 | 2.99475400  | 4.83743800  |
| H  | -1.23463100 | 2.57024700  | 5.84838100  |
| H  | -0.49108500 | 3.83530600  | 4.82849000  |
| H  | -2.18207800 | 3.34793300  | 4.54213400  |
| Rh | 4.34123100  | 0.17497500  | 0.49420300  |
| O  | 3.52766400  | -1.37901600 | 1.64383800  |
| O  | 4.95153700  | -1.19902500 | -0.94592800 |
| O  | 1.53136400  | -1.27921600 | 0.56660200  |
| O  | 2.94863900  | -1.09356400 | -2.00691300 |
| C  | 2.35479200  | -1.78830900 | 1.39799400  |
| C  | 1.86093100  | -3.01385600 | 2.15802400  |
| C  | 2.90414000  | -4.13179500 | 2.32197300  |
| H  | 3.81698200  | -3.69362100 | 2.73976400  |
| H  | 2.52546900  | -4.84760900 | 3.06265000  |
| C  | 5.31455300  | -3.81169800 | -2.16527300 |
| H  | 5.75386200  | -4.41932900 | -2.96583800 |
| H  | 6.14670600  | -3.40815900 | -1.57774300 |
| C  | 4.56924100  | -2.63340800 | -2.81795800 |
| C  | 4.12516200  | -1.55069700 | -1.84349700 |
| Rh | 2.19465500  | 0.28520500  | -0.64318100 |
| O  | 2.98999600  | 1.79558300  | -1.79643800 |
| O  | 1.60421300  | 1.61630000  | 0.83766800  |
| O  | 4.97518100  | 1.73517200  | -0.69866300 |
| O  | 3.64909800  | 1.59311300  | 1.82126400  |
| C  | 4.15874500  | 2.22523500  | -1.54516000 |
| C  | 4.62693400  | 3.44035600  | -2.33254300 |
| C  | 3.53061500  | 4.48915900  | -2.59786000 |
| H  | 2.66572900  | 3.97829300  | -3.03450500 |
| H  | 3.90866300  | 5.18836400  | -3.35420600 |
| C  | 1.13745400  | 4.22781300  | 1.90579800  |
| H  | 0.66444400  | 4.82940900  | 2.69398800  |
| H  | 0.34286500  | 3.70070300  | 1.37030800  |
| C  | 2.04846600  | 3.18559100  | 2.57986100  |
| C  | 2.46747200  | 2.04287600  | 1.67099400  |
| H  | 5.47969900  | 3.87337400  | -1.80061900 |
| H  | 5.00548600  | 3.06047800  | -3.29052300 |

|   |             |             |             |
|---|-------------|-------------|-------------|
| H | 5.23222700  | -2.14741800 | -3.54486500 |
| H | 3.68507500  | -2.97537200 | -3.36434200 |
| H | 1.53470000  | -2.66120400 | 3.14473000  |
| H | 0.97442200  | -3.38456000 | 1.63552200  |
| H | 2.95925500  | 3.63968700  | 2.98246100  |
| H | 1.51087100  | 2.72278800  | 3.41406400  |
| C | 3.07772900  | 5.28642900  | -1.35993500 |
| H | 3.92976900  | 5.85223000  | -0.95429700 |
| H | 2.33966200  | 6.03347200  | -1.68408100 |
| C | 2.46673600  | 4.40853200  | -0.26386900 |
| H | 1.70651800  | 3.75157000  | -0.69784900 |
| H | 3.25380700  | 3.75405200  | 0.12444200  |
| C | 1.85360400  | 5.16553900  | 0.91733200  |
| H | 1.12326000  | 5.89660900  | 0.54272500  |
| H | 2.63037700  | 5.74310300  | 1.44097100  |
| C | 4.45308400  | -4.71898000 | -1.26598500 |
| H | 3.63946200  | -5.16336000 | -1.85841800 |
| H | 5.07797600  | -5.55692500 | -0.92716800 |
| C | 3.87619700  | -3.98955000 | -0.04776200 |
| H | 4.66255000  | -3.38445100 | 0.41314300  |
| H | 3.12052100  | -3.27852600 | -0.39473700 |
| C | 3.24868900  | -4.88683000 | 1.02389300  |
| H | 3.94273200  | -5.70155000 | 1.27175000  |
| H | 2.34280500  | -5.36841900 | 0.62466300  |
| C | -2.50903300 | -1.61715300 | 3.24646200  |
| C | -3.18210300 | -2.94815200 | 2.99876400  |
| H | -2.57518000 | -3.79239700 | 3.33669600  |
| H | -4.13198400 | -3.00079900 | 3.53651600  |

B-TS4-I

0 1

|   |             |             |             |
|---|-------------|-------------|-------------|
| C | -0.87338000 | -1.23633900 | 0.41422000  |
| C | -0.69300300 | -1.65637500 | -0.95563700 |
| O | 0.33788300  | -2.18119200 | -1.42684600 |
| C | 0.01826000  | -1.85388100 | 1.36931700  |
| O | 1.14187400  | -2.33606100 | 1.12353300  |
| O | -1.71340000 | -1.38805100 | -1.77512300 |
| O | -0.42584000 | -1.83221900 | 2.63048800  |
| C | -1.50580700 | -1.70266200 | -3.17029000 |
| H | -1.39882300 | -2.78123800 | -3.30312200 |
| H | -2.39505900 | -1.33276500 | -3.67960400 |
| H | -0.60660400 | -1.20964700 | -3.54455100 |
| C | 0.49673600  | -2.32475500 | 3.62962100  |
| H | -0.01329300 | -2.18131200 | 4.58114200  |

|   |             |             |             |
|---|-------------|-------------|-------------|
| H | 0.71328000  | -3.38038800 | 3.45485700  |
| H | 1.42518900  | -1.75265900 | 3.59363600  |
| C | 1.64408500  | 0.81215400  | 1.80281800  |
| C | 0.43264500  | 1.11268000  | 2.44073400  |
| C | 0.39508500  | 1.25584400  | 3.82052800  |
| C | 1.58369300  | 1.09016400  | 4.54458800  |
| C | 2.78172500  | 0.78212400  | 3.89032700  |
| C | 2.83279900  | 0.63207800  | 2.49938300  |
| C | 0.09200500  | 0.77982600  | 0.16762800  |
| C | -0.63167700 | 1.32223000  | 1.37886100  |
| H | -0.53433600 | 1.49025200  | 4.33175300  |
| H | 1.57321900  | 1.19416000  | 5.62509000  |
| H | 3.68929500  | 0.64069000  | 4.46843300  |
| H | 3.74633000  | 0.34026700  | 1.99640800  |
| H | -0.27211600 | 0.94552000  | -0.83832300 |
| N | 1.40704400  | 0.70901700  | 0.40404700  |
| C | 1.95277300  | 3.00874000  | -1.81990200 |
| C | 3.72430600  | 2.98195600  | -0.19268300 |
| C | 2.13885900  | 4.37769900  | -2.02231600 |
| H | 1.18785400  | 2.49297700  | -2.39591000 |
| C | 3.92415800  | 4.34281200  | -0.38137000 |
| H | 4.34675200  | 2.44388600  | 0.51651400  |
| C | 3.13052400  | 5.05176000  | -1.29676800 |
| H | 1.52074200  | 4.89737900  | -2.74418100 |
| H | 4.69220600  | 4.88291900  | 0.16196400  |
| O | 3.40474000  | 6.38088300  | -1.40813800 |
| C | -0.94752700 | 2.85549900  | 1.22458800  |
| H | -0.22130800 | 3.46971100  | 1.75902800  |
| H | -0.93408400 | 3.14888400  | 0.17162700  |
| C | -2.37665600 | 2.96649900  | 1.77970100  |
| H | -2.37841000 | 2.94219100  | 2.87524800  |
| H | -2.91891000 | 3.85245400  | 1.45295400  |
| N | -3.05051200 | 1.72715300  | 1.31924300  |
| C | -2.03476900 | 0.66795500  | 1.61519800  |
| C | -2.19934100 | -0.70121200 | 0.90066600  |
| H | -2.13352300 | 0.50799600  | 2.69269700  |
| H | -2.85611200 | -0.61782700 | 0.04461700  |
| H | -2.66945300 | -1.40293700 | 1.59378800  |
| S | -3.59981400 | 1.90757000  | -0.30863700 |
| O | -2.54827300 | 1.53511500  | -1.27593700 |
| O | -4.19183400 | 3.24839700  | -0.37456900 |
| C | -4.90341100 | 0.69148600  | -0.40115700 |
| C | -4.92739300 | -0.18679900 | -1.48387800 |
| C | -5.91456600 | 0.68805400  | 0.56281300  |



|    |             |             |             |
|----|-------------|-------------|-------------|
| C  | -5.98010300 | -1.09436600 | -1.59067100 |
| H  | -4.12102300 | -0.16753000 | -2.20753600 |
| C  | -6.95409200 | -0.22760300 | 0.43937300  |
| H  | -5.87453300 | 1.38164100  | 1.39524600  |
| C  | -7.00359000 | -1.13181300 | -0.63474700 |
| H  | -6.00447600 | -1.78578700 | -2.42822400 |
| H  | -7.74285900 | -0.24297800 | 1.18662300  |
| C  | -8.12336500 | -2.13812400 | -0.73385500 |
| H  | -8.22100800 | -2.53352600 | -1.74834100 |
| H  | -7.94111200 | -2.98717700 | -0.06390700 |
| H  | -9.08208800 | -1.69692200 | -0.44444100 |
| C  | 2.65563400  | 7.14841300  | -2.34008100 |
| H  | 1.58554600  | 7.15367400  | -2.09370000 |
| H  | 3.04390500  | 8.16570800  | -2.27306800 |
| H  | 2.78577200  | 6.77888700  | -3.36559700 |
| In | 2.28752500  | -2.85064700 | -0.67328700 |
| Cl | 3.03558900  | -1.96924600 | -2.76831800 |
| Cl | 1.87246600  | -5.15036200 | -0.62742400 |
| Cl | 4.15345100  | -2.12951500 | 0.66322600  |
| C  | 2.73357400  | 2.29358800  | -0.90845000 |
| C  | 2.45109600  | 0.83558700  | -0.64200500 |
| H  | 2.08617500  | 0.32244200  | -1.53351400 |
| H  | 3.33298500  | 0.28927700  | -0.30521800 |

### C-int3-I

0 1

|   |             |             |             |
|---|-------------|-------------|-------------|
| C | 0.53988200  | -1.04119300 | -1.28089100 |
| C | 1.78348900  | -0.44520300 | -1.56767400 |
| O | 2.93265400  | -0.84862700 | -1.19850700 |
| C | 0.57466400  | -2.30531700 | -0.62672700 |
| O | 1.54440200  | -2.81068700 | -0.00202600 |
| O | 1.73884400  | 0.67208000  | -2.33439200 |
| O | -0.57140300 | -3.00229900 | -0.70224000 |
| C | 2.98313200  | 1.09924500  | -2.91957000 |
| H | 3.25650300  | 0.42698800  | -3.73887800 |
| H | 2.79909800  | 2.10431300  | -3.29586500 |
| H | 3.78147900  | 1.10932900  | -2.18083000 |
| C | -0.60283300 | -4.29386500 | -0.06656000 |
| H | 0.08432900  | -4.98163100 | -0.56503600 |
| H | -0.31204400 | -4.21370900 | 0.98409300  |
| H | -1.63636300 | -4.62326400 | -0.16962400 |
| C | -1.88821000 | 2.93423900  | 1.11043000  |
| C | -2.54128700 | 1.73196200  | 0.82710700  |
| C | -3.91790200 | 1.64796400  | 1.00124000  |

|   |             |             |             |
|---|-------------|-------------|-------------|
| C | -4.59983600 | 2.77986200  | 1.46423500  |
| C | -3.92198000 | 3.96836600  | 1.75751600  |
| C | -2.53739800 | 4.06755000  | 1.58370500  |
| C | -0.26041700 | 1.55205700  | 0.38634000  |
| C | -1.50285200 | 0.71995300  | 0.39013100  |
| H | -4.45801900 | 0.73820900  | 0.77880200  |
| H | -5.67571500 | 2.72748400  | 1.59729500  |
| H | -4.47361600 | 4.82832900  | 2.12309800  |
| H | -2.01035500 | 4.98618400  | 1.81388300  |
| H | 0.73963100  | 1.22242800  | 0.14199200  |
| N | -0.49725000 | 2.75866000  | 0.81773700  |
| C | 2.81377000  | 2.84618200  | 0.88898200  |
| C | 2.05529000  | 4.38544600  | -0.81042100 |
| C | 4.02864300  | 2.68997100  | 0.22607000  |
| H | 2.64626400  | 2.27834100  | 1.79857600  |
| C | 3.26929400  | 4.26206800  | -1.46721700 |
| H | 1.29126900  | 5.04362600  | -1.21802800 |
| C | 4.26135400  | 3.40274900  | -0.95958300 |
| H | 4.75286700  | 1.98697500  | 0.61812200  |
| H | 3.47651000  | 4.80546500  | -2.38299800 |
| O | 5.38718600  | 3.31078900  | -1.70299900 |
| C | -1.35612900 | -0.43780200 | 1.44611800  |
| H | -0.38279100 | -0.90825300 | 1.33176900  |
| H | -1.42630700 | -0.05814700 | 2.46665700  |
| C | -2.49126600 | -1.39497400 | 1.08181800  |
| H | -2.21603400 | -2.43334000 | 1.27147600  |
| H | -3.40891200 | -1.17020200 | 1.64318300  |
| N | -2.68420300 | -1.15021000 | -0.34645300 |
| C | -1.88892600 | -0.05227400 | -0.92100400 |
| C | -0.74127600 | -0.49370700 | -1.86875600 |
| H | -2.55427600 | 0.58487600  | -1.51475500 |
| H | -0.48933500 | 0.38030000  | -2.47382500 |
| H | -1.20375400 | -1.21769100 | -2.54596700 |
| S | -3.83435700 | -1.98586000 | -1.20093100 |
| O | -3.90448000 | -3.32843000 | -0.61831000 |
| O | -3.57691800 | -1.73983100 | -2.62153600 |
| C | -5.35089100 | -1.13278400 | -0.77099000 |
| C | -6.01222300 | -1.46090400 | 0.41545100  |
| C | -5.76554500 | -0.04916500 | -1.54953900 |
| C | -7.08403600 | -0.67279300 | 0.83401100  |
| H | -5.69221000 | -2.32409000 | 0.98878100  |
| C | -6.84139700 | 0.72308500  | -1.11786600 |
| H | -5.24808400 | 0.17372900  | -2.47628000 |
| C | -7.51029700 | 0.43144400  | 0.08097800  |

|    |             |             |             |
|----|-------------|-------------|-------------|
| H  | -7.60011200 | -0.92180100 | 1.75739700  |
| H  | -7.16797000 | 1.56710600  | -1.71952900 |
| C  | -8.68768300 | 1.26342100  | 0.52880400  |
| H  | -8.79843900 | 1.25088100  | 1.61705700  |
| H  | -8.59028700 | 2.30397400  | 0.20469100  |
| H  | -9.62076200 | 0.87643500  | 0.10174700  |
| C  | 6.43801600  | 2.44883000  | -1.24497900 |
| H  | 6.10240000  | 1.41052500  | -1.15889900 |
| H  | 7.22648600  | 2.52734100  | -1.99407700 |
| H  | 6.82199400  | 2.77972000  | -0.27289400 |
| In | 3.35506600  | -1.78199100 | 0.64649600  |
| Cl | 5.46938900  | -0.61031400 | 0.61412600  |
| Cl | 4.06879900  | -3.87659300 | 1.45232200  |
| Cl | 2.03817600  | -0.34950400 | 2.12350500  |
| C  | 1.81189800  | 3.67957500  | 0.37945500  |
| C  | 0.50483400  | 3.83818800  | 1.09222500  |
| H  | 0.62378800  | 3.84525300  | 2.18083800  |
| H  | 0.01264200  | 4.76846300  | 0.79949200  |

C-int3-R

0 1

|   |             |             |             |
|---|-------------|-------------|-------------|
| C | -1.05806300 | 0.42742900  | -1.63407200 |
| C | -0.13510800 | -0.55809300 | -2.04130800 |
| O | 1.04321400  | -0.42051000 | -2.43835700 |
| C | -0.80236100 | 1.80577900  | -1.99112800 |
| O | 0.12295500  | 2.26674500  | -2.64287600 |
| O | -0.64785100 | -1.85600900 | -2.00110800 |
| O | -1.81231100 | 2.64483600  | -1.52571600 |
| C | 0.28500800  | -2.88101700 | -2.39065000 |
| H | 1.14393200  | -2.90107700 | -1.71778500 |
| H | -0.27271700 | -3.82007400 | -2.33291100 |
| H | 0.63625900  | -2.71790000 | -3.41240000 |
| C | -1.68491700 | 4.00164700  | -1.94634800 |
| H | -2.50254500 | 4.53855000  | -1.46339300 |
| H | -0.72370500 | 4.42533900  | -1.64745600 |
| H | -1.76575400 | 4.08537200  | -3.03574500 |
| C | -4.93764100 | -3.24585100 | -0.18779000 |
| C | -5.85750800 | -2.85134700 | -1.22981000 |
| C | -7.24035700 | -3.18021800 | -1.11876100 |
| C | -7.65279900 | -3.91718400 | -0.03950300 |
| C | -6.71991900 | -4.33887500 | 0.96015400  |
| C | -5.38008800 | -4.02112500 | 0.90850300  |
| C | -3.73937000 | -2.02065400 | -1.70415500 |
| C | -5.12961300 | -2.17537200 | -2.19084900 |

|   |             |             |             |
|---|-------------|-------------|-------------|
| H | -7.94023900 | -2.85225200 | -1.88004900 |
| H | -8.69772800 | -4.18624800 | 0.07280900  |
| H | -7.08978800 | -4.92108900 | 1.79903300  |
| H | -4.69837600 | -4.32108100 | 1.69553000  |
| H | -2.94382100 | -2.38896600 | -2.35760300 |
| N | -3.70860200 | -2.77179700 | -0.45394500 |
| C | -0.61897700 | -2.14958500 | 1.45758600  |
| C | -2.82350800 | -1.94963500 | 2.40607000  |
| C | -0.07503100 | -1.44026100 | 2.52762500  |
| H | 0.04130700  | -2.43623200 | 0.64745200  |
| C | -2.29503800 | -1.23343800 | 3.47491400  |
| H | -3.89610000 | -2.09668800 | 2.34820000  |
| C | -0.91328400 | -0.98839200 | 3.55172700  |
| H | 0.98236100  | -1.21126100 | 2.53106800  |
| H | -2.93161300 | -0.85991800 | 4.27076100  |
| O | -0.48309300 | -0.28161500 | 4.63480400  |
| C | -5.62457200 | -1.31470200 | -3.28942600 |
| H | -5.00181000 | -1.44005800 | -4.18130900 |
| H | -6.65358600 | -1.56246500 | -3.55971100 |
| C | -5.54043600 | 0.20450700  | -2.82287900 |
| H | -5.11504500 | 0.79694000  | -3.63815200 |
| H | -6.53544400 | 0.58139700  | -2.59660800 |
| N | -4.68603400 | 0.38540500  | -1.64707600 |
| C | -3.45673300 | -0.39983500 | -1.72576100 |
| C | -2.27244000 | 0.05740100  | -0.83441600 |
| H | -3.13319300 | -0.26789700 | -2.76264600 |
| H | -2.04095800 | -0.71062900 | -0.10601000 |
| H | -2.59296600 | 0.92991800  | -0.26963400 |
| S | -5.47696300 | 0.54787600  | -0.12830600 |
| O | -5.10087300 | -0.57110100 | 0.74484700  |
| O | -6.89059100 | 0.79948700  | -0.43886100 |
| C | -4.76690600 | 2.02623600  | 0.56773000  |
| C | -4.13133000 | 1.94562800  | 1.80653400  |
| C | -4.92820300 | 3.24453600  | -0.09314500 |
| C | -3.65681900 | 3.11731400  | 2.39136600  |
| H | -3.99996000 | 0.98336900  | 2.28839500  |
| C | -4.43907900 | 4.40046100  | 0.50508600  |
| H | -5.42442300 | 3.28529000  | -1.05658800 |
| C | -3.79319000 | 4.35584100  | 1.75087600  |
| H | -3.16122700 | 3.06331500  | 3.35623900  |
| H | -4.55755200 | 5.35474600  | -0.00088600 |
| C | -3.21472800 | 5.60883900  | 2.35798700  |
| H | -3.81738900 | 6.48911900  | 2.11541300  |
| H | -3.13950400 | 5.53173400  | 3.44623500  |

|    |             |             |             |
|----|-------------|-------------|-------------|
| H  | -2.20349200 | 5.78461200  | 1.97080400  |
| C  | 0.92358200  | -0.24520800 | 4.89192900  |
| H  | 1.47638200  | 0.30412300  | 4.12293800  |
| H  | 1.03547800  | 0.26573500  | 5.84926600  |
| H  | 1.33342600  | -1.26031300 | 4.96802600  |
| Rh | 2.55492900  | 0.03953000  | -0.84156300 |
| O  | 1.17289400  | 0.99704900  | 0.40736900  |
| O  | 3.12170000  | 1.84887200  | -1.63845500 |
| O  | 2.70838300  | 1.27953800  | 2.05118100  |
| O  | 4.58421200  | 2.24520000  | 0.05245200  |
| C  | 1.55571300  | 1.44868900  | 1.52928300  |
| C  | 0.55550800  | 2.24483000  | 2.35391700  |
| C  | -0.27301000 | 3.28062600  | 1.57793400  |
| H  | -0.79299900 | 2.78061800  | 0.75510600  |
| H  | -1.04702000 | 3.64424300  | 2.26063400  |
| C  | 3.00161900  | 4.72153400  | -2.01469900 |
| H  | 3.32043000  | 5.57675600  | -2.62327100 |
| H  | 2.38208400  | 4.07844900  | -2.64925800 |
| C  | 4.26157400  | 3.93417900  | -1.60519900 |
| C  | 3.96686500  | 2.56403300  | -1.01771700 |
| Rh | 4.20117900  | 0.41108000  | 0.90471900  |
| O  | 5.60201300  | -0.44063400 | -0.37088900 |
| O  | 3.71825400  | -1.47509600 | 1.67387400  |
| O  | 4.03232900  | -0.88261200 | -1.95046300 |
| O  | 2.18559600  | -1.82590600 | 0.04373000  |
| C  | 5.21406900  | -0.92723800 | -1.48023400 |
| C  | 6.25443600  | -1.63848800 | -2.33285200 |
| C  | 7.19006900  | -2.57541700 | -1.54792200 |
| H  | 7.63366600  | -2.00678800 | -0.72284700 |
| H  | 8.01198000  | -2.86777900 | -2.21276100 |
| C  | 3.94684700  | -4.36142200 | 1.96109700  |
| H  | 3.64900200  | -5.26692800 | 2.50376900  |
| H  | 4.48980900  | -3.72744500 | 2.67099300  |
| C  | 2.66779600  | -3.62102000 | 1.53364000  |
| C  | 2.88594200  | -2.19488400 | 1.04373200  |
| H  | 5.72657000  | -2.17467000 | -3.12684200 |
| H  | 6.85091900  | -0.85196000 | -2.81240900 |
| H  | 4.88289600  | 3.76290600  | -2.49324000 |
| H  | 4.86630800  | 4.48918500  | -0.88178000 |
| H  | -0.13106600 | 1.51707200  | 2.80170900  |
| H  | 1.10836100  | 2.71638500  | 3.17206000  |
| H  | 2.13863200  | -4.16717500 | 0.74638100  |
| H  | 1.98157300  | -3.54987300 | 2.38698400  |
| C  | 6.52205600  | -3.84547700 | -0.98867600 |

|   |             |             |             |
|---|-------------|-------------|-------------|
| H | 6.12129100  | -4.44886700 | -1.81601200 |
| H | 7.29732500  | -4.45882700 | -0.50869300 |
| C | 5.41147200  | -3.54448800 | 0.02387100  |
| H | 5.76820100  | -2.79008500 | 0.73199500  |
| H | 4.57349100  | -3.08238500 | -0.50728200 |
| C | 4.88505800  | -4.75291700 | 0.80406100  |
| H | 5.73067000  | -5.31647200 | 1.22173300  |
| H | 4.36392200  | -5.44183500 | 0.12316700  |
| C | 2.15110100  | 5.22892300  | -0.83566500 |
| H | 2.74298800  | 5.91163200  | -0.20839000 |
| H | 1.32437300  | 5.82770900  | -1.24445100 |
| C | 1.57963100  | 4.08607600  | 0.00992800  |
| H | 1.16883500  | 3.33107000  | -0.66503200 |
| H | 2.40085700  | 3.60354200  | 0.54856100  |
| C | 0.50883300  | 4.48573500  | 1.02960000  |
| H | -0.21244700 | 5.16762100  | 0.55604000  |
| H | 0.96248000  | 5.04863900  | 1.85844000  |
| C | -1.98604500 | -2.42797200 | 1.38654400  |
| C | -2.48846300 | -3.25131500 | 0.21666100  |
| H | -1.70821200 | -3.28422500 | -0.54177400 |
| H | -2.69065000 | -4.28345800 | 0.52660900  |

C-int4-R

0 1

|    |             |             |             |
|----|-------------|-------------|-------------|
| C  | -2.09935000 | -0.16074200 | -1.19345700 |
| C  | -2.06904000 | -0.14649900 | 0.43073600  |
| Rh | 2.43550200  | -0.85534400 | -0.54200900 |
| O  | 2.23363400  | 1.13353800  | 0.05068000  |
| O  | 3.43797200  | -0.27466400 | -2.27752900 |
| O  | 4.26725500  | 1.10550800  | 1.05160300  |
| O  | 5.43648500  | -0.28360700 | -1.20518500 |
| C  | 3.19771800  | 1.68321700  | 0.67831000  |
| C  | 3.05684300  | 3.15978400  | 1.00782200  |
| C  | 2.60648700  | 4.04697500  | -0.16945400 |
| H  | 1.65342300  | 3.67093300  | -0.55770900 |
| H  | 2.40155600  | 5.04306700  | 0.23725800  |
| C  | 4.63886600  | 1.61154500  | -4.16016700 |
| H  | 5.11697800  | 1.78014500  | -5.13233000 |
| H  | 3.60988100  | 1.29527700  | -4.36671200 |
| C  | 5.37754700  | 0.44956000  | -3.46976600 |
| C  | 4.69550000  | -0.07895500 | -2.21895000 |
| Rh | 4.57137000  | -0.88244200 | 0.56513700  |
| O  | 4.75647800  | -2.86520000 | -0.01769300 |
| O  | 3.58589600  | -1.43862100 | 2.31148800  |

|   |             |             |             |
|---|-------------|-------------|-------------|
| O | 2.73532900  | -2.82302600 | -1.04847400 |
| O | 1.59395100  | -1.47510300 | 1.23669500  |
| C | 3.79847200  | -3.40707600 | -0.65680900 |
| C | 3.91725300  | -4.88506900 | -0.98557300 |
| C | 4.36528800  | -5.76701300 | 0.19583700  |
| H | 5.30889900  | -5.36900900 | 0.58646900  |
| H | 4.58130500  | -6.76650500 | -0.20013700 |
| C | 2.33198400  | -3.34610300 | 4.18737900  |
| H | 1.84258000  | -3.51326500 | 5.15426000  |
| H | 3.37223400  | -3.07400700 | 4.39997200  |
| C | 1.64085100  | -2.14269200 | 3.51815400  |
| C | 2.33433400  | -1.64479900 | 2.26243600  |
| H | 2.95480700  | -5.21614300 | -1.38551600 |
| H | 4.65596900  | -4.96629800 | -1.79296800 |
| H | 5.44878000  | -0.39549300 | -4.16626500 |
| H | 6.39752700  | 0.73493500  | -3.19748800 |
| H | 2.31000200  | 3.23284300  | 1.80937500  |
| H | 4.01108900  | 3.50233800  | 1.41757900  |
| H | 0.60272300  | -2.37329700 | 3.26262400  |
| H | 1.62840800  | -1.30081900 | 4.22190300  |
| C | 3.35006800  | -5.89077900 | 1.34732200  |
| H | 2.40825300  | -6.31329400 | 0.96971500  |
| H | 3.74407100  | -6.61590200 | 2.07253900  |
| C | 3.08154300  | -4.55851300 | 2.05619800  |
| H | 4.03836400  | -4.05959900 | 2.24378500  |
| H | 2.52792600  | -3.90738100 | 1.37431200  |
| C | 2.30430900  | -4.65412500 | 3.37476600  |
| H | 2.73648000  | -5.45005000 | 3.99639000  |
| H | 1.26276100  | -4.94721400 | 3.17917700  |
| C | 4.61856000  | 2.93696400  | -3.37539700 |
| H | 5.64893200  | 3.27947200  | -3.20439500 |
| H | 4.14119400  | 3.70015000  | -4.00485400 |
| C | 3.87145900  | 2.84026800  | -2.04095900 |
| H | 2.91169400  | 2.34055400  | -2.20534900 |
| H | 4.43908500  | 2.19086400  | -1.36903400 |
| C | 3.60986900  | 4.17193300  | -1.32962400 |
| H | 3.20536500  | 4.89601600  | -2.04985000 |
| H | 4.55605600  | 4.59499900  | -0.96370700 |
| C | -0.68643400 | -0.20455700 | -1.78482500 |
| O | 0.22919000  | -0.81843100 | -1.26388800 |
| C | -2.70106400 | -1.48880800 | -1.72325700 |
| O | -2.03433400 | -2.47073900 | -1.96697800 |
| O | -0.59211100 | 0.42756600  | -2.95127100 |
| O | -4.03281100 | -1.45068900 | -1.88008100 |

|   |              |             |             |
|---|--------------|-------------|-------------|
| C | 0.70077500   | 0.38058300  | -3.59856400 |
| H | 1.04581500   | -0.65128300 | -3.68374900 |
| H | 0.54844300   | 0.83323400  | -4.57731400 |
| H | 1.42852700   | 0.94455700  | -3.01621200 |
| C | -4.64047100  | -2.72419400 | -2.17679600 |
| H | -5.71064000  | -2.53022400 | -2.22327500 |
| H | -4.26351900  | -3.11683100 | -3.12405500 |
| H | -4.41667300  | -3.43062900 | -1.37395500 |
| C | -3.83977400  | -1.49898900 | 1.16921800  |
| C | -2.43613500  | -1.48004100 | 1.01926400  |
| C | -1.66500100  | -2.59859200 | 1.29357700  |
| C | -2.30616800  | -3.75358100 | 1.76501500  |
| C | -3.69483200  | -3.77042600 | 1.92294400  |
| C | -4.48493900  | -2.65050300 | 1.62408500  |
| C | -3.30910900  | 0.69673400  | 0.79783700  |
| H | -0.59282100  | -2.56578400 | 1.12834000  |
| H | -1.72350800  | -4.64089000 | 1.99400000  |
| H | -4.18156500  | -4.67222600 | 2.28480700  |
| H | -5.56262500  | -2.68147400 | 1.73833500  |
| H | -3.19869000  | 1.13165100  | 1.80349100  |
| N | -4.40829500  | -0.26437600 | 0.79069600  |
| C | -6.97135800  | -0.55385100 | -0.69421600 |
| C | -7.93326500  | -1.02694900 | 1.45463100  |
| C | -8.07976000  | -1.11956900 | -1.32806700 |
| H | -6.14767400  | -0.17418100 | -1.28981200 |
| C | -9.04490500  | -1.59485700 | 0.84151600  |
| H | -7.88067100  | -1.00046900 | 2.54061100  |
| C | -9.12595600  | -1.64501000 | -0.55680000 |
| H | -8.11751700  | -1.14247100 | -2.41096400 |
| H | -9.86112900  | -2.01196900 | 1.42202600  |
| O | -10.25241300 | -2.22527900 | -1.06452100 |
| C | -0.87060900  | 0.63841200  | 0.98662600  |
| H | -1.02804700  | 0.74799600  | 2.06433300  |
| H | 0.07316600   | 0.12447800  | 0.85209400  |
| C | -0.78719700  | 2.02230900  | 0.32589300  |
| H | -0.13048700  | 2.66852200  | 0.91256500  |
| H | -0.33375800  | 1.95174000  | -0.66873900 |
| N | -2.12423300  | 2.67412000  | 0.24513300  |
| C | -3.24616200  | 1.81453000  | -0.24225900 |
| C | -2.92861400  | 1.10687500  | -1.57184300 |
| H | -4.13671700  | 2.44110300  | -0.29687100 |
| H | -2.38737400  | 1.76447400  | -2.25230300 |
| H | -3.85746200  | 0.81144500  | -2.05804900 |
| S | -2.06264300  | 4.21917200  | -0.44592200 |



|   |              |             |             |
|---|--------------|-------------|-------------|
| O | -3.45339800  | 4.66397900  | -0.60200200 |
| O | -1.15297300  | 4.25327800  | -1.60543700 |
| C | -1.26896900  | 5.13480200  | 0.87440400  |
| C | -1.71079800  | 4.99179500  | 2.19166600  |
| C | -0.24356600  | 6.02222400  | 0.55102900  |
| C | -1.09878600  | 5.73850000  | 3.19442900  |
| H | -2.50570500  | 4.29068600  | 2.42085400  |
| C | 0.35152400   | 6.76899100  | 1.56709400  |
| H | 0.08468200   | 6.10844700  | -0.47857200 |
| C | -0.05966400  | 6.63530000  | 2.90008600  |
| H | -1.43153800  | 5.62584000  | 4.22282500  |
| H | 1.15124200   | 7.46239400  | 1.32056200  |
| C | 0.62116200   | 7.41329500  | 3.99975400  |
| H | -0.06246300  | 7.61779100  | 4.82886200  |
| H | 1.46931800   | 6.84889900  | 4.40671200  |
| H | 1.01012700   | 8.36775200  | 3.63346800  |
| C | -10.38481000 | -2.31317300 | -2.47441800 |
| H | -9.58018200  | -2.91260700 | -2.92163500 |
| H | -11.34138400 | -2.80501700 | -2.65829600 |
| H | -10.39384000 | -1.32087700 | -2.94501100 |
| C | -6.87950800  | -0.49800700 | 0.69801800  |
| C | -5.68262500  | 0.15228300  | 1.36404100  |
| H | -5.74636900  | 1.23978200  | 1.23666500  |
| H | -5.70901100  | -0.04028800 | 2.44984200  |

C-TS3-I

|     |             |             |             |
|-----|-------------|-------------|-------------|
| O 1 |             |             |             |
| C   | 0.74524000  | -1.21312300 | -1.08638200 |
| C   | 1.54580500  | -2.30552000 | -0.66755600 |
| O   | 2.78148100  | -2.30430000 | -0.46678000 |
| C   | 1.44294100  | -0.03151200 | -1.45947700 |
| O   | 2.65744400  | 0.24217100  | -1.24483300 |
| O   | 0.88505100  | -3.48535100 | -0.46049100 |
| O   | 0.71156700  | 0.86996500  | -2.14014000 |
| C   | 1.70968100  | -4.58176400 | -0.00835800 |
| H   | 2.20853700  | -4.32553800 | 0.92871300  |
| H   | 1.02200900  | -5.41763100 | 0.12836400  |
| H   | 2.46703400  | -4.82534200 | -0.75587600 |
| C   | 1.39755500  | 2.06132300  | -2.57465200 |
| H   | 0.61092700  | 2.76216600  | -2.85292400 |
| H   | 2.00966800  | 2.47013800  | -1.77228000 |
| H   | 2.03184900  | 1.82974000  | -3.43471400 |
| C   | -2.45886700 | -0.20336200 | 2.26096800  |
| C   | -3.36673200 | -1.31292300 | 2.19365500  |

|   |             |             |             |
|---|-------------|-------------|-------------|
| C | -4.69019000 | -1.17475300 | 2.69014700  |
| C | -5.04623400 | 0.01745200  | 3.27830100  |
| C | -4.11099100 | 1.08998200  | 3.38525800  |
| C | -2.82666000 | 1.00594600  | 2.88557100  |
| C | -1.38059800 | -1.88361600 | 1.21798900  |
| C | -2.66229800 | -2.38584800 | 1.63139000  |
| H | -5.39216700 | -2.00006700 | 2.62134600  |
| H | -6.04578600 | 0.14984900  | 3.67927400  |
| H | -4.42666200 | 2.00698000  | 3.87404900  |
| H | -2.13030100 | 1.83348900  | 2.94718000  |
| H | -0.45990700 | -2.45626400 | 1.26291100  |
| N | -1.27935300 | -0.55085900 | 1.68028500  |
| C | 1.48746200  | 2.04280100  | 1.49426900  |
| C | -0.72206700 | 2.13437400  | 0.54464700  |
| C | 1.79927400  | 3.27983600  | 0.93639900  |
| H | 2.25811000  | 1.51517500  | 2.04789600  |
| C | -0.42678500 | 3.37942400  | -0.00445300 |
| H | -1.69264300 | 1.69163700  | 0.35091800  |
| C | 0.83418400  | 3.95900800  | 0.18337800  |
| H | 2.80484600  | 3.65913000  | 1.06047400  |
| H | -1.14670200 | 3.90854000  | -0.61594700 |
| O | 1.03576900  | 5.15703200  | -0.43746500 |
| C | -3.21787800 | -3.64895500 | 1.09497000  |
| H | -2.45865000 | -4.43522100 | 1.10388600  |
| H | -4.06673700 | -3.99979100 | 1.68686000  |
| C | -3.70996200 | -3.41143800 | -0.38665600 |
| H | -3.56592200 | -4.33626500 | -0.95454500 |
| H | -4.76900100 | -3.16348000 | -0.40687700 |
| N | -2.96896100 | -2.31198800 | -1.01567700 |
| C | -1.61690700 | -2.22030700 | -0.68421600 |
| C | -0.72423200 | -1.27603300 | -1.44704200 |
| H | -1.18848200 | -3.21278100 | -0.57730500 |
| H | -1.12843800 | -0.26551000 | -1.37861700 |
| H | -0.85464700 | -1.57224500 | -2.49927800 |
| S | -3.82014100 | -1.29946700 | -2.14791700 |
| O | -5.19864700 | -1.78378200 | -2.06425900 |
| O | -3.06982500 | -1.34266800 | -3.40055500 |
| C | -3.77755900 | 0.37167800  | -1.52717000 |
| C | -4.53852400 | 0.70221600  | -0.40331400 |
| C | -3.10773900 | 1.34655900  | -2.26850200 |
| C | -4.59835400 | 2.03235000  | -0.00430700 |
| H | -5.07810000 | -0.06176900 | 0.14346700  |
| C | -3.20359200 | 2.67621900  | -1.86449300 |
| H | -2.53435200 | 1.06411300  | -3.14371700 |

|    |             |             |             |
|----|-------------|-------------|-------------|
| C  | -3.93591800 | 3.03899900  | -0.72574000 |
| H  | -5.17326100 | 2.29458700  | 0.87813400  |
| H  | -2.69548500 | 3.44218700  | -2.44235100 |
| C  | -3.97653100 | 4.46953500  | -0.25334800 |
| H  | -3.80027400 | 5.17018900  | -1.07388300 |
| H  | -4.93730000 | 4.71339900  | 0.20911400  |
| H  | -3.19390800 | 4.63922000  | 0.49618900  |
| C  | 2.33162800  | 5.74166600  | -0.34298600 |
| H  | 3.10424500  | 5.08057100  | -0.75496800 |
| H  | 2.28907700  | 6.66143000  | -0.92841600 |
| H  | 2.58938800  | 5.98487300  | 0.69560800  |
| In | 4.07062100  | -0.59845800 | 0.08903900  |
| Cl | 5.90613300  | -1.74205500 | -0.82135700 |
| Cl | 3.26487900  | -1.10944900 | 2.31672900  |
| Cl | 4.87885600  | 1.63572500  | 0.48485900  |
| C  | 0.23057600  | 1.45552800  | 1.31192100  |
| C  | 0.00582000  | 0.10706700  | 1.96218300  |
| H  | 0.79296200  | -0.58104500 | 1.65435300  |
| H  | 0.09033500  | 0.19820200  | 3.05230700  |

C-TS3-n

0 1

|   |             |             |             |
|---|-------------|-------------|-------------|
| C | 1.19124100  | 2.66246700  | -0.55104100 |
| C | 1.80126200  | 3.58760300  | 0.35968800  |
| O | 1.35218700  | 4.60396000  | 0.86625400  |
| C | -0.07948500 | 3.02583700  | -1.13099400 |
| O | -0.85243700 | 3.90745000  | -0.78833800 |
| O | 3.11419600  | 3.17581600  | 0.71071200  |
| O | -0.41214300 | 2.20100000  | -2.22021700 |
| C | 3.79263400  | 4.08052100  | 1.58238500  |
| H | 3.25305200  | 4.20773500  | 2.52638900  |
| H | 4.77695500  | 3.64220600  | 1.76439600  |
| H | 3.90053600  | 5.06729500  | 1.12291100  |
| C | -1.62549000 | 2.56773600  | -2.87510000 |
| H | -1.77872300 | 1.82161700  | -3.65927700 |
| H | -2.46967400 | 2.56910400  | -2.18065100 |
| H | -1.54687700 | 3.56486000  | -3.31935100 |
| C | 0.02151600  | -1.09667300 | 1.99964000  |
| C | 1.28324200  | -1.74352600 | 2.22322100  |
| C | 1.33096800  | -3.11201200 | 2.59393200  |
| C | 0.14433600  | -3.78045700 | 2.79375600  |
| C | -1.09964400 | -3.11164300 | 2.62465100  |
| C | -1.18586400 | -1.79067200 | 2.22644200  |
| C | 1.65104700  | 0.40771300  | 1.53538200  |

|   |             |             |             |
|---|-------------|-------------|-------------|
| C | 2.28543300  | -0.78284500 | 2.03085800  |
| H | 2.28651800  | -3.60831800 | 2.73244400  |
| H | 0.14872400  | -4.82432300 | 3.09042800  |
| H | -2.01714700 | -3.66421000 | 2.80455800  |
| H | -2.14336800 | -1.31117400 | 2.08203500  |
| H | 1.94448600  | 1.41677800  | 1.81463700  |
| N | 0.24529900  | 0.18922100  | 1.58656500  |
| C | -3.21465000 | 1.20757800  | 2.06045900  |
| C | -2.25991400 | 0.67446500  | -0.07923100 |
| C | -4.50197700 | 0.98433500  | 1.56203500  |
| H | -3.09931100 | 1.50128600  | 3.10061700  |
| C | -3.52947400 | 0.44802300  | -0.58847100 |
| H | -1.39813900 | 0.56457200  | -0.72539500 |
| C | -4.66134700 | 0.59511400  | 0.22793100  |
| H | -5.35564300 | 1.11272900  | 2.21614600  |
| H | -3.67539500 | 0.16166600  | -1.62369600 |
| O | -5.85790600 | 0.32659100  | -0.37125800 |
| C | 3.74239500  | -1.02195000 | 1.88555500  |
| H | 4.30707300  | -0.13883000 | 2.19622800  |
| H | 4.07427500  | -1.85936400 | 2.50488800  |
| C | 4.07541200  | -1.35233400 | 0.38194300  |
| H | 5.09182200  | -1.00737100 | 0.16312400  |
| H | 4.04003500  | -2.42560900 | 0.20501300  |
| N | 3.11701700  | -0.70275600 | -0.52019900 |
| C | 2.62380400  | 0.54220700  | -0.09371700 |
| C | 1.88490100  | 1.43691600  | -1.06516300 |
| H | 3.42467100  | 1.08973400  | 0.39770400  |
| H | 1.16743800  | 0.85948700  | -1.63634900 |
| H | 2.69185700  | 1.68979800  | -1.77641400 |
| S | 2.60057300  | -1.55528700 | -1.93021600 |
| O | 3.32206900  | -2.82886200 | -1.85096800 |
| O | 2.77349300  | -0.64993400 | -3.06349900 |
| C | 0.85601900  | -1.90470900 | -1.76017500 |
| C | 0.45418800  | -2.93067300 | -0.90302600 |
| C | -0.06174000 | -1.23416500 | -2.57070100 |
| C | -0.89359900 | -3.26464500 | -0.84046300 |
| H | 1.18241100  | -3.46282800 | -0.30274800 |
| C | -1.40547300 | -1.59387100 | -2.49920500 |
| H | 0.27216000  | -0.45158900 | -3.24160500 |
| C | -1.84457800 | -2.60186700 | -1.63044700 |
| H | -1.21175900 | -4.05238600 | -0.16548100 |
| H | -2.12328500 | -1.07898200 | -3.13096800 |
| C | -3.30781800 | -2.94214900 | -1.51670500 |
| H | -3.83150900 | -2.78980900 | -2.46472900 |

|   |             |             |             |
|---|-------------|-------------|-------------|
| H | -3.45668000 | -3.97947800 | -1.20396900 |
| H | -3.78770700 | -2.29295300 | -0.77479900 |
| C | -7.04374400 | 0.50815300  | 0.38912200  |
| H | -7.14794900 | 1.54484200  | 0.73430100  |
| H | -7.87099200 | 0.26720100  | -0.27994600 |
| H | -7.07562000 | -0.16326000 | 1.25767400  |
| C | -2.08430300 | 1.05664300  | 1.25723500  |
| C | -0.70567100 | 1.30492500  | 1.81649900  |
| H | -0.26612600 | 2.18966000  | 1.35277600  |
| H | -0.76892600 | 1.47481200  | 2.89875600  |

C-TS3-R

0 1

|   |             |             |             |
|---|-------------|-------------|-------------|
| C | -0.56783700 | -1.23915900 | 1.77199500  |
| C | 0.07690400  | -0.08283000 | 2.26468800  |
| O | 1.27494100  | 0.07500300  | 2.58194800  |
| C | 0.09508300  | -2.51761600 | 1.92076000  |
| O | 1.02622300  | -2.79402000 | 2.65735500  |
| O | -0.76279500 | 1.02760700  | 2.33349700  |
| O | -0.46864700 | -3.49945500 | 1.11097500  |
| C | -0.11643800 | 2.25281000  | 2.71895700  |
| H | 0.71120900  | 2.47685300  | 2.04694000  |
| H | -0.88550100 | 3.02571300  | 2.64391700  |
| H | 0.25568600  | 2.18926300  | 3.74483000  |
| C | 0.16432500  | -4.77155300 | 1.23946000  |
| H | -0.35575800 | -5.43065300 | 0.54528000  |
| H | 1.22674100  | -4.71002200 | 0.98536500  |
| H | 0.08288500  | -5.15538300 | 2.26161700  |
| C | -4.84120300 | 1.49814200  | -0.37438400 |
| C | -5.77205100 | 0.92874900  | 0.55592400  |
| C | -7.11559900 | 0.71572900  | 0.15948100  |
| C | -7.49826100 | 1.10478200  | -1.10494700 |
| C | -6.56674600 | 1.69998600  | -2.00071300 |
| C | -5.24219300 | 1.90176400  | -1.65978200 |
| C | -3.68305800 | 0.93653300  | 1.47907700  |
| C | -5.06512000 | 0.65690800  | 1.73989900  |
| H | -7.82049800 | 0.25045100  | 0.84082300  |
| H | -8.52158900 | 0.95433400  | -1.43321000 |
| H | -6.90941500 | 1.99863300  | -2.98703900 |
| H | -4.54021900 | 2.35377200  | -2.34943300 |
| H | -2.95943200 | 1.29981000  | 2.19880600  |
| N | -3.60691300 | 1.52106500  | 0.19960500  |
| C | -2.34890500 | 4.18590300  | -1.85153500 |
| C | -2.71594800 | 4.44868200  | 0.50740600  |

|    |             |             |             |
|----|-------------|-------------|-------------|
| C  | -2.38003100 | 5.57359400  | -2.02602100 |
| H  | -2.18856600 | 3.55097900  | -2.71996500 |
| C  | -2.75594000 | 5.82589100  | 0.35535500  |
| H  | -2.85342700 | 4.01630400  | 1.49498700  |
| C  | -2.58075900 | 6.40078900  | -0.91532200 |
| H  | -2.24812100 | 5.98773900  | -3.01803200 |
| H  | -2.91294100 | 6.48618700  | 1.20163900  |
| O  | -2.62825800 | 7.76078300  | -0.95612100 |
| C  | -5.49394300 | -0.20712200 | 2.86602400  |
| H  | -5.01284800 | 0.10761700  | 3.79674400  |
| H  | -6.57515000 | -0.15550100 | 3.01545700  |
| C  | -5.09191700 | -1.72099100 | 2.57888200  |
| H  | -4.69352600 | -2.16497400 | 3.49536900  |
| H  | -5.96276100 | -2.29100700 | 2.26263600  |
| N  | -4.06004600 | -1.83134700 | 1.54407400  |
| C  | -3.01882300 | -0.90662100 | 1.66367600  |
| C  | -1.73137000 | -1.06958200 | 0.84510500  |
| H  | -2.79813900 | -0.75885800 | 2.72034300  |
| H  | -1.59853900 | -0.23467700 | 0.16022100  |
| H  | -1.81731300 | -1.95815800 | 0.22690900  |
| S  | -4.58160400 | -2.28801100 | -0.06859300 |
| O  | -4.10270800 | -1.27271700 | -1.00850600 |
| O  | -6.00773800 | -2.60085400 | 0.06344900  |
| C  | -3.69036400 | -3.80154200 | -0.37575800 |
| C  | -2.77863500 | -3.84329500 | -1.42860400 |
| C  | -3.97125300 | -4.93374000 | 0.39230300  |
| C  | -2.13439600 | -5.04592600 | -1.71168300 |
| H  | -2.57898600 | -2.94993300 | -2.00831800 |
| C  | -3.31568800 | -6.12317800 | 0.09540800  |
| H  | -4.69472100 | -4.88600200 | 1.19920700  |
| C  | -2.39027500 | -6.19856700 | -0.95924100 |
| H  | -1.41638100 | -5.08433000 | -2.52490700 |
| H  | -3.52371800 | -7.00970000 | 0.68789700  |
| C  | -1.65497700 | -7.48466200 | -1.24336200 |
| H  | -1.27575100 | -7.51241000 | -2.26827100 |
| H  | -0.79362500 | -7.59101900 | -0.57221800 |
| H  | -2.29739800 | -8.35668200 | -1.08872800 |
| C  | -2.40427500 | 8.40443300  | -2.20275500 |
| H  | -3.17095400 | 8.13548300  | -2.94137900 |
| H  | -2.45941600 | 9.47546400  | -2.00311900 |
| H  | -1.41338400 | 8.16234200  | -2.60891200 |
| Rh | 3.88768800  | 0.17810700  | -1.34378500 |
| O  | 4.88104000  | -1.50814300 | -0.65243100 |
| O  | 2.47548400  | -1.03330700 | -2.29225900 |

|    |             |             |             |
|----|-------------|-------------|-------------|
| O  | 3.62030700  | -1.56153700 | 1.23552800  |
| O  | 1.25673700  | -1.14565500 | -0.38615100 |
| C  | 4.50642700  | -2.02395700 | 0.45098600  |
| C  | 5.16904300  | -3.32041000 | 0.89147300  |
| C  | 5.34253700  | -4.36824400 | -0.22308500 |
| H  | 5.85818800  | -3.89482500 | -1.06647600 |
| H  | 6.00718300  | -5.15420100 | 0.15598900  |
| C  | 1.19117000  | -3.56340600 | -3.03766500 |
| H  | 0.41641400  | -4.06116400 | -3.63571700 |
| H  | 1.89265800  | -3.11228500 | -3.74846500 |
| C  | 0.52591000  | -2.43727700 | -2.22689500 |
| C  | 1.50416400  | -1.45759700 | -1.59391100 |
| Rh | 2.53810400  | 0.08188100  | 0.67138300  |
| O  | 1.47317500  | 1.73591100  | -0.07353200 |
| O  | 3.93439800  | 1.31729600  | 1.58067600  |
| O  | 2.82167800  | 1.86643200  | -1.89461200 |
| O  | 5.18210000  | 1.40974900  | -0.31404000 |
| C  | 1.88823800  | 2.28999600  | -1.14379200 |
| C  | 1.20561400  | 3.58040200  | -1.57217800 |
| C  | 0.96016300  | 4.59217200  | -0.43947100 |
| H  | 0.41233800  | 4.08788600  | 0.36279800  |
| H  | 0.29015100  | 5.36881600  | -0.82510200 |
| C  | 5.15371500  | 3.82518400  | 2.37539200  |
| H  | 5.91869400  | 4.34615200  | 2.96403900  |
| H  | 4.47949100  | 3.33749500  | 3.08827600  |
| C  | 5.85612700  | 2.73126600  | 1.54976900  |
| C  | 4.91335400  | 1.73724000  | 0.88750100  |
| H  | 1.80226900  | 4.02079800  | -2.37617200 |
| H  | 0.23850000  | 3.29565600  | -2.00383700 |
| H  | -0.12780700 | -1.84981800 | -2.88529500 |
| H  | -0.08649600 | -2.84430000 | -1.41787300 |
| H  | 6.15744300  | -3.04682100 | 1.28227400  |
| H  | 4.58563200  | -3.71789800 | 1.72665700  |
| H  | 6.48746000  | 3.16458100  | 0.76846900  |
| H  | 6.50911200  | 2.14684300  | 2.21038600  |
| C  | 2.22630700  | 5.25149000  | 0.13768800  |
| H  | 2.73665000  | 5.82297900  | -0.65105700 |
| H  | 1.91531000  | 5.98503000  | 0.89457200  |
| C  | 3.20097100  | 4.24956300  | 0.76657600  |
| H  | 2.64872000  | 3.57373600  | 1.42681300  |
| H  | 3.61259400  | 3.62096700  | -0.02832600 |
| C  | 4.36438800  | 4.86227200  | 1.55397100  |
| H  | 3.97622500  | 5.62322100  | 2.24552000  |
| H  | 5.04465800  | 5.38856600  | 0.86899000  |

|   |             |             |             |
|---|-------------|-------------|-------------|
| C | 1.92865200  | -4.61345700 | -2.18617800 |
| H | 1.21370900  | -5.11545600 | -1.51875100 |
| H | 2.32208800  | -5.38869400 | -2.85827400 |
| C | 3.07909200  | -4.01150100 | -1.37041000 |
| H | 3.65350600  | -3.34230000 | -2.01860100 |
| H | 2.65768500  | -3.38052800 | -0.58157000 |
| C | 4.03954300  | -5.01802300 | -0.72656100 |
| H | 4.30488800  | -5.79155300 | -1.46072600 |
| H | 3.54034900  | -5.53925000 | 0.10330800  |
| C | -2.50419400 | 3.60483900  | -0.59440000 |
| C | -2.40591600 | 2.10648000  | -0.40577000 |
| H | -2.22953100 | 1.61048500  | -1.36653100 |
| H | -1.56393900 | 1.85614000  | 0.24281900  |

4-TS4-I

0 1

|   |             |             |             |
|---|-------------|-------------|-------------|
| C | 0.52005400  | -0.99360500 | -1.22947200 |
| C | 1.78237800  | -0.35361400 | -1.61455900 |
| O | 2.91518900  | -0.66590000 | -1.19238100 |
| C | 0.71771000  | -2.41479500 | -0.87256100 |
| O | 1.73463500  | -2.90477600 | -0.35969000 |
| O | 1.64695400  | 0.68443700  | -2.42952000 |
| O | -0.31453800 | -3.19135100 | -1.18623100 |
| C | 2.84937800  | 1.43342300  | -2.74842500 |
| H | 3.46783800  | 0.84948800  | -3.43289200 |
| H | 2.49249100  | 2.34729300  | -3.21978400 |
| H | 3.40470700  | 1.65606300  | -1.83920100 |
| C | -0.22276400 | -4.58034100 | -0.79742000 |
| H | 0.62055900  | -5.05899200 | -1.29886600 |
| H | -0.08544300 | -4.65639100 | 0.28414500  |
| H | -1.16936800 | -5.01973900 | -1.10792300 |
| C | -0.86453900 | 1.36921900  | 2.10470400  |
| C | -1.98508700 | 0.90679300  | 1.37944100  |
| C | -3.27041700 | 1.18934400  | 1.80346300  |
| C | -3.43479200 | 1.98410900  | 2.95174300  |
| C | -2.32455900 | 2.42912400  | 3.66807700  |
| C | -1.01513000 | 2.12197800  | 3.26030400  |
| C | -0.02803000 | 0.48620800  | 0.20229900  |
| C | -1.41783000 | -0.07582700 | 0.37029000  |
| H | -4.13145400 | 0.82404000  | 1.25527000  |
| H | -4.43478900 | 2.24753900  | 3.28200600  |
| H | -2.46598300 | 3.03116600  | 4.56047900  |
| H | -0.16345400 | 2.47891800  | 3.82791700  |
| H | 0.20151200  | 1.14002300  | -0.63592000 |



|   |             |             |             |
|---|-------------|-------------|-------------|
| N | 0.33929300  | 1.01671200  | 1.41583800  |
| C | 3.18220100  | 3.17541700  | 0.31232300  |
| C | 0.83016100  | 3.65496600  | 0.13682400  |
| C | 3.47387900  | 4.24404600  | -0.54037000 |
| H | 3.99399100  | 2.56450200  | 0.69670900  |
| C | 1.10401200  | 4.70739800  | -0.72802900 |
| H | -0.20213200 | 3.44707600  | 0.40511800  |
| C | 2.43042800  | 5.01128500  | -1.07301300 |
| H | 4.50767100  | 4.45381300  | -0.78740400 |
| H | 0.30962100  | 5.31737800  | -1.14532000 |
| O | 2.59163800  | 6.05915300  | -1.92986400 |
| C | -1.47602800 | -1.45825000 | 1.12760300  |
| H | -0.59531500 | -2.06155200 | 0.93287600  |
| H | -1.52084500 | -1.31985000 | 2.20684400  |
| C | -2.75318600 | -2.08891900 | 0.57705800  |
| H | -2.73655300 | -3.17970900 | 0.59429900  |
| H | -3.62477400 | -1.74355000 | 1.15124600  |
| N | -2.80279200 | -1.60341700 | -0.81269100 |
| C | -1.98197700 | -0.39610300 | -1.01524700 |
| C | -0.77451200 | -0.64352700 | -1.98430300 |
| H | -2.59006200 | 0.42352500  | -1.40602200 |
| H | -0.60501800 | 0.26288600  | -2.56592600 |
| H | -1.05354700 | -1.42803000 | -2.68795600 |
| S | -4.21836800 | -1.76770500 | -1.68209100 |
| O | -4.71770900 | -3.11296900 | -1.39314000 |
| O | -3.91499500 | -1.29999100 | -3.03720200 |
| C | -5.33891400 | -0.58715000 | -0.93101400 |
| C | -6.07701600 | -0.96142700 | 0.19434900  |
| C | -5.36876600 | 0.73020100  | -1.40180000 |
| C | -6.82767900 | 0.00344500  | 0.86721300  |
| H | -6.07021500 | -1.99502700 | 0.52254500  |
| C | -6.12306200 | 1.67883500  | -0.71717300 |
| H | -4.82140300 | 0.99125900  | -2.30101800 |
| C | -6.85360400 | 1.33545200  | 0.43194600  |
| H | -7.40113400 | -0.28395100 | 1.74411700  |
| H | -6.14724500 | 2.70367400  | -1.07813800 |
| C | -7.65735900 | 2.38286900  | 1.16289800  |
| H | -8.04744600 | 2.00382500  | 2.11105900  |
| H | -7.04887500 | 3.26873700  | 1.37415900  |
| H | -8.51013500 | 2.71405500  | 0.55901500  |
| C | 3.91311000  | 6.42451000  | -2.30315100 |
| H | 4.42616500  | 5.60833600  | -2.82928500 |
| H | 3.81130700  | 7.27677700  | -2.97654400 |
| H | 4.51284400  | 6.72073100  | -1.43281700 |

|    |            |             |            |
|----|------------|-------------|------------|
| In | 3.49242100 | -1.84710300 | 0.54777500 |
| Cl | 4.95438400 | -0.00738800 | 1.03299000 |
| Cl | 4.82310200 | -3.69264700 | 0.04772400 |
| Cl | 2.03711300 | -1.71798000 | 2.43585400 |
| C  | 1.86521600 | 2.86486800  | 0.66165900 |
| C  | 1.60783400 | 1.72100500  | 1.62665100 |
| H  | 2.41517100 | 0.98965600  | 1.57616600 |
| H  | 1.60680400 | 2.07610500  | 2.66024500 |

InCl3

0 1

|    |             |             |            |
|----|-------------|-------------|------------|
| In | 0.00000000  | 0.00000000  | 0.00000000 |
| Cl | 0.00000000  | 2.28666400  | 0.00000000 |
| Cl | 1.98030900  | -1.14333200 | 0.00000000 |
| Cl | -1.98030900 | -1.14333200 | 0.00000000 |

int1-A

0 1

|    |             |             |             |
|----|-------------|-------------|-------------|
| Rh | -1.99855700 | -0.42467000 | -0.32823500 |
| O  | -0.53266900 | -0.56441200 | 1.22776000  |
| O  | -2.53405900 | -2.40163800 | -0.00333000 |
| O  | -2.05761900 | -0.04904700 | 2.82444300  |
| O  | -4.01403800 | -1.82889400 | 1.62400300  |
| C  | -0.90764000 | -0.42496300 | 2.43936900  |
| C  | 0.12077300  | -0.67947600 | 3.53462400  |
| C  | 0.84776100  | -2.03794400 | 3.48583300  |
| H  | 1.35371700  | -2.14630400 | 2.52430600  |
| H  | 1.63278800  | -2.01138500 | 4.25188800  |
| C  | -2.55884300 | -5.06578000 | 1.25085800  |
| H  | -2.92822100 | -6.09846900 | 1.23496900  |
| H  | -1.89938800 | -4.94916500 | 0.38484900  |
| C  | -3.76973500 | -4.13120600 | 1.07404800  |
| C  | -3.41220100 | -2.66645400 | 0.88091100  |
| Rh | -3.59405800 | 0.18350600  | 1.43633300  |
| O  | -5.03709500 | 0.29094500  | -0.04711700 |
| O  | -3.05752200 | 2.18831100  | 1.09554300  |
| O  | -3.52993700 | -0.24595000 | -1.66034300 |
| O  | -1.63829300 | 1.61678600  | -0.58096300 |
| C  | -4.69124000 | 0.08067600  | -1.25255300 |
| C  | -5.74611200 | 0.23207000  | -2.33604800 |
| C  | -6.65864900 | 1.46073600  | -2.17060300 |
| H  | -7.09189800 | 1.43813700  | -1.16408700 |
| H  | -7.49042500 | 1.36031700  | -2.87837500 |
| C  | -3.33394700 | 4.79369600  | -0.22031100 |

|   |             |             |             |
|---|-------------|-------------|-------------|
| H | -3.02560400 | 5.84620800  | -0.24054700 |
| H | -3.86566600 | 4.63489100  | 0.72480100  |
| C | -2.06235100 | 3.92823700  | -0.21052900 |
| C | -2.28647400 | 2.46013100  | 0.12582200  |
| H | -5.22845600 | 0.24016800  | -3.29918700 |
| H | -6.35650700 | -0.67939700 | -2.30202100 |
| H | -4.33008300 | -4.43487400 | 0.18091400  |
| H | -4.44710100 | -4.19892000 | 1.92997400  |
| H | 0.86501700  | 0.12383400  | 3.45060100  |
| H | -0.38744500 | -0.55339000 | 4.49462400  |
| H | -1.54150200 | 3.97881100  | -1.17090500 |
| H | -1.36529800 | 4.30876700  | 0.54634400  |
| C | -5.96971600 | 2.81940200  | -2.39739200 |
| H | -5.58031800 | 2.87044400  | -3.42412000 |
| H | -6.72955000 | 3.60905300  | -2.31522500 |
| C | -4.84045500 | 3.09368900  | -1.39762500 |
| H | -5.18932800 | 2.84662000  | -0.38965300 |
| H | -4.01746900 | 2.40404400  | -1.60914900 |
| C | -4.29058000 | 4.52324600  | -1.39606800 |
| H | -5.12327700 | 5.23725800  | -1.33486700 |
| H | -3.77710200 | 4.73102700  | -2.34634600 |
| C | -1.74044400 | -4.83938600 | 2.53395200  |
| H | -2.38837100 | -4.95140800 | 3.41500000  |
| H | -0.98366200 | -5.63300300 | 2.60409800  |
| C | -1.04453100 | -3.47457400 | 2.56231000  |
| H | -0.54011500 | -3.31582300 | 1.60283900  |
| H | -1.80552100 | -2.69586400 | 2.64337400  |
| C | -0.03391200 | -3.27952900 | 3.69614900  |
| H | 0.62629600  | -4.15576000 | 3.75241300  |
| H | -0.55270800 | -3.21864700 | 4.66325300  |
| C | -0.53937200 | -0.98825500 | -2.00208900 |
| C | -1.02647500 | -2.30612500 | -2.47640300 |
| O | -1.95537800 | -2.54327800 | -3.21539500 |
| C | -0.71907000 | 0.12355600  | -2.95290300 |
| O | -1.56171600 | 0.25582500  | -3.81119200 |
| O | -0.25138400 | -3.31341900 | -1.93709800 |
| O | 0.23868100  | 1.12495900  | -2.74979800 |
| C | -0.72010200 | -4.63671500 | -2.20723700 |
| H | -0.62939900 | -4.87649900 | -3.27173300 |
| H | -0.09220600 | -5.30057700 | -1.61071700 |
| H | -1.76897300 | -4.73498800 | -1.91818900 |
| C | -0.08321000 | 2.35309000  | -3.41311700 |
| H | 0.66641100  | 3.07761500  | -3.08706000 |
| H | -0.05307200 | 2.23767700  | -4.50010200 |

|   |             |             |             |
|---|-------------|-------------|-------------|
| H | -1.08072600 | 2.68601400  | -3.11908000 |
| C | 5.29402100  | 1.76996700  | -1.15641700 |
| C | 5.62795500  | 0.56434400  | -1.83838300 |
| C | 6.89748300  | -0.00467200 | -1.64142600 |
| C | 7.79731300  | 0.63130500  | -0.79452500 |
| C | 7.45021100  | 1.82858100  | -0.13405900 |
| C | 6.19778200  | 2.41032000  | -0.30152800 |
| C | 3.55175100  | 1.20214500  | -2.44810100 |
| C | 4.49819400  | 0.22323900  | -2.66195300 |
| H | 7.17681700  | -0.92182500 | -2.15376900 |
| H | 8.78457700  | 0.20602100  | -0.64026000 |
| H | 8.17550600  | 2.30665200  | 0.51792700  |
| H | 5.93150000  | 3.32480300  | 0.21707700  |
| H | 2.56043200  | 1.30649900  | -2.86740400 |
| N | 4.01761000  | 2.13431700  | -1.54378300 |
| C | 3.06495200  | 3.97978100  | 1.29059300  |
| C | 1.36571400  | 2.60614400  | 0.28689400  |
| C | 2.36018500  | 3.99515200  | 2.49016900  |
| H | 3.99749800  | 4.53510900  | 1.21971800  |
| C | 0.65650500  | 2.59259000  | 1.48969400  |
| H | 0.93185600  | 2.09315000  | -0.56737000 |
| C | 1.13467100  | 3.31506700  | 2.59336400  |
| H | 2.71788500  | 4.55124900  | 3.35051900  |
| H | -0.26929600 | 2.03962600  | 1.54421500  |
| O | 0.48586700  | 3.42819100  | 3.77890700  |
| C | 4.35951900  | -0.97754400 | -3.54631400 |
| H | 3.58865400  | -0.80703600 | -4.30503900 |
| H | 5.28752500  | -1.15869600 | -4.10191900 |
| C | 4.07208000  | -2.28798200 | -2.77507100 |
| H | 3.83869200  | -3.11426900 | -3.45230500 |
| H | 4.94643200  | -2.57736500 | -2.19465400 |
| N | 2.94861100  | -2.15252100 | -1.80761800 |
| C | 1.90860300  | -1.42472700 | -2.08471700 |
| C | 0.77477600  | -1.03478200 | -1.22599300 |
| H | 1.87900600  | -1.03305200 | -3.09950500 |
| H | 1.01203800  | -0.02468700 | -0.87344900 |
| H | 0.68466400  | -1.67615900 | -0.35924900 |
| S | 3.24265500  | -2.91200000 | -0.13218200 |
| O | 4.31085400  | -3.86493600 | -0.41471700 |
| O | 1.93944800  | -3.33733000 | 0.35102200  |
| C | 3.87828500  | -1.53626600 | 0.77981400  |
| C | 5.25787500  | -1.49643200 | 1.01360200  |
| C | 3.01472900  | -0.54919300 | 1.26854000  |
| C | 5.77234100  | -0.45225700 | 1.77065000  |

|   |             |             |             |
|---|-------------|-------------|-------------|
| H | 5.90359200  | -2.27025200 | 0.61657800  |
| C | 3.56283900  | 0.49393000  | 2.00677500  |
| H | 1.94402300  | -0.58837800 | 1.10700800  |
| C | 4.93809600  | 0.55631000  | 2.27394000  |
| H | 6.84112600  | -0.40428200 | 1.94850200  |
| H | 2.90808900  | 1.27436500  | 2.37520800  |
| C | 5.51018500  | 1.67811300  | 3.09977000  |
| H | 6.48751300  | 1.98311400  | 2.71554800  |
| H | 4.84615100  | 2.54535400  | 3.09994200  |
| H | 5.64625100  | 1.35904400  | 4.14022500  |
| C | -0.88006600 | 2.99877500  | 3.85260500  |
| H | -1.48549900 | 3.43622900  | 3.05086500  |
| H | -0.97660000 | 1.91207500  | 3.80043400  |
| H | -1.24416400 | 3.34745800  | 4.81976300  |
| C | 2.57672200  | 3.29647900  | 0.16748100  |
| C | 3.31275100  | 3.35830600  | -1.15500400 |
| H | 2.61154900  | 3.58179800  | -1.96395400 |
| H | 4.04619800  | 4.17108200  | -1.13943700 |

intl-B

0 1

|    |             |             |             |
|----|-------------|-------------|-------------|
| Rh | -2.00367000 | -0.05926300 | 0.43548800  |
| O  | -2.55079900 | 1.00825200  | -1.26944200 |
| O  | -3.42133100 | 0.94325000  | 1.55958000  |
| O  | -4.20197900 | -0.46214200 | -1.78876400 |
| O  | -5.09458000 | -0.46533900 | 0.95019100  |
| C  | -3.57166100 | 0.63126500  | -1.93192700 |
| C  | -4.08170200 | 1.57420600  | -3.01677600 |
| C  | -3.88927600 | 3.07062100  | -2.71265300 |
| H  | -2.87017400 | 3.21962500  | -2.33670600 |
| H  | -3.97464700 | 3.63129300  | -3.65154300 |
| C  | -5.35375400 | 2.95155400  | 2.16497500  |
| H  | -5.95151200 | 3.47096100  | 2.92391500  |
| H  | -4.29918500 | 3.11860600  | 2.40979100  |
| C  | -5.63189800 | 1.44187600  | 2.28084100  |
| C  | -4.63477200 | 0.56611700  | 1.53440800  |
| Rh | -3.78979800 | -1.64615700 | -0.12810400 |
| O  | -3.29708400 | -2.65314700 | 1.63024400  |
| O  | -2.36244200 | -2.73215800 | -1.20337200 |
| O  | -1.59882600 | -1.21855500 | 2.09758900  |
| O  | -0.71390000 | -1.26281400 | -0.68190600 |
| C  | -2.31670400 | -2.24815200 | 2.32517100  |
| C  | -1.93626100 | -3.06472200 | 3.55142400  |
| C  | -1.88739900 | -4.58363900 | 3.30599100  |

|   |             |             |             |
|---|-------------|-------------|-------------|
| H | -2.85059000 | -4.89447700 | 2.88596600  |
| H | -1.78691700 | -5.08095400 | 4.27830800  |
| C | -0.27393400 | -4.74379300 | -1.52479800 |
| H | 0.37277900  | -5.30877800 | -2.20900900 |
| H | -1.30375900 | -5.04256000 | -1.74956300 |
| C | -0.12430000 | -3.24722600 | -1.85327800 |
| C | -1.15590100 | -2.34513700 | -1.18965700 |
| H | -0.97579100 | -2.69078000 | 3.91855200  |
| H | -2.69045500 | -2.84865200 | 4.31886800  |
| H | -5.57711900 | 1.14230100  | 3.33546600  |
| H | -6.63473300 | 1.18526200  | 1.92637900  |
| H | -3.55128900 | 1.30562100  | -3.93877400 |
| H | -5.13445200 | 1.33240400  | -3.19122200 |
| H | 0.86885000  | -2.87550600 | -1.58933000 |
| H | -0.25088800 | -3.11144200 | -2.93461200 |
| C | -0.75293400 | -5.05726900 | 2.37870200  |
| H | 0.22003900  | -4.78577300 | 2.81374800  |
| H | -0.77725200 | -6.15514100 | 2.34107200  |
| C | -0.86464100 | -4.49692800 | 0.95568200  |
| H | -1.89956200 | -4.59582300 | 0.61346800  |
| H | -0.65807400 | -3.42318600 | 0.98546800  |
| C | 0.06527000  | -5.14099900 | -0.07647400 |
| H | -0.00136700 | -6.23482300 | 0.00172100  |
| H | 1.10813400  | -4.87777800 | 0.14870600  |
| C | -5.65968800 | 3.56178500  | 0.78321200  |
| H | -6.73743000 | 3.49587900  | 0.57660300  |
| H | -5.42190100 | 4.63435900  | 0.82179500  |
| C | -4.86608900 | 2.90502800  | -0.35177900 |
| H | -3.82977600 | 2.78537100  | -0.03351700 |
| H | -5.24849200 | 1.88877700  | -0.50208200 |
| C | -4.89553100 | 3.64123700  | -1.69448300 |
| H | -4.66323800 | 4.70393400  | -1.53670600 |
| H | -5.90870500 | 3.61024300  | -2.12000000 |
| C | -0.30024500 | 1.40754500  | 0.94968300  |
| C | -0.74406300 | 2.74483200  | 0.49056000  |
| O | -0.29114100 | 3.29155500  | -0.51433300 |
| C | -0.09773300 | 1.12785800  | 2.39127800  |
| O | 0.87646200  | 0.50524100  | 2.82079500  |
| O | -1.68073100 | 3.34557100  | 1.25286100  |
| O | -1.06630100 | 1.57541400  | 3.20461700  |
| C | -2.05580900 | 4.66205600  | 0.82760600  |
| H | -2.44154800 | 4.65047800  | -0.19444800 |
| H | -2.83380500 | 4.97965600  | 1.52195100  |
| H | -1.20053400 | 5.34340400  | 0.87051900  |

|   |             |             |             |
|---|-------------|-------------|-------------|
| C | -0.99861200 | 1.10509100  | 4.55539000  |
| H | -1.83674100 | 1.57667600  | 5.06915500  |
| H | -1.10205900 | 0.01684900  | 4.57313500  |
| H | -0.05183400 | 1.38347000  | 5.02695900  |
| C | 6.39933600  | 0.16676100  | 1.97769600  |
| C | 6.20310000  | 1.56767500  | 1.83695900  |
| C | 7.30489800  | 2.38821200  | 1.54319100  |
| C | 8.55505300  | 1.80332100  | 1.38305700  |
| C | 8.72602900  | 0.40914100  | 1.50949800  |
| C | 7.65462800  | -0.42659100 | 1.80602600  |
| C | 4.21570200  | 0.59896400  | 2.29788200  |
| C | 4.79818000  | 1.81839700  | 2.04230800  |
| H | 7.18123500  | 3.46305400  | 1.43864700  |
| H | 9.41476700  | 2.42509200  | 1.15193700  |
| H | 9.71320900  | -0.02117200 | 1.37015800  |
| H | 7.79017400  | -1.50006500 | 1.89200400  |
| H | 3.18362900  | 0.34841400  | 2.51258900  |
| N | 5.16901600  | -0.40521500 | 2.27509800  |
| C | 4.90751800  | -1.26634000 | -0.45598800 |
| C | 3.77225100  | -3.25875100 | 0.25857000  |
| C | 4.63029700  | -1.58034200 | -1.77992500 |
| H | 5.45800200  | -0.35694800 | -0.24626800 |
| C | 3.47539400  | -3.58268700 | -1.06936200 |
| H | 3.42500300  | -3.92303400 | 1.04695600  |
| C | 3.89682000  | -2.73065600 | -2.09668800 |
| H | 4.97709300  | -0.93652600 | -2.58129500 |
| H | 2.90763300  | -4.47949100 | -1.28372500 |
| O | 3.62331000  | -2.91069300 | -3.42538100 |
| C | 4.11997500  | 3.14726400  | 1.88017200  |
| H | 3.22840300  | 3.22991200  | 2.51015600  |
| H | 4.78547400  | 3.95359800  | 2.21076500  |
| C | 3.79128900  | 3.48130700  | 0.40897500  |
| H | 3.36974500  | 4.48435000  | 0.30688600  |
| H | 4.71114300  | 3.42949400  | -0.17744300 |
| N | 2.82406500  | 2.54448700  | -0.24584600 |
| C | 2.00940800  | 1.81706300  | 0.44819800  |
| C | 0.89042200  | 0.91444600  | 0.10455900  |
| H | 2.12092500  | 1.93186600  | 1.51894200  |
| H | 1.16177100  | -0.09155600 | 0.43603400  |
| H | 0.63409600  | 0.87572300  | -0.94262000 |
| S | 3.09108100  | 2.58498800  | -2.08166100 |
| O | 4.36835300  | 1.88569600  | -2.20593100 |
| O | 2.95906200  | 4.00774600  | -2.36980700 |
| C | 1.80791500  | 1.65614500  | -2.83841900 |

|   |             |             |             |
|---|-------------|-------------|-------------|
| C | 2.04680600  | 0.30792700  | -3.12130800 |
| C | 0.58237100  | 2.27288900  | -3.11097400 |
| C | 1.01450800  | -0.44539200 | -3.66216500 |
| H | 3.00534100  | -0.13975900 | -2.90577500 |
| C | -0.43239900 | 1.49084900  | -3.64668700 |
| H | 0.42012600  | 3.31307700  | -2.86498200 |
| C | -0.24528900 | 0.12301600  | -3.90516500 |
| H | 1.19705700  | -1.49121100 | -3.88198500 |
| H | -1.39438800 | 1.94808600  | -3.84175700 |
| C | -1.38722800 | -0.72553800 | -4.39974000 |
| H | -2.01547500 | -0.17991400 | -5.10981800 |
| H | -1.03003400 | -1.63511000 | -4.89027400 |
| H | -2.02716900 | -1.02856300 | -3.56238100 |
| C | 3.03068800  | -4.13806900 | -3.82999800 |
| H | 3.63583100  | -4.99897600 | -3.51807400 |
| H | 2.01599000  | -4.25063100 | -3.43026600 |
| H | 2.98472300  | -4.10552700 | -4.91974000 |
| C | 4.48836600  | -2.10521800 | 0.58740900  |
| C | 4.82410500  | -1.80032300 | 2.04400800  |
| H | 3.97361600  | -2.05011400 | 2.68679000  |
| H | 5.66368000  | -2.41746200 | 2.38339100  |

int1-C

0 1

|    |             |             |             |
|----|-------------|-------------|-------------|
| Rh | 1.96033900  | 0.13958200  | -0.23863900 |
| O  | 1.15187400  | 0.91677700  | 1.54417900  |
| O  | 2.37784800  | 2.07835400  | -0.89516300 |
| O  | 3.17468100  | 0.92571800  | 2.56947900  |
| O  | 4.35889100  | 2.12245100  | 0.21482100  |
| C  | 1.93272000  | 1.17408600  | 2.51977300  |
| C  | 1.31723900  | 1.83044800  | 3.74749500  |
| C  | 0.28460100  | 2.92752900  | 3.43929600  |
| H  | -0.47453400 | 2.50583700  | 2.77237800  |
| H  | -0.23098900 | 3.18182200  | 4.37303500  |
| C  | 2.43770200  | 5.01254500  | -0.68954700 |
| H  | 2.64922200  | 5.97251100  | -1.17641100 |
| H  | 1.56588000  | 4.58070900  | -1.19487600 |
| C  | 3.65258600  | 4.09280100  | -0.92114200 |
| C  | 3.44704100  | 2.64492800  | -0.49910400 |
| Rh | 4.12678000  | 0.17659700  | 0.88682300  |
| O  | 4.96707700  | -0.52111300 | -0.87868100 |
| O  | 3.72959600  | -1.78150000 | 1.49362100  |
| O  | 2.93143200  | -0.61655400 | -1.87722700 |
| O  | 1.70459900  | -1.78290100 | 0.47047000  |



|   |             |             |             |
|---|-------------|-------------|-------------|
| C | 4.19193900  | -0.79066800 | -1.84934300 |
| C | 4.80329200  | -1.38562100 | -3.10715300 |
| C | 5.79053800  | -2.53881100 | -2.84857000 |
| H | 6.55440500  | -2.18894500 | -2.14462900 |
| H | 6.30372300  | -2.76029100 | -3.79224400 |
| C | 3.69235000  | -4.70034600 | 1.25553000  |
| H | 3.48856300  | -5.66756000 | 1.73131700  |
| H | 4.53282400  | -4.25132400 | 1.79693600  |
| C | 2.45369300  | -3.81000900 | 1.45161300  |
| C | 2.65639200  | -2.34188100 | 1.11461700  |
| H | 3.98111800  | -1.69917600 | -3.75631600 |
| H | 5.33079100  | -0.56739600 | -3.61376200 |
| H | 3.88661700  | 4.07432200  | -1.99318100 |
| H | 4.53568600  | 4.47157600  | -0.39928000 |
| H | 0.83050200  | 1.03159300  | 4.32137300  |
| H | 2.13618800  | 2.21314100  | 4.36323900  |
| H | 1.60729900  | -4.16694100 | 0.85766900  |
| H | 2.13284300  | -3.84169000 | 2.49804000  |
| C | 5.15381600  | -3.83213100 | -2.30665600 |
| H | 4.41997700  | -4.21540100 | -3.03018000 |
| H | 5.94005300  | -4.59604800 | -2.23132400 |
| C | 4.49160900  | -3.64631300 | -0.93644400 |
| H | 5.16263700  | -3.06887600 | -0.29237500 |
| H | 3.59569500  | -3.03121000 | -1.06370500 |
| C | 4.09860400  | -4.93692300 | -0.21054100 |
| H | 4.94471700  | -5.63761600 | -0.22635400 |
| H | 3.27725200  | -5.43580700 | -0.74625200 |
| C | 2.08032600  | 5.26197700  | 0.78731100  |
| H | 2.94211200  | 5.69409300  | 1.31442700  |
| H | 1.29405800  | 6.02961100  | 0.82785300  |
| C | 1.60766700  | 3.99019500  | 1.50444700  |
| H | 0.97238100  | 3.41187900  | 0.82627500  |
| H | 2.48376400  | 3.36280500  | 1.68805500  |
| C | 0.87345400  | 4.21494100  | 2.83094700  |
| H | 0.05170700  | 4.92837100  | 2.67749500  |
| H | 1.55418200  | 4.68310100  | 3.55586100  |
| C | -0.12176500 | -0.04073700 | -1.32817500 |
| C | -0.17306900 | 1.27763300  | -1.98726700 |
| O | -0.77180000 | 2.24379900  | -1.51545000 |
| C | 0.04664800  | -1.27252700 | -2.14255300 |
| O | 0.54278800  | -1.39403200 | -3.24186900 |
| O | 0.52142800  | 1.35100700  | -3.13448100 |
| O | -0.46591100 | -2.35663400 | -1.46064200 |
| C | 0.66766900  | 2.66339100  | -3.68424600 |

|   |             |             |             |
|---|-------------|-------------|-------------|
| H | 1.28992400  | 3.27085700  | -3.02295300 |
| H | 1.16095800  | 2.52232100  | -4.64644000 |
| H | -0.30256100 | 3.15111800  | -3.81682000 |
| C | -0.08690700 | -3.63562500 | -1.97357300 |
| H | -0.56809100 | -4.36399200 | -1.31875000 |
| H | -0.41402700 | -3.76285000 | -3.00989500 |
| H | 1.00068600  | -3.74809800 | -1.93047600 |
| C | -6.17475500 | -2.74890300 | -0.31171400 |
| C | -6.20274200 | -1.52830500 | -1.04281800 |
| C | -7.26812500 | -0.63438400 | -0.84331200 |
| C | -8.25626000 | -0.95800400 | 0.07673900  |
| C | -8.20266300 | -2.16511600 | 0.80308000  |
| C | -7.16786700 | -3.07532700 | 0.61903800  |
| C | -4.35845200 | -2.68576000 | -1.62728200 |
| C | -5.02311500 | -1.50983500 | -1.87166600 |
| H | -7.32047500 | 0.29746200  | -1.39888000 |
| H | -9.08076100 | -0.27206100 | 0.24539300  |
| H | -8.98504800 | -2.38946700 | 1.52187100  |
| H | -7.13630500 | -4.00224100 | 1.18255300  |
| H | -3.40905100 | -3.03220200 | -2.01401600 |
| N | -5.04597700 | -3.45446600 | -0.70712500 |
| C | -2.20495000 | -4.96345500 | 1.17689200  |
| C | -3.22591200 | -2.80290400 | 1.44020800  |
| C | -1.13950600 | -4.56403600 | 1.97449300  |
| H | -2.20907700 | -5.96860500 | 0.76034400  |
| C | -2.15991800 | -2.38226900 | 2.23836500  |
| H | -4.03255700 | -2.10430500 | 1.23708600  |
| C | -1.10491900 | -3.26488800 | 2.50375500  |
| H | -0.31324300 | -5.23291800 | 2.18908800  |
| H | -2.15866100 | -1.36845600 | 2.62060900  |
| O | -0.01379600 | -2.95945900 | 3.25699500  |
| C | -4.53235800 | -0.37755200 | -2.71918200 |
| H | -3.64940700 | -0.68036400 | -3.29248200 |
| H | -5.28241800 | -0.07315000 | -3.46044800 |
| C | -4.23329300 | 0.89844300  | -1.90225900 |
| H | -3.78827400 | 1.66926900  | -2.53903100 |
| H | -5.16220700 | 1.27715800  | -1.48039600 |
| N | -3.29251800 | 0.70884900  | -0.76639200 |
| C | -2.32998300 | -0.18482500 | -0.78715600 |
| C | -1.03035900 | -0.17237500 | -0.09234000 |
| H | -2.43898700 | -0.95670700 | -1.53657000 |
| H | -0.82928100 | -1.11928500 | 0.40200400  |
| H | -0.90430900 | 0.64842200  | 0.59908300  |
| S | -3.67742100 | 1.67670800  | 0.72076500  |

|   |             |             |             |
|---|-------------|-------------|-------------|
| O | -2.79288300 | 1.16973200  | 1.76425700  |
| O | -5.12909300 | 1.54382100  | 0.81382000  |
| C | -3.26949700 | 3.34209900  | 0.28764500  |
| C | -1.95862300 | 3.78884900  | 0.45206900  |
| C | -4.28085700 | 4.17451300  | -0.20275800 |
| C | -1.65976700 | 5.10071200  | 0.10597100  |
| H | -1.18979100 | 3.12380600  | 0.81585700  |
| C | -3.95564800 | 5.48481300  | -0.53992600 |
| H | -5.29689100 | 3.80665300  | -0.29070500 |
| C | -2.64383100 | 5.96342100  | -0.39708100 |
| H | -0.64103300 | 5.45277600  | 0.21893900  |
| H | -4.73132900 | 6.14742900  | -0.91303400 |
| C | -2.28653800 | 7.37170600  | -0.80135200 |
| H | -3.15273800 | 8.03771900  | -0.75647000 |
| H | -1.50135400 | 7.78296100  | -0.16036400 |
| H | -1.90867600 | 7.38960800  | -1.83094100 |
| C | 0.20567600  | -1.59170400 | 3.59437900  |
| H | 0.19124700  | -0.95627500 | 2.70487600  |
| H | -0.53595000 | -1.23491300 | 4.32105300  |
| H | 1.19962100  | -1.55125900 | 4.04384700  |
| C | -3.26424900 | -4.08968000 | 0.89619500  |
| C | -4.42049000 | -4.54933000 | 0.02249600  |
| H | -4.07050300 | -5.29686600 | -0.69883700 |
| H | -5.19896500 | -5.03713300 | 0.61772000  |

int2

0 1

|   |             |             |             |
|---|-------------|-------------|-------------|
| C | -1.18667500 | -0.28424800 | 0.85406400  |
| C | -1.78303400 | -1.46718700 | 0.35632400  |
| O | -2.99779700 | -1.76936100 | 0.38350200  |
| C | -2.03119700 | 0.68483700  | 1.45314100  |
| O | -3.28757300 | 0.62341600  | 1.52412500  |
| O | -0.91082800 | -2.36124300 | -0.19471600 |
| O | -1.41344000 | 1.77256300  | 1.94945000  |
| C | -1.53562700 | -3.47833900 | -0.86770800 |
| H | -2.25839700 | -3.11831200 | -1.60335900 |
| H | -0.71830000 | -4.01789700 | -1.34952500 |
| H | -2.04866900 | -4.12211400 | -0.15011300 |
| C | -2.28346000 | 2.80995400  | 2.45390600  |
| H | -1.62031500 | 3.63725500  | 2.70681600  |
| H | -3.01417700 | 3.10001700  | 1.69553000  |
| H | -2.81532700 | 2.46105000  | 3.34180100  |
| C | 4.42260500  | -1.72903800 | -1.29906800 |
| C | 4.55139000  | -2.10434600 | 0.07089700  |

|   |             |             |             |
|---|-------------|-------------|-------------|
| C | 5.75302800  | -1.83449300 | 0.74973300  |
| C | 6.77810600  | -1.18413100 | 0.07197600  |
| C | 6.62678300  | -0.80680300 | -1.27979100 |
| C | 5.45566500  | -1.07547100 | -1.98183200 |
| C | 2.50350900  | -2.69186400 | -0.66363000 |
| C | 3.30789700  | -2.71567100 | 0.45590200  |
| H | 5.88053500  | -2.12911500 | 1.78780500  |
| H | 7.71027100  | -0.96692000 | 0.58400100  |
| H | 7.44582200  | -0.30475400 | -1.78609100 |
| H | 5.35349500  | -0.78515600 | -3.02247100 |
| H | 1.47971300  | -3.01843500 | -0.78072900 |
| N | 3.16784800  | -2.12302100 | -1.72772500 |
| C | 0.18025900  | -0.85767400 | -2.86140600 |
| C | 2.03085600  | 0.67459900  | -2.74708500 |
| C | -0.72730100 | 0.18572800  | -2.65793200 |
| H | -0.20951700 | -1.86522600 | -2.97830000 |
| C | 1.14542200  | 1.72526400  | -2.55936200 |
| H | 3.10032700  | 0.87036200  | -2.75573800 |
| C | -0.24051500 | 1.49115200  | -2.49469900 |
| H | -1.78829300 | -0.03170700 | -2.61537100 |
| H | 1.49241800  | 2.74441800  | -2.44147300 |
| O | -1.00687000 | 2.58154300  | -2.26251800 |
| C | 2.90961400  | -3.14729900 | 1.83326100  |
| H | 1.96888000  | -3.70648200 | 1.79951600  |
| H | 3.64893600  | -3.82914600 | 2.27060000  |
| C | 2.80020000  | -1.96401600 | 2.83172500  |
| H | 2.31631900  | -2.27062000 | 3.76316500  |
| H | 3.79072100  | -1.58754500 | 3.08166500  |
| N | 2.05020000  | -0.80339700 | 2.27617800  |
| C | 1.07302300  | -0.98008700 | 1.44205100  |
| C | 0.28723300  | 0.00247300  | 0.66117200  |
| H | 0.77548900  | -2.01049300 | 1.27844000  |
| H | 0.58351100  | -0.15811400 | -0.38520100 |
| H | 0.50475300  | 1.03178600  | 0.91592600  |
| S | 2.59546400  | 0.88496700  | 2.85010400  |
| O | 3.78818000  | 0.55771600  | 3.62253400  |
| O | 1.39353900  | 1.45374400  | 3.43890100  |
| C | 3.04090500  | 1.76099600  | 1.37591200  |
| C | 4.19116100  | 1.38736300  | 0.67696400  |
| C | 2.27037300  | 2.86867400  | 1.00769400  |
| C | 4.55725400  | 2.13815400  | -0.43499800 |
| H | 4.78962400  | 0.53898700  | 0.98582900  |
| C | 2.66932200  | 3.60932700  | -0.09950400 |
| H | 1.38333900  | 3.13343000  | 1.57290200  |

|    |             |             |             |
|----|-------------|-------------|-------------|
| C  | 3.80738900  | 3.25314500  | -0.84002100 |
| H  | 5.43970700  | 1.84341200  | -0.99324100 |
| H  | 2.07962800  | 4.47010600  | -0.39979100 |
| C  | 4.19187900  | 4.02185700  | -2.07765500 |
| H  | 5.27634300  | 4.04122900  | -2.21700000 |
| H  | 3.75596100  | 3.54929700  | -2.96701700 |
| H  | 3.82760100  | 5.05179400  | -2.04341100 |
| C  | -2.39832900 | 2.38129500  | -1.97515900 |
| H  | -2.52288000 | 1.75080600  | -1.09186800 |
| H  | -2.81321000 | 3.36661600  | -1.76913700 |
| H  | -2.93407100 | 1.92150100  | -2.81046300 |
| In | -4.63285500 | -0.30893500 | 0.11176500  |
| Cl | -4.23275500 | -0.84820600 | -2.22121500 |
| Cl | -5.40693800 | 1.93832400  | -0.25815600 |
| Cl | -6.21371800 | -1.56899400 | 1.27828600  |
| C  | 1.56066400  | -0.64023400 | -2.89759400 |
| C  | 2.52830800  | -1.79619400 | -3.01102000 |
| H  | 2.01348900  | -2.69443300 | -3.36561100 |
| H  | 3.32846300  | -1.58481400 | -3.72472000 |

Rh-cry

0 1

|    |             |            |             |
|----|-------------|------------|-------------|
| Rh | 1.72120000  | 5.38290000 | 10.43060000 |
| O  | 3.17610000  | 4.54640000 | 9.27030000  |
| O  | 0.71800000  | 6.06800000 | 8.78150000  |
| O  | 2.02620000  | 2.62190000 | 9.03870000  |
| O  | -0.40130000 | 4.12290000 | 8.56900000  |
| O  | 2.91220000  | 7.30510000 | 10.87270000 |
| C  | 3.02570000  | 3.36470000 | 8.82830000  |
| C  | 4.18270000  | 2.81040000 | 7.99790000  |
| C  | 5.44370000  | 2.84910000 | 8.87160000  |
| H  | 5.61930000  | 3.75390000 | 9.14090000  |
| H  | 6.19090000  | 2.51480000 | 8.36930000  |
| H  | 5.31120000  | 2.30300000 | 9.64940000  |
| C  | 3.90210000  | 1.37620000 | 7.54710000  |
| H  | 3.78490000  | 0.81570000 | 8.31770000  |
| H  | 4.64100000  | 1.05480000 | 7.02610000  |
| H  | 3.10290000  | 1.35900000 | 7.01480000  |
| C  | 4.40380000  | 3.73870000 | 6.76510000  |
| H  | 4.72320000  | 4.59790000 | 7.08080000  |
| H  | 5.10140000  | 3.35320000 | 6.21120000  |
| C  | 3.18240000  | 3.96870000 | 5.90580000  |
| C  | 2.90740000  | 3.17330000 | 4.79580000  |
| H  | 3.50820000  | 2.51200000 | 4.53690000  |

|    |              |             |              |
|----|--------------|-------------|--------------|
| C  | 1. 74420000  | 3. 36760000 | 4. 08200000  |
| H  | 1. 55130000  | 2. 81660000 | 3. 35780000  |
| C  | 0. 85210000  | 4. 38240000 | 4. 43270000  |
| H  | 0. 07180000  | 4. 50360000 | 3. 94170000  |
| C  | 1. 12250000  | 5. 20110000 | 5. 49940000  |
| C  | 2. 29840000  | 4. 98860000 | 6. 22150000  |
| H  | 2. 49420000  | 5. 54840000 | 6. 93740000  |
| C  | 0. 17990000  | 6. 31130000 | 5. 93260000  |
| H  | -0. 29090000 | 6. 64350000 | 5. 15170000  |
| H  | 0. 70340000  | 7. 04180000 | 6. 29470000  |
| C  | -0. 86300000 | 5. 86870000 | 6. 99310000  |
| C  | -1. 80960000 | 4. 83340000 | 6. 41540000  |
| H  | -1. 30880000 | 4. 06570000 | 6. 13070000  |
| H  | -2. 27490000 | 5. 20810000 | 5. 66340000  |
| H  | -2. 44430000 | 4. 57080000 | 7. 08600000  |
| C  | -1. 65740000 | 7. 10280000 | 7. 44910000  |
| H  | -2. 27720000 | 6. 84850000 | 8. 13710000  |
| H  | -2. 13960000 | 7. 46690000 | 6. 70320000  |
| H  | -1. 05260000 | 7. 76350000 | 7. 79360000  |
| C  | -0. 12380000 | 5. 30000000 | 8. 21140000  |
| C  | 3. 80130000  | 7. 88330000 | 10. 30240000 |
| C  | 4. 14200000  | 7. 57490000 | 8. 88500000  |
| H  | 4. 46430000  | 6. 67330000 | 8. 82210000  |
| H  | 4. 82300000  | 8. 18050000 | 8. 58070000  |
| H  | 3. 35890000  | 7. 67350000 | 8. 33830000  |
| C  | 4. 59770000  | 8. 93990000 | 10. 98430000 |
| H  | 4. 28660000  | 9. 04280000 | 11. 88700000 |
| H  | 4. 49600000  | 9. 77000000 | 10. 51390000 |
| H  | 5. 52370000  | 8. 68680000 | 10. 99150000 |
| Rh | 0. 51590000  | 3. 34170000 | 10. 20110000 |
| O  | -0. 93900000 | 4. 17820000 | 11. 36140000 |
| O  | 1. 51910000  | 2. 65660000 | 11. 85020000 |
| O  | 0. 21080000  | 6. 10270000 | 11. 59300000 |
| O  | 2. 63830000  | 4. 60170000 | 12. 06270000 |
| O  | -0. 67510000 | 1. 41950000 | 9. 75900000  |
| C  | -0. 78870000 | 5. 35990000 | 11. 80340000 |
| C  | -1. 94560000 | 5. 91420000 | 12. 63380000 |
| C  | -3. 20660000 | 5. 87550000 | 11. 76010000 |
| H  | -3. 38220000 | 4. 97070000 | 11. 49080000 |
| H  | -3. 95380000 | 6. 20980000 | 12. 26250000 |
| H  | -3. 07420000 | 6. 42160000 | 10. 98230000 |
| C  | -1. 66500000 | 7. 34840000 | 13. 08460000 |
| H  | -1. 54780000 | 7. 90890000 | 12. 31400000 |
| H  | -2. 40390000 | 7. 66980000 | 13. 60560000 |

|   |             |             |             |
|---|-------------|-------------|-------------|
| H | -0.86590000 | 7.36560000  | 13.61690000 |
| C | -2.16670000 | 4.98590000  | 13.86660000 |
| H | -2.48610000 | 4.12670000  | 13.55090000 |
| H | -2.86440000 | 5.37140000  | 14.42050000 |
| C | -0.94540000 | 4.75590000  | 14.72590000 |
| C | -0.67030000 | 5.55130000  | 15.83590000 |
| H | -1.27120000 | 6.21260000  | 16.09480000 |
| C | 0.49290000  | 5.35700000  | 16.54970000 |
| H | 0.68580000  | 5.90800000  | 17.27390000 |
| C | 1.38500000  | 4.34220000  | 16.19900000 |
| H | 2.16520000  | 4.22100000  | 16.69000000 |
| C | 1.11460000  | 3.52350000  | 15.13230000 |
| C | -0.06130000 | 3.73600000  | 14.41020000 |
| H | -0.25710000 | 3.17620000  | 13.69430000 |
| C | 2.05720000  | 2.41330000  | 14.69910000 |
| H | 2.52790000  | 2.08110000  | 15.48000000 |
| H | 1.53370000  | 1.68280000  | 14.33700000 |
| C | 3.10000000  | 2.85590000  | 13.63860000 |
| C | 4.04670000  | 3.89120000  | 14.21630000 |
| H | 3.54580000  | 4.65890000  | 14.50100000 |
| H | 4.51190000  | 3.51650000  | 14.96830000 |
| H | 4.68130000  | 4.15380000  | 13.54570000 |
| C | 3.89440000  | 1.62180000  | 13.18260000 |
| H | 4.51420000  | 1.87610000  | 12.49460000 |
| H | 4.37660000  | 1.25770000  | 13.92850000 |
| H | 3.28960000  | 0.96110000  | 12.83810000 |
| C | 2.36080000  | 3.42460000  | 12.42030000 |
| C | -1.56430000 | 0.84130000  | 10.32930000 |
| C | -1.90500000 | 1.14970000  | 11.74670000 |
| H | -2.22730000 | 2.05130000  | 11.80960000 |
| H | -2.58600000 | 0.54410000  | 12.05100000 |
| H | -1.12190000 | 1.05110000  | 12.29340000 |
| C | -2.36060000 | -0.21530000 | 9.64740000  |
| H | -2.04960000 | -0.31820000 | 8.74470000  |
| H | -2.25900000 | -1.04540000 | 10.11780000 |
| H | -3.28670000 | 0.03780000  | 9.64020000  |

Rh-rea

O 1

|    |             |             |             |
|----|-------------|-------------|-------------|
| Rh | -0.03174000 | 0.00000000  | 1.19416400  |
| O  | 1.40804300  | -1.47999600 | 1.15997400  |
| O  | 1.40804300  | 1.47999600  | 1.15997400  |
| O  | 1.47665300  | -1.45915700 | -1.10283500 |
| O  | 1.47665300  | 1.45915700  | -1.10283500 |

|    |              |              |              |
|----|--------------|--------------|--------------|
| C  | 1. 84998700  | -1. 88781700 | 0. 03421000  |
| C  | 2. 90664800  | -2. 99787700 | 0. 07400700  |
| C  | 2. 24959800  | -4. 23308700 | 0. 72877900  |
| H  | 1. 87933400  | -3. 99487800 | 1. 72891600  |
| H  | 2. 97945600  | -5. 04567200 | 0. 80668300  |
| H  | 1. 40855400  | -4. 59124700 | 0. 12498300  |
| C  | 3. 38451900  | -3. 34376900 | -1. 34285800 |
| H  | 2. 55121400  | -3. 68861400 | -1. 95979600 |
| H  | 4. 13360200  | -4. 14141500 | -1. 29238100 |
| H  | 3. 82963800  | -2. 47749800 | -1. 83548100 |
| C  | 4. 09339300  | -2. 51999700 | 0. 97174200  |
| H  | 3. 71854000  | -2. 40972400 | 1. 99356200  |
| H  | 4. 83544300  | -3. 32709600 | 0. 98077800  |
| C  | 4. 73568400  | -1. 22401800 | 0. 52516300  |
| C  | 5. 81551000  | -1. 21014000 | -0. 36740400 |
| H  | 6. 23582600  | -2. 14984900 | -0. 71610900 |
| C  | 6. 35493700  | 0. 00000000  | -0. 80536700 |
| H  | 7. 19844700  | 0. 00000000  | -1. 49016400 |
| C  | 5. 81551000  | 1. 21014000  | -0. 36740400 |
| H  | 6. 23582600  | 2. 14984900  | -0. 71610900 |
| C  | 4. 73568400  | 1. 22401800  | 0. 52516300  |
| C  | 4. 22404500  | 0. 00000000  | 0. 97391600  |
| H  | 3. 39342100  | 0. 00000000  | 1. 67128800  |
| C  | 4. 09339300  | 2. 51999700  | 0. 97174200  |
| H  | 4. 83544300  | 3. 32709600  | 0. 98077800  |
| H  | 3. 71854000  | 2. 40972400  | 1. 99356200  |
| C  | 2. 90664800  | 2. 99787700  | 0. 07400700  |
| C  | 3. 38451900  | 3. 34376900  | -1. 34285800 |
| H  | 3. 82963800  | 2. 47749800  | -1. 83548100 |
| H  | 4. 13360200  | 4. 14141500  | -1. 29238100 |
| H  | 2. 55121400  | 3. 68861500  | -1. 95979600 |
| C  | 2. 24959800  | 4. 23308700  | 0. 72877900  |
| H  | 1. 40855400  | 4. 59124700  | 0. 12498300  |
| H  | 2. 97945600  | 5. 04567200  | 0. 80668300  |
| H  | 1. 87933400  | 3. 99487800  | 1. 72891600  |
| C  | 1. 84998700  | 1. 88781700  | 0. 03421000  |
| Rh | 0. 03174500  | 0. 00000000  | -1. 19415400 |
| O  | -1. 40803900 | 1. 47999500  | -1. 15996500 |
| O  | -1. 40803900 | -1. 47999500 | -1. 15996500 |
| O  | -1. 47665000 | 1. 45915600  | 1. 10284300  |
| O  | -1. 47665000 | -1. 45915600 | 1. 10284300  |
| C  | -1. 84998600 | 1. 88781500  | -0. 03420100 |
| C  | -2. 90664900 | 2. 99787100  | -0. 07399900 |
| C  | -2. 24959400 | 4. 23308800  | -0. 72875300 |



|   |             |             |             |
|---|-------------|-------------|-------------|
| H | -1.87932000 | 3.99489000  | -1.72888900 |
| H | -2.97945100 | 5.04567400  | -0.80665500 |
| H | -1.40855600 | 4.59124300  | -0.12494500 |
| C | -3.38453500 | 3.34375000  | 1.34286300  |
| H | -2.55123900 | 3.68859300  | 1.95981400  |
| H | -4.13362100 | 4.14139400  | 1.29238600  |
| H | -3.82965800 | 2.47747300  | 1.83547500  |
| C | -4.09338300 | 2.51999700  | -0.97175100 |
| H | -3.71851700 | 2.40972800  | -1.99356700 |
| H | -4.83543200 | 3.32709800  | -0.98079400 |
| C | -4.73568200 | 1.22401800  | -0.52518600 |
| C | -5.81552400 | 1.21014000  | 0.36736200  |
| H | -6.23584600 | 2.14984900  | 0.71606000  |
| C | -6.35495900 | 0.00000000  | 0.80531600  |
| H | -7.19848200 | 0.00000000  | 1.49009800  |
| C | -5.81552400 | -1.21014000 | 0.36736200  |
| H | -6.23584600 | -2.14984900 | 0.71606000  |
| C | -4.73568200 | -1.22401800 | -0.52518600 |
| C | -4.22403600 | 0.00000000  | -0.97393000 |
| H | -3.39340000 | 0.00000000  | -1.67128800 |
| C | -4.09338300 | -2.51999700 | -0.97175200 |
| H | -4.83543200 | -3.32709800 | -0.98079400 |
| H | -3.71851600 | -2.40972900 | -1.99356700 |
| C | -2.90664900 | -2.99787100 | -0.07399900 |
| C | -3.38453500 | -3.34375000 | 1.34286300  |
| H | -3.82965800 | -2.47747300 | 1.83547500  |
| H | -4.13362100 | -4.14139400 | 1.29238600  |
| H | -2.55123900 | -3.68859300 | 1.95981400  |
| C | -2.24959400 | -4.23308800 | -0.72875300 |
| H | -1.40855500 | -4.59124300 | -0.12494500 |
| H | -2.97945100 | -5.04567400 | -0.80665500 |
| H | -1.87932000 | -3.99489000 | -1.72888900 |
| C | -1.84998600 | -1.88781500 | -0.03420100 |

Rh-sim

0 1

|    |            |             |             |
|----|------------|-------------|-------------|
| Rh | 0.17397700 | 0.00000700  | 1.18333500  |
| O  | 1.59803100 | -1.47772800 | 0.89801800  |
| O  | 1.59804600 | 1.47772200  | 0.89801700  |
| O  | 1.28605100 | -1.43736200 | -1.34690800 |
| O  | 1.28606300 | 1.43733900  | -1.34690800 |
| C  | 1.87505600 | -1.84131000 | -0.29028000 |
| C  | 3.00266200 | -2.84067800 | -0.47575800 |
| C  | 4.25961000 | -2.55138700 | 0.36701500  |

|    |             |             |             |
|----|-------------|-------------|-------------|
| H  | 3.95911500  | -2.46210300 | 1.41708100  |
| H  | 4.91485000  | -3.42771800 | 0.29751600  |
| C  | 4.25964400  | 2.55137100  | 0.36698100  |
| H  | 4.91487900  | 3.42770400  | 0.29744500  |
| H  | 3.95917800  | 2.46210800  | 1.41705700  |
| C  | 3.00267900  | 2.84065200  | -0.47577200 |
| C  | 1.87507300  | 1.84129100  | -0.29028200 |
| Rh | -0.17395700 | -0.00000700 | -1.18347700 |
| O  | -1.59801600 | 1.47771400  | -0.89815400 |
| O  | -1.59801000 | -1.47772700 | -0.89816400 |
| O  | -1.28603000 | 1.43735300  | 1.34677100  |
| O  | -1.28606300 | -1.43730800 | 1.34676700  |
| C  | -1.87503100 | 1.84131000  | 0.29014600  |
| C  | -3.00255700 | 2.84077700  | 0.47559400  |
| C  | -4.25969800 | 2.55130600  | -0.36682700 |
| H  | -3.95948700 | 2.46179500  | -1.41695500 |
| H  | -4.91489700 | 3.42767400  | -0.29735200 |
| C  | -4.25974100 | -2.55128900 | -0.36680500 |
| H  | -4.91492300 | -3.42766700 | -0.29729600 |
| H  | -3.95956100 | -2.46178900 | -1.41694300 |
| C  | -3.00258200 | -2.84073900 | 0.47560200  |
| C  | -1.87505000 | -1.84128700 | 0.29013800  |
| H  | -3.23816700 | 2.88254500  | 1.54277900  |
| H  | -2.59726800 | 3.82030600  | 0.19161100  |
| H  | 2.59738700  | 3.82030200  | -0.19221800 |
| H  | 3.23850200  | 2.88206300  | -1.54292800 |
| H  | 2.59735600  | -3.82032400 | -0.19221200 |
| H  | 3.23851100  | -2.88209200 | -1.54290800 |
| H  | -3.23817400 | -2.88248600 | 1.54279200  |
| H  | -2.59730900 | -3.82027900 | 0.19163000  |
| C  | -5.05257600 | 1.29718300  | 0.04657600  |
| H  | -5.39466500 | 1.40037900  | 1.08612300  |
| H  | -5.95907700 | 1.24750400  | -0.57176700 |
| C  | -4.25297800 | -0.00000100 | -0.11524300 |
| H  | -3.76911400 | -0.00001800 | -1.09763000 |
| H  | -3.44318400 | -0.00000800 | 0.62042300  |
| C  | -5.05262700 | -1.29717600 | 0.04658500  |
| H  | -5.95912100 | -1.24748400 | -0.57176600 |
| H  | -5.39472100 | -1.40038600 | 1.08613000  |
| C  | 5.05258900  | 1.29710400  | -0.04590200 |
| H  | 5.39532000  | 1.40019500  | -1.08524700 |
| H  | 5.95869300  | 1.24726800  | 0.57300200  |
| C  | 4.25277300  | -0.00000600 | 0.11545800  |
| H  | 3.76828400  | 0.00000300  | 1.09752400  |

|   |            |             |             |
|---|------------|-------------|-------------|
| H | 3.44339600 | -0.00000100 | -0.62074600 |
| C | 5.05255300 | -1.29712200 | -0.04589200 |
| H | 5.95866900 | -1.24729000 | 0.57299400  |
| H | 5.39526700 | -1.40021900 | -1.08524300 |

Rh-rea-cb

O 1

|    |             |             |             |
|----|-------------|-------------|-------------|
| Rh | 0.05566100  | 0.02556400  | 0.58421000  |
| O  | -1.29901300 | 1.56082800  | 0.22697300  |
| O  | -1.46594600 | -1.36536700 | 0.71082400  |
| O  | -1.36750500 | 1.20052900  | -2.00750100 |
| O  | -1.49736100 | -1.68260500 | -1.53351500 |
| C  | -1.71726700 | 1.80754600  | -0.95660100 |
| C  | -2.71941800 | 2.96477100  | -1.06839400 |
| C  | -1.98270600 | 4.24885700  | -0.62678400 |
| H  | -1.60172900 | 4.14830700  | 0.39264000  |
| H  | -2.66578600 | 5.10385300  | -0.66725800 |
| H  | -1.13808800 | 4.45931100  | -1.29207600 |
| C  | -3.21533600 | 3.10882700  | -2.51331900 |
| H  | -2.38127000 | 3.30220500  | -3.19197200 |
| H  | -3.91933100 | 3.94565200  | -2.57784600 |
| H  | -3.71864200 | 2.20184800  | -2.85327200 |
| C  | -3.90336000 | 2.69726300  | -0.08444800 |
| H  | -3.50296000 | 2.71566600  | 0.93359300  |
| H  | -4.59952400 | 3.53910400  | -0.18012800 |
| C  | -4.63089800 | 1.39023400  | -0.31656200 |
| C  | -5.75075500 | 1.31096400  | -1.15453100 |
| H  | -6.13708300 | 2.21303700  | -1.62192100 |
| C  | -6.37267700 | 0.08351200  | -1.38771600 |
| H  | -7.24507300 | 0.03340000  | -2.03341500 |
| C  | -5.87893100 | -1.08005400 | -0.79589600 |
| H  | -6.36439100 | -2.03383900 | -0.98581300 |
| C  | -4.76091800 | -1.02770500 | 0.04674800  |
| C  | -4.16187400 | 0.21593500  | 0.28612800  |
| H  | -3.29769400 | 0.27140700  | 0.93663400  |
| C  | -4.17618500 | -2.28015000 | 0.66398900  |
| H  | -4.95794600 | -3.03774900 | 0.79375500  |
| H  | -3.78096000 | -2.04883900 | 1.65685900  |
| C  | -3.02639800 | -2.94211800 | -0.16013500 |
| C  | -3.53816100 | -3.45331800 | -1.51350700 |
| H  | -3.94531400 | -2.63964700 | -2.11688400 |
| H  | -4.32592500 | -4.19712500 | -1.35138400 |
| H  | -2.73085400 | -3.91983700 | -2.08280300 |
| C  | -2.42989400 | -4.10553500 | 0.66285500  |

|    |             |             |             |
|----|-------------|-------------|-------------|
| H  | -1.61411600 | -4.58978000 | 0.11508400  |
| H  | -3.20018600 | -4.85958200 | 0.85635700  |
| H  | -2.03745100 | -3.74716600 | 1.61799800  |
| C  | -1.90830500 | -1.91093000 | -0.36164300 |
| Rh | 0.02301200  | -0.31081800 | -1.84538200 |
| O  | 1.40019900  | -1.83011000 | -1.56816100 |
| O  | 1.53151300  | 1.11412200  | -1.94276900 |
| O  | 1.41233800  | -1.51136700 | 0.67254400  |
| O  | 1.59006900  | 1.37682200  | 0.30943200  |
| C  | 1.78703000  | -2.10486800 | -0.39210200 |
| C  | 2.78627400  | -3.25666400 | -0.23017800 |
| C  | 2.09191600  | -4.53705600 | -0.74359900 |
| H  | 1.77102700  | -4.41848400 | -1.78147300 |
| H  | 2.78189100  | -5.38511000 | -0.68086800 |
| H  | 1.21220600  | -4.77216500 | -0.13435900 |
| C  | 3.19317100  | -3.42765200 | 1.24015600  |
| H  | 2.32116100  | -3.64015200 | 1.86317400  |
| H  | 3.89786900  | -4.26157200 | 1.33001200  |
| H  | 3.66583100  | -2.52498500 | 1.63120100  |
| C  | 4.02601500  | -2.95349700 | -1.13135000 |
| H  | 3.69523600  | -2.96516900 | -2.17415300 |
| H  | 4.72934100  | -3.78451200 | -1.00183100 |
| C  | 4.71138300  | -1.63746200 | -0.83254900 |
| C  | 5.76425700  | -1.55188000 | 0.08782100  |
| H  | 6.12708000  | -2.45381900 | 0.57365600  |
| C  | 6.35090400  | -0.31974900 | 0.37868500  |
| H  | 7.17302000  | -0.26605300 | 1.08698100  |
| C  | 5.88691700  | 0.84313400  | -0.23773900 |
| H  | 6.34699600  | 1.80069700  | -0.00735100 |
| C  | 4.83460400  | 0.78518700  | -1.16090900 |
| C  | 4.27186100  | -0.46290100 | -1.45602100 |
| H  | 3.46023900  | -0.51853600 | -2.17351500 |
| C  | 4.27634900  | 2.03526400  | -1.80650300 |
| H  | 5.05947800  | 2.79730800  | -1.89829900 |
| H  | 3.92889700  | 1.80105800  | -2.81702900 |
| C  | 3.08699700  | 2.68788700  | -1.03185500 |
| C  | 3.53675000  | 3.21066300  | 0.33926100  |
| H  | 3.93649700  | 2.40359700  | 0.95670100  |
| H  | 4.31507300  | 3.97033600  | 0.20880000  |
| H  | 2.69580900  | 3.65971300  | 0.87295900  |
| C  | 2.50934000  | 3.84451300  | -1.87580700 |
| H  | 1.66972200  | 4.32190100  | -1.35832700 |
| H  | 3.27904000  | 4.60518800  | -2.04439100 |
| H  | 2.15475700  | 3.48068200  | -2.84304800 |

|   |             |             |             |
|---|-------------|-------------|-------------|
| C | 1.97898500  | 1.63687600  | -0.87789200 |
| C | 0.00371300  | 0.36760500  | 2.50962700  |
| C | 1.11076600  | 1.05384000  | 3.20100400  |
| O | 1.98491200  | 0.39697500  | 3.72735000  |
| C | -1.10069000 | -0.16937400 | 3.33080500  |
| O | -0.93214800 | -1.13554700 | 4.04474900  |
| O | 1.03555300  | 2.38413600  | 3.14898000  |
| O | -2.24713300 | 0.49047900  | 3.13716700  |
| C | 2.14807400  | 3.08301600  | 3.75380900  |
| H | 3.08096300  | 2.79405100  | 3.26668500  |
| H | 1.94232900  | 4.14065300  | 3.59663400  |
| H | 2.20565800  | 2.85300700  | 4.82045200  |
| C | -3.40294200 | -0.02608300 | 3.83481800  |
| H | -4.26296000 | 0.40247300  | 3.32222700  |
| H | -3.42230600 | -1.11578700 | 3.78155100  |
| H | -3.37620200 | 0.28735400  | 4.88159500  |

Rh-sim-cb

O 1

|    |             |             |             |
|----|-------------|-------------|-------------|
| Rh | -0.06010000 | 0.35282300  | -0.28336000 |
| O  | -1.51430900 | -0.69269400 | -1.32729900 |
| O  | -1.33747200 | 0.56295100  | 1.35383100  |
| O  | -0.92185900 | -2.65722800 | -0.35360800 |
| O  | -0.77332800 | -1.44086700 | 2.25366900  |
| C  | -1.65119100 | -1.94557300 | -1.10623900 |
| C  | -2.80005300 | -2.63939100 | -1.81958600 |
| C  | -4.12345900 | -1.85305900 | -1.81741500 |
| H  | -3.92368100 | -0.85280200 | -2.21683200 |
| H  | -4.80787800 | -2.34413800 | -2.51914700 |
| C  | -3.86133400 | 0.37411700  | 2.75930400  |
| H  | -4.46163500 | 0.66488700  | 3.62962900  |
| H  | -3.65582000 | 1.28864400  | 2.19151600  |
| C  | -2.52283600 | -0.18444700 | 3.27828400  |
| C  | -1.45755400 | -0.37584700 | 2.21125400  |
| Rh | 0.59335400  | -1.77364500 | 0.74605900  |
| O  | 2.03776900  | -0.69647600 | 1.79697200  |
| O  | 1.90840800  | -2.03489100 | -0.83637700 |
| O  | 1.46816900  | 1.25338400  | 0.78213600  |
| O  | 1.29338600  | -0.06428100 | -1.77380400 |
| C  | 2.19014700  | 0.53658100  | 1.56015200  |
| C  | 3.33273400  | 1.26245600  | 2.25244900  |
| C  | 4.67281600  | 0.50361100  | 2.23214100  |
| H  | 4.50541300  | -0.50031600 | 2.63824800  |
| H  | 5.35638800  | 1.01574400  | 2.91977400  |

|   |             |             |             |
|---|-------------|-------------|-------------|
| C | 4.41390300  | -1.78273600 | -2.31769200 |
| H | 5.00675100  | -2.05080500 | -3.20021200 |
| H | 4.26241100  | -2.70406700 | -1.74408200 |
| C | 3.04172500  | -1.28649200 | -2.81091700 |
| C | 2.00245200  | -1.12831600 | -1.71471000 |
| H | 3.43121600  | 2.25107300  | 1.79417800  |
| H | 3.01765400  | 1.41221000  | 3.29291800  |
| H | -2.10157600 | 0.51458800  | 4.01196000  |
| H | -2.65721000 | -1.14493200 | 3.78413600  |
| H | -2.47354800 | -2.79136400 | -2.85618600 |
| H | -2.92005100 | -3.62773300 | -1.36693200 |
| H | 3.12613300  | -0.32987900 | -3.33399300 |
| H | 2.62886200  | -2.01221000 | -3.52316000 |
| C | 5.33963000  | 0.39110100  | 0.84843600  |
| H | 5.55181200  | 1.39559700  | 0.45521100  |
| H | 6.31343100  | -0.10023000 | 0.97791800  |
| C | 4.49930900  | -0.40082300 | -0.15957900 |
| H | 4.13547000  | -1.31430500 | 0.32212700  |
| H | 3.60992400  | 0.18701800  | -0.40689400 |
| C | 5.20821200  | -0.77438800 | -1.46639200 |
| H | 6.18708700  | -1.21713500 | -1.23751300 |
| H | 5.40956000  | 0.13117100  | -2.05598000 |
| C | -4.68149800 | -0.59404800 | 1.88550400  |
| H | -4.94349000 | -1.48967000 | 2.46629600  |
| H | -5.63272300 | -0.10366900 | 1.63487400  |
| C | -3.95852900 | -0.99420600 | 0.59461200  |
| H | -3.53248700 | -0.09724400 | 0.13811400  |
| H | -3.10825100 | -1.63157600 | 0.85785400  |
| C | -4.81261100 | -1.72862700 | -0.44529500 |
| H | -5.75990900 | -1.18966300 | -0.58746700 |
| H | -5.08269000 | -2.72752400 | -0.07496900 |
| C | -0.67811000 | 2.08856500  | -0.94811000 |
| C | -1.94309300 | 2.23967400  | -1.69091000 |
| O | -1.93518900 | 2.46041300  | -2.88418200 |
| C | 0.14690300  | 3.29011100  | -0.71474000 |
| O | 0.89945100  | 3.69285300  | -1.57670300 |
| O | -3.02297700 | 2.07264300  | -0.92139300 |
| O | -0.00843600 | 3.79372000  | 0.51053600  |
| C | -4.29150300 | 2.13958100  | -1.60818200 |
| H | -4.30849300 | 1.43489700  | -2.44184200 |
| H | -5.03578700 | 1.87068400  | -0.85992700 |
| H | -4.46663400 | 3.15061900  | -1.98429900 |
| C | 0.94558100  | 4.81105100  | 0.88436800  |
| H | 0.65890700  | 5.12059300  | 1.88828100  |

|   |            |            |            |
|---|------------|------------|------------|
| H | 1.95202400 | 4.38535100 | 0.88378900 |
| H | 0.90363500 | 5.65361700 | 0.19050000 |

TS1-A

0 1

|    |            |             |             |
|----|------------|-------------|-------------|
| Rh | 2.14255800 | 0.16517300  | -0.34233500 |
| O  | 1.31795500 | 1.17921600  | 1.28387100  |
| O  | 3.15910600 | 1.85167700  | -0.98521300 |
| O  | 3.12232900 | 0.74795600  | 2.58589200  |
| O  | 4.89392700 | 1.44433200  | 0.42113500  |
| C  | 2.00692200 | 1.30874600  | 2.34696000  |
| C  | 1.43750000 | 2.21382200  | 3.42956400  |
| C  | 0.78829400 | 3.50465100  | 2.89628100  |
| H  | 0.08670700 | 3.22960600  | 2.10262300  |
| H  | 0.20170100 | 3.95068400  | 3.70914900  |
| C  | 3.95022500 | 4.64005700  | -0.94708300 |
| H  | 4.47555500 | 5.47175000  | -1.43139200 |
| H  | 3.13049800 | 4.35073800  | -1.61065900 |
| C  | 4.92524400 | 3.45310100  | -0.85451400 |
| C  | 4.27290800 | 2.14445900  | -0.44429300 |
| Rh | 4.05492000 | -0.31188400 | 1.06772800  |
| O  | 4.91155900 | -1.28244300 | -0.55099500 |
| O  | 3.10967900 | -2.07353000 | 1.65618300  |
| O  | 3.06846100 | -0.91410800 | -1.82256500 |
| O  | 1.30872300 | -1.60608600 | 0.36255900  |
| C  | 4.22979000 | -1.39791500 | -1.61898200 |
| C  | 4.83346700 | -2.18694100 | -2.76724300 |
| C  | 5.45252800 | -3.53645300 | -2.35913700 |
| H  | 6.19129300 | -3.35541500 | -1.57005100 |
| H  | 5.99989000 | -3.92821400 | -3.22454400 |
| C  | 2.36792000 | -4.89312600 | 1.46696200  |
| H  | 1.86325300 | -5.75282000 | 1.92347900  |
| H  | 3.21240700 | -4.63709300 | 2.11651800  |
| C  | 1.37687400 | -3.71598600 | 1.46656000  |
| C  | 1.98892900 | -2.36103600 | 1.13799800  |
| H  | 4.05564000 | -2.31442800 | -3.52539200 |
| H  | 5.61294100 | -1.55007800 | -3.20387300 |
| H  | 5.37642600 | 3.28031500  | -1.83985100 |
| H  | 5.74002000 | 3.65338000  | -0.15276500 |
| H  | 0.68068200 | 1.62635300  | 3.96501100  |
| H  | 2.23896800 | 2.43064900  | 4.14141800  |
| H  | 0.55455500 | -3.88827700 | 0.76696000  |
| H  | 0.92572600 | -3.62636200 | 2.46285500  |
| C  | 4.44503600 | -4.59738700 | -1.87856600 |

|   |             |             |             |
|---|-------------|-------------|-------------|
| H | 3.71860000  | -4.80794900 | -2.67699900 |
| H | 4.98955600  | -5.53532000 | -1.70430300 |
| C | 3.71094500  | -4.19067300 | -0.59605900 |
| H | 4.43728700  | -3.79653900 | 0.12228700  |
| H | 3.04061500  | -3.35805600 | -0.82732800 |
| C | 2.89476700  | -5.29708800 | 0.07817600  |
| H | 3.51886600  | -6.19347100 | 0.19353200  |
| H | 2.05308200  | -5.59028200 | -0.56639600 |
| C | 3.37392500  | 5.12510000  | 0.39678800  |
| H | 4.18783900  | 5.48986200  | 1.03955200  |
| H | 2.73110900  | 5.99392300  | 0.19664500  |
| C | 2.56409700  | 4.05310700  | 1.13557600  |
| H | 1.87898200  | 3.57060100  | 0.43305200  |
| H | 3.25279200  | 3.27174100  | 1.47307900  |
| C | 1.76953300  | 4.55504600  | 2.34587600  |
| H | 1.18950700  | 5.44284700  | 2.05893800  |
| H | 2.45439600  | 4.87857300  | 3.14251800  |
| C | -0.01505800 | 0.68426900  | -1.77216000 |
| C | 0.16187100  | 2.01825700  | -2.41550000 |
| O | 0.07086100  | 2.25837600  | -3.60318100 |
| C | 0.21946600  | -0.50793800 | -2.60872100 |
| O | 0.80774000  | -0.55491100 | -3.66593400 |
| O | 0.37112200  | 2.97701200  | -1.48532200 |
| O | -0.29906500 | -1.64112800 | -2.01182500 |
| C | 0.36666800  | 4.32220000  | -1.98548000 |
| H | -0.61672100 | 4.57104500  | -2.38863000 |
| H | 0.58689900  | 4.95361900  | -1.12550300 |
| H | 1.12353700  | 4.44336400  | -2.76352700 |
| C | 0.20903900  | -2.87154400 | -2.54055900 |
| H | -0.19567500 | -3.65794600 | -1.90074000 |
| H | -0.10701400 | -3.01746800 | -3.57755300 |
| H | 1.30050600  | -2.86965800 | -2.49668200 |
| C | -5.87435200 | -1.58367800 | -1.12682600 |
| C | -5.69712600 | -0.44141300 | -1.96182700 |
| C | -6.57758200 | 0.64660700  | -1.82055400 |
| C | -7.56958300 | 0.58925400  | -0.84901600 |
| C | -7.71012700 | -0.53911300 | -0.01537200 |
| C | -6.86864600 | -1.63982700 | -0.14321700 |
| C | -4.08713300 | -1.94627800 | -2.42450700 |
| C | -4.53022900 | -0.69333400 | -2.77259900 |
| H | -6.46846100 | 1.53387800  | -2.43389600 |
| H | -8.23999200 | 1.43297300  | -0.71941100 |
| H | -8.48701200 | -0.54805900 | 0.74321600  |
| H | -6.97225500 | -2.50306700 | 0.50591400  |



|   |             |             |             |
|---|-------------|-------------|-------------|
| H | -3.22490800 | -2.48641000 | -2.79281200 |
| N | -4.89837700 | -2.50904300 | -1.45423000 |
| C | -4.19799700 | -3.40377700 | 1.89600600  |
| C | -2.44887300 | -2.64622000 | 0.43416800  |
| C | -3.46980600 | -2.97211900 | 3.00332200  |
| H | -5.16771100 | -3.87176600 | 2.04921800  |
| C | -1.71131100 | -2.20431900 | 1.52928400  |
| H | -2.02409000 | -2.50561300 | -0.55472900 |
| C | -2.22810300 | -2.34999400 | 2.82005300  |
| H | -3.85318400 | -3.09171400 | 4.01106100  |
| H | -0.73506600 | -1.77309000 | 1.36349000  |
| O | -1.58494700 | -1.91311500 | 3.94339700  |
| C | -3.82376000 | 0.23819000  | -3.71368200 |
| H | -2.91630900 | -0.24731700 | -4.08948100 |
| H | -4.43361000 | 0.46043800  | -4.59899600 |
| C | -3.46227200 | 1.61756600  | -3.11359100 |
| H | -2.75251200 | 2.12408600  | -3.77414600 |
| H | -4.35426000 | 2.23311500  | -3.02051200 |
| N | -2.84490700 | 1.56017600  | -1.76234700 |
| C | -1.98439000 | 0.57490300  | -1.43531500 |
| C | -0.86591000 | 0.62818300  | -0.49643000 |
| H | -2.17305200 | -0.37948000 | -1.90141100 |
| H | -0.72578700 | -0.27300900 | 0.08183200  |
| H | -0.75598600 | 1.52480100  | 0.10008800  |
| S | -3.28204200 | 2.82421500  | -0.61073400 |
| O | -4.59405200 | 3.27680500  | -1.07670500 |
| O | -2.17907300 | 3.77545200  | -0.47841800 |
| C | -3.43886500 | 1.93028200  | 0.92724700  |
| C | -4.33331500 | 0.86508100  | 1.03713100  |
| C | -2.73125200 | 2.40751400  | 2.03228400  |
| C | -4.51555900 | 0.27184000  | 2.28226200  |
| H | -4.87833700 | 0.50648000  | 0.17527900  |
| C | -2.93537400 | 1.80283800  | 3.27005300  |
| H | -2.04983600 | 3.24158600  | 1.92022400  |
| C | -3.83531300 | 0.73606900  | 3.41819400  |
| H | -5.20088000 | -0.56441800 | 2.36592200  |
| H | -2.39824400 | 2.17734200  | 4.13746700  |
| C | -4.05267000 | 0.09965900  | 4.76751800  |
| H | -4.01590500 | 0.84578600  | 5.56724400  |
| H | -5.01975300 | -0.40787500 | 4.81673300  |
| H | -3.27347900 | -0.64414100 | 4.96389400  |
| C | -0.47688800 | -1.02837100 | 3.77343700  |
| H | 0.40033600  | -1.54012500 | 3.36291100  |
| H | -0.73455300 | -0.18595500 | 3.12068100  |

|   |             |             |             |
|---|-------------|-------------|-------------|
| H | -0.23365200 | -0.66132200 | 4.77178800  |
| C | -3.70605800 | -3.23759800 | 0.59494100  |
| C | -4.51304800 | -3.64909300 | -0.62287800 |
| H | -3.93900000 | -4.32878600 | -1.26122100 |
| H | -5.42043000 | -4.18287600 | -0.32493100 |

TS1-B

0 1

|    |             |             |             |
|----|-------------|-------------|-------------|
| Rh | 2.09571400  | 0.15591300  | -0.15762700 |
| O  | 1.26776800  | 1.05342300  | 1.53666100  |
| O  | 2.69929800  | 1.96988900  | -0.93573900 |
| O  | 3.26072100  | 1.04008500  | 2.61720200  |
| O  | 4.61331300  | 1.97560700  | 0.27322500  |
| C  | 2.03335000  | 1.35369100  | 2.51116000  |
| C  | 1.43249600  | 2.15367200  | 3.65527300  |
| C  | 0.44042700  | 3.24238700  | 3.21260000  |
| H  | -0.29437300 | 2.77313600  | 2.55344000  |
| H  | -0.10048200 | 3.59015700  | 4.10159200  |
| C  | 2.81947300  | 4.85436200  | -1.01334300 |
| H  | 3.09207600  | 5.75443500  | -1.57749200 |
| H  | 2.01075200  | 4.35912000  | -1.56007100 |
| C  | 4.05266000  | 3.92773000  | -0.99043000 |
| C  | 3.76833000  | 2.51446700  | -0.51241800 |
| Rh | 4.19402900  | 0.10540200  | 1.03570000  |
| O  | 5.04255100  | -0.77541300 | -0.64030800 |
| O  | 3.62636400  | -1.75741500 | 1.77627500  |
| O  | 3.04645300  | -0.79498500 | -1.71571200 |
| O  | 1.63829500  | -1.67392400 | 0.68846200  |
| C  | 4.28946500  | -1.05988100 | -1.62355900 |
| C  | 4.91013700  | -1.79401900 | -2.79910000 |
| C  | 5.72788700  | -3.03972700 | -2.40770800 |
| H  | 6.49417200  | -2.73591900 | -1.68552200 |
| H  | 6.25523900  | -3.38653900 | -3.30433800 |
| C  | 3.29967900  | -4.67718600 | 1.75255200  |
| H  | 2.99383900  | -5.58728000 | 2.28212400  |
| H  | 4.18662000  | -4.29209700 | 2.26839100  |
| C  | 2.16380600  | -3.64801600 | 1.90629000  |
| C  | 2.50936200  | -2.24872800 | 1.42271900  |
| H  | 4.10686100  | -2.04956700 | -3.49571800 |
| H  | 5.56897300  | -1.07633600 | -3.30334700 |
| H  | 4.45320300  | 3.83226000  | -2.00853000 |
| H  | 4.85377000  | 4.33717500  | -0.36807000 |
| H  | 0.91513700  | 1.43413200  | 4.30216000  |
| H  | 2.25925600  | 2.57036600  | 4.23759100  |

|   |             |             |             |
|---|-------------|-------------|-------------|
| H | 1.25952800  | -3.96897200 | 1.38175700  |
| H | 1.91247800  | -3.56134400 | 2.97115800  |
| C | 4.91006200  | -4.20508200 | -1.82018600 |
| H | 4.15224300  | -4.53200600 | -2.54709800 |
| H | 5.58614100  | -5.05900600 | -1.67825800 |
| C | 4.24386700  | -3.85572800 | -0.48403400 |
| H | 4.96960900  | -3.32957200 | 0.14514000  |
| H | 3.43600400  | -3.14340900 | -0.67339500 |
| C | 3.67266300  | -5.04039400 | 0.30340400  |
| H | 4.41639700  | -5.84809300 | 0.33699400  |
| H | 2.79469800  | -5.45130000 | -0.21500000 |
| C | 2.29062300  | 5.27079700  | 0.37086100  |
| H | 3.07524200  | 5.80252700  | 0.92896300  |
| H | 1.47397300  | 5.98908300  | 0.22066400  |
| C | 1.77602100  | 4.08385100  | 1.19051300  |
| H | 1.10314800  | 3.48851900  | 0.56492200  |
| H | 2.62800500  | 3.44044100  | 1.43191900  |
| C | 1.06796600  | 4.45253700  | 2.49754100  |
| H | 0.27048300  | 5.17774600  | 2.28670000  |
| H | 1.77128900  | 4.95576100  | 3.17656300  |
| C | -0.14211100 | 0.38339800  | -1.61185800 |
| C | 0.26398400  | 1.62418700  | -2.31507100 |
| O | -0.02157800 | 2.73388200  | -1.89831700 |
| C | 0.02700500  | -1.00730700 | -2.08202800 |
| O | -0.43368700 | -1.96715000 | -1.46993500 |
| O | 0.96896000  | 1.42020400  | -3.44404300 |
| O | 0.67911400  | -1.14950000 | -3.24660000 |
| C | 1.49527600  | 2.60591700  | -4.05353500 |
| H | 2.26572400  | 3.03946900  | -3.41182600 |
| H | 1.92796900  | 2.27944600  | -4.99981000 |
| H | 0.70964100  | 3.34709500  | -4.22215100 |
| C | 1.02038300  | -2.49859100 | -3.58691400 |
| H | 1.53728100  | -2.43316800 | -4.54471700 |
| H | 1.68253600  | -2.91886300 | -2.82546000 |
| H | 0.12768000  | -3.12400000 | -3.67509900 |
| C | -5.92550600 | -1.76749600 | -1.14459800 |
| C | -5.67757900 | -0.67890200 | -2.03283600 |
| C | -6.56755600 | 0.41032200  | -2.03904300 |
| C | -7.63885000 | 0.41122500  | -1.15365700 |
| C | -7.84824100 | -0.66054800 | -0.26190100 |
| C | -6.99889700 | -1.76264500 | -0.24617500 |
| C | -4.04401600 | -2.21089500 | -2.27187500 |
| C | -4.45013400 | -0.98005600 | -2.72848000 |
| H | -6.40579200 | 1.25731500  | -2.69586500 |

|   |             |             |             |
|---|-------------|-------------|-------------|
| H | -8.31780700 | 1.25797600  | -1.13706800 |
| H | -8.68602300 | -0.62424000 | 0.42805000  |
| H | -7.15972100 | -2.58329000 | 0.44530200  |
| H | -3.15012800 | -2.76427100 | -2.52668000 |
| N | -4.93304300 | -2.71258300 | -1.33872900 |
| C | -4.34566600 | -3.29322200 | 2.05004100  |
| C | -2.47609100 | -2.98908100 | 0.57283100  |
| C | -3.59193600 | -2.79249200 | 3.10825300  |
| H | -5.37137300 | -3.60760500 | 2.22942700  |
| C | -1.70869400 | -2.47098800 | 1.61502100  |
| H | -2.01207800 | -3.05676100 | -0.40269500 |
| C | -2.28016600 | -2.34852500 | 2.88779300  |
| H | -4.00791200 | -2.71393300 | 4.10659600  |
| H | -0.68498200 | -2.17870600 | 1.41019400  |
| O | -1.63748600 | -1.80959800 | 3.96677000  |
| C | -3.66625500 | -0.11718300 | -3.67490600 |
| H | -2.72073400 | -0.61881300 | -3.91213700 |
| H | -4.18781800 | 0.00974800  | -4.63317000 |
| C | -3.38159500 | 1.31906100  | -3.17781000 |
| H | -2.66097400 | 1.79311700  | -3.85416100 |
| H | -4.29518700 | 1.90942500  | -3.19707800 |
| N | -2.83977000 | 1.41143300  | -1.80383000 |
| C | -2.02824100 | 0.44297700  | -1.31454100 |
| C | -0.96469200 | 0.58866300  | -0.33025000 |
| H | -2.28241600 | -0.57257200 | -1.58469900 |
| H | -0.88321300 | -0.22202500 | 0.38273200  |
| H | -0.81004200 | 1.57181500  | 0.09661700  |
| S | -3.39231700 | 2.75916000  | -0.79957000 |
| O | -4.69193700 | 3.09992800  | -1.38682300 |
| O | -2.35845000 | 3.77815400  | -0.65784600 |
| C | -3.61483000 | 1.96696500  | 0.78600800  |
| C | -4.52944100 | 0.92426300  | 0.93539900  |
| C | -2.89796100 | 2.47146500  | 1.87166400  |
| C | -4.71058400 | 0.37224900  | 2.20055400  |
| H | -5.08964100 | 0.55245700  | 0.08833400  |
| C | -3.09461000 | 1.90479900  | 3.12745700  |
| H | -2.20768500 | 3.29290900  | 1.72283300  |
| C | -4.00310200 | 0.85187900  | 3.31311200  |
| H | -5.41041800 | -0.44802700 | 2.31721900  |
| H | -2.53750800 | 2.29130100  | 3.97658900  |
| C | -4.19115200 | 0.24788600  | 4.68144000  |
| H | -4.23863100 | 1.02397800  | 5.45218000  |
| H | -5.10791300 | -0.34490200 | 4.73542000  |
| H | -3.34858800 | -0.41065800 | 4.91770900  |

|   |             |             |             |
|---|-------------|-------------|-------------|
| C | -0.40038600 | -1.14195400 | 3.73339100  |
| H | 0.38091700  | -1.83599000 | 3.40491800  |
| H | -0.49819500 | -0.34852400 | 2.98321300  |
| H | -0.11146300 | -0.71102600 | 4.69346100  |
| C | -3.80331200 | -3.38225000 | 0.76218400  |
| C | -4.62850700 | -3.82224900 | -0.43129300 |
| H | -4.09423400 | -4.57646900 | -1.01815900 |
| H | -5.57365800 | -4.27244300 | -0.11473300 |

TS1-C

0 1

|    |             |             |             |
|----|-------------|-------------|-------------|
| Rh | 2.10025400  | 0.17157200  | -0.17739100 |
| O  | 1.29012700  | 0.98985400  | 1.56922800  |
| O  | 2.64709700  | 2.02791000  | -0.88550700 |
| O  | 3.30981400  | 0.97469100  | 2.60139300  |
| O  | 4.59635300  | 2.01573800  | 0.26535200  |
| C  | 2.07341400  | 1.26190200  | 2.53781200  |
| C  | 1.48276600  | 1.99068500  | 3.73403700  |
| C  | 0.46894300  | 3.08751500  | 3.36745200  |
| H  | -0.27519900 | 2.64022100  | 2.70409900  |
| H  | -0.05453400 | 3.38691700  | 4.28419700  |
| C  | 2.71175300  | 4.91267500  | -0.84617700 |
| H  | 2.95245400  | 5.84028500  | -1.37933400 |
| H  | 1.89933700  | 4.42443200  | -1.39440400 |
| C  | 3.96285700  | 4.01111300  | -0.89228600 |
| C  | 3.71907300  | 2.57296400  | -0.46959000 |
| Rh | 4.22842700  | 0.11156600  | 0.96833100  |
| O  | 5.04170400  | -0.70593000 | -0.76027400 |
| O  | 3.72185900  | -1.78634100 | 1.66025600  |
| O  | 3.01578400  | -0.71577000 | -1.77884900 |
| O  | 1.70565000  | -1.70829200 | 0.62443500  |
| C  | 4.26316300  | -0.97080500 | -1.73035300 |
| C  | 4.84695700  | -1.66311200 | -2.94887000 |
| C  | 5.72072700  | -2.88975000 | -2.62622100 |
| H  | 6.50800000  | -2.58113800 | -1.92879900 |
| H  | 6.21934800  | -3.19647600 | -3.55329700 |
| C  | 3.45787300  | -4.70897300 | 1.55884200  |
| H  | 3.18380700  | -5.64009900 | 2.06893900  |
| H  | 4.34670400  | -4.31764900 | 2.06638300  |
| C  | 2.30409800  | -3.70925700 | 1.76487200  |
| C  | 2.60813000  | -2.28789300 | 1.31654300  |
| H  | 4.01516000  | -1.92535900 | -3.60859100 |
| H  | 5.45756900  | -0.91458800 | -3.46914100 |
| H  | 4.34018300  | 3.96746200  | -1.92265400 |

|   |             |             |             |
|---|-------------|-------------|-------------|
| H | 4.77100500  | 4.40998300  | -0.27204300 |
| H | 0.98551500  | 1.22929800  | 4.34920300  |
| H | 2.31368100  | 2.38717800  | 4.32431500  |
| H | 1.39707000  | -4.03700500 | 1.24847300  |
| H | 2.06851500  | -3.65764100 | 2.83569100  |
| C | 4.96529200  | -4.09671800 | -2.03920600 |
| H | 4.19169200  | -4.43011200 | -2.74594100 |
| H | 5.67349700  | -4.93085500 | -1.94270600 |
| C | 4.33726600  | -3.80308300 | -0.67207400 |
| H | 5.07198000  | -3.28454200 | -0.04721000 |
| H | 3.51380500  | -3.09796100 | -0.81256800 |
| C | 3.80725500  | -5.02144500 | 0.09180800  |
| H | 4.56624000  | -5.81531200 | 0.08473200  |
| H | 2.92651600  | -5.43536600 | -0.42060400 |
| C | 2.21204400  | 5.26337300  | 0.56735000  |
| H | 3.00168700  | 5.78777800  | 1.12528100  |
| H | 1.37844400  | 5.97086900  | 0.46788900  |
| C | 1.74214300  | 4.03563200  | 1.35279400  |
| H | 1.06174100  | 3.45383400  | 0.72275700  |
| H | 2.61084000  | 3.39815900  | 1.54389800  |
| C | 1.06410500  | 4.33683300  | 2.69298400  |
| H | 0.25313000  | 5.06070000  | 2.53495700  |
| H | 1.77906200  | 4.81831200  | 3.37553100  |
| C | -0.06870500 | 0.43145300  | -1.63873300 |
| C | 0.28020700  | 1.69043700  | -2.33570300 |
| O | -0.10646200 | 2.78468600  | -1.95707600 |
| C | 0.11864500  | -0.88698400 | -2.28559500 |
| O | 0.51080900  | -1.11753900 | -3.40921700 |
| O | 1.07829800  | 1.51634800  | -3.40304000 |
| O | -0.23499000 | -1.89918000 | -1.42677000 |
| C | 1.54482700  | 2.72248400  | -4.01708000 |
| H | 2.21616700  | 3.25173100  | -3.33667600 |
| H | 2.08158000  | 2.40445700  | -4.91126700 |
| H | 0.71251000  | 3.38132000  | -4.27981300 |
| C | 0.20936700  | -3.20132500 | -1.82813600 |
| H | -0.09111700 | -3.87451100 | -1.02478900 |
| H | -0.24692500 | -3.50092500 | -2.77600700 |
| H | 1.29621300  | -3.20267600 | -1.93919800 |
| C | -6.02667700 | -1.56796600 | -1.21700200 |
| C | -5.74005800 | -0.42630600 | -2.02222000 |
| C | -6.55620300 | 0.71296900  | -1.90114500 |
| C | -7.58991600 | 0.70607800  | -0.97276700 |
| C | -7.83599600 | -0.42161400 | -0.16344100 |
| C | -7.06199800 | -1.57229700 | -0.27492900 |

|   |             |             |             |
|---|-------------|-------------|-------------|
| C | -4.21901500 | -2.02973600 | -2.45308000 |
| C | -4.55697900 | -0.74134500 | -2.78777300 |
| H | -6.36265800 | 1.60165100  | -2.48990700 |
| H | -8.20932600 | 1.58979300  | -0.85706400 |
| H | -8.64239900 | -0.39095900 | 0.56310600  |
| H | -7.25138700 | -2.43698300 | 0.35281900  |
| H | -3.39080600 | -2.62569200 | -2.81308800 |
| N | -5.10529800 | -2.55473600 | -1.52656300 |
| C | -4.38186500 | -3.48035700 | 1.81947300  |
| C | -2.63382800 | -2.91951000 | 0.27680800  |
| C | -3.56763700 | -3.08987600 | 2.88093700  |
| H | -5.38267600 | -3.85262700 | 2.02609600  |
| C | -1.80158000 | -2.52377100 | 1.32111400  |
| H | -2.25357100 | -2.83873400 | -0.73267700 |
| C | -2.28515300 | -2.57865000 | 2.63489400  |
| H | -3.91706800 | -3.14715500 | 3.90607100  |
| H | -0.79563300 | -2.19013600 | 1.09395000  |
| O | -1.58059100 | -2.15364000 | 3.72346400  |
| C | -3.74786900 | 0.15032600  | -3.68547300 |
| H | -2.83469200 | -0.37742100 | -3.98409800 |
| H | -4.28185900 | 0.37927500  | -4.61737700 |
| C | -3.38006400 | 1.52662300  | -3.08363900 |
| H | -2.63758200 | 2.01329000  | -3.72522400 |
| H | -4.25953100 | 2.16537200  | -3.04345800 |
| N | -2.81986900 | 1.48542300  | -1.71443800 |
| C | -2.01834000 | 0.47917500  | -1.31167800 |
| C | -0.91050100 | 0.57737800  | -0.36392000 |
| H | -2.27313000 | -0.50863300 | -1.67146700 |
| H | -0.82148100 | -0.24655600 | 0.33097900  |
| H | -0.76370000 | 1.54398300  | 0.10477500  |
| S | -3.30868000 | 2.77855700  | -0.59206700 |
| O | -4.60577000 | 3.19987400  | -1.12910800 |
| O | -2.24489300 | 3.75418800  | -0.38830800 |
| C | -3.52142300 | 1.86826200  | 0.93200900  |
| C | -4.39364500 | 0.78197800  | 1.00466500  |
| C | -2.84552700 | 2.33610700  | 2.05929400  |
| C | -4.56981100 | 0.14739500  | 2.23046400  |
| H | -4.92109800 | 0.43376200  | 0.12788200  |
| C | -3.03623200 | 1.68658300  | 3.27592700  |
| H | -2.18873900 | 3.19294600  | 1.97448300  |
| C | -3.89869200 | 0.58553800  | 3.38218900  |
| H | -5.23497700 | -0.70715100 | 2.28449500  |
| H | -2.50844200 | 2.04496500  | 4.15549100  |
| C | -4.07520400 | -0.11976400 | 4.70294000  |

|   |             |             |             |
|---|-------------|-------------|-------------|
| H | -4.06818900 | 0.59008300  | 5.53588600  |
| H | -5.01448100 | -0.67830300 | 4.73561600  |
| H | -3.25696100 | -0.83115400 | 4.85916300  |
| C | -0.41956300 | -1.35516400 | 3.48787700  |
| H | 0.36866400  | -1.91696800 | 2.97832100  |
| H | -0.65379600 | -0.46766100 | 2.88887200  |
| H | -0.06492600 | -1.05126800 | 4.47405900  |
| C | -3.93346700 | -3.38217700 | 0.49698400  |
| C | -4.81543300 | -3.72176200 | -0.69116500 |
| H | -4.33178400 | -4.46362000 | -1.33565500 |
| H | -5.76450800 | -4.15557200 | -0.36427000 |

TS2-I

0 1

|   |             |             |             |
|---|-------------|-------------|-------------|
| C | -1.37346500 | -0.74527100 | -0.16420700 |
| C | -1.89435500 | 0.28623600  | -1.01269900 |
| O | -3.04244400 | 0.28571000  | -1.51864200 |
| C | -2.19241700 | -1.93716700 | 0.00869900  |
| O | -3.40717100 | -2.01024500 | -0.23539300 |
| O | -1.06357500 | 1.29897100  | -1.29045900 |
| O | -1.50830600 | -2.97258400 | 0.47713800  |
| C | -1.61278100 | 2.33001900  | -2.15586100 |
| H | -2.54291300 | 2.71803400  | -1.73558600 |
| H | -0.83954300 | 3.09286900  | -2.19815700 |
| H | -1.81405300 | 1.91371600  | -3.14505300 |
| C | -2.26018000 | -4.14564700 | 0.85374800  |
| H | -1.52544700 | -4.80845900 | 1.30763000  |
| H | -3.04376500 | -3.87418100 | 1.56423800  |
| H | -2.71537100 | -4.60156200 | -0.02829700 |
| C | 4.67596200  | 0.86032800  | -1.83941000 |
| C | 4.20546800  | -0.41612300 | -2.27026500 |
| C | 5.09308100  | -1.50652600 | -2.28101100 |
| C | 6.39836600  | -1.31967400 | -1.84055600 |
| C | 6.84083300  | -0.05355100 | -1.40246800 |
| C | 5.99338100  | 1.05036900  | -1.40467400 |
| C | 2.51321300  | 1.06302700  | -2.38614100 |
| C | 2.81230000  | -0.26113700 | -2.60054600 |
| H | 4.76437500  | -2.48378000 | -2.62171600 |
| H | 7.09052400  | -2.15588100 | -1.83749700 |
| H | 7.86756400  | 0.06561900  | -1.06964200 |
| H | 6.35108200  | 2.02319900  | -1.08239900 |
| H | 1.56522600  | 1.57360600  | -2.48512000 |
| N | 3.62251100  | 1.75321700  | -1.93698000 |
| C | 1.30350700  | 3.99499000  | -0.64542900 |



|    |             |             |             |
|----|-------------|-------------|-------------|
| C  | 2.52902500  | 2.51729300  | 0.80045800  |
| C  | 0.20474200  | 3.95370200  | 0.22107900  |
| H  | 1.23823500  | 4.59582600  | -1.55016000 |
| C  | 1.45448100  | 2.47097500  | 1.67297700  |
| H  | 3.41696100  | 1.93183900  | 1.01712300  |
| C  | 0.25750500  | 3.14404100  | 1.36172100  |
| H  | -0.69266100 | 4.51087400  | -0.01883300 |
| H  | 1.49080600  | 1.87314800  | 2.57696800  |
| O  | -0.78006700 | 2.90306500  | 2.19891100  |
| C  | 1.83374400  | -1.33116700 | -2.98607300 |
| H  | 0.86299300  | -0.87861600 | -3.21709500 |
| H  | 2.14781000  | -1.84562800 | -3.90341500 |
| C  | 1.66139400  | -2.45514100 | -1.93766300 |
| H  | 0.86451100  | -3.13494100 | -2.25852700 |
| H  | 2.57963000  | -3.03283100 | -1.85708200 |
| N  | 1.32465400  | -1.98701000 | -0.56870800 |
| C  | 0.60490700  | -0.86885700 | -0.38534700 |
| C  | -0.20436100 | -0.47955900 | 0.77169500  |
| H  | 0.68837800  | -0.12178900 | -1.15847700 |
| H  | -0.12297100 | 0.56111800  | 1.06958300  |
| H  | -0.20211000 | -1.16110200 | 1.61521700  |
| S  | 2.02459500  | -2.88124000 | 0.81057900  |
| O  | 2.96022300  | -3.80294200 | 0.17032200  |
| O  | 0.95164600  | -3.35749600 | 1.67666900  |
| C  | 2.92497000  | -1.60620700 | 1.67453400  |
| C  | 4.14351200  | -1.16673500 | 1.15402900  |
| C  | 2.42147500  | -1.11339500 | 2.88041100  |
| C  | 4.84968000  | -0.18747300 | 1.84707800  |
| H  | 4.53846000  | -1.58009300 | 0.23426300  |
| C  | 3.14451100  | -0.13277800 | 3.55520000  |
| H  | 1.49438900  | -1.50239400 | 3.28549000  |
| C  | 4.35733600  | 0.35468500  | 3.04461900  |
| H  | 5.79143800  | 0.16296500  | 1.43683400  |
| H  | 2.76122200  | 0.25798200  | 4.49359600  |
| C  | 5.09153300  | 1.46990500  | 3.74445600  |
| H  | 6.16516600  | 1.43582900  | 3.54045400  |
| H  | 4.71863700  | 2.44146700  | 3.39640100  |
| H  | 4.94353400  | 1.43294900  | 4.82728500  |
| C  | -2.09779800 | 3.30249700  | 1.80023800  |
| H  | -2.34543700 | 2.92352500  | 0.80325500  |
| H  | -2.77954900 | 2.84556900  | 2.51559100  |
| H  | -2.20460600 | 4.39368100  | 1.81751500  |
| In | -4.70863200 | -0.08674100 | -0.19030100 |
| Cl | -5.21323900 | 2.23617800  | -0.55102400 |

|    |             |             |             |
|----|-------------|-------------|-------------|
| Cl | -3.90805300 | 0.05292400  | 2.05908200  |
| Cl | -6.51877300 | -1.36241900 | -0.90079800 |
| C  | 2.45994200  | 3.25816000  | -0.39045700 |
| C  | 3.56526200  | 3.12560900  | -1.41569800 |
| H  | 3.41374100  | 3.82564600  | -2.24495300 |
| H  | 4.54305800  | 3.34645500  | -0.98054400 |
